# Supplementary material
Source: PubMed Central journal article supplement (PMC2948069)

## Supporting Information:

### Intramolecular Hydroamination of Unbiased and Functionalized Primary Aminoalkenes Catalyzed by a Rhodium Aminophosphine Complex

Lisa D. Julian and John F. Hartwig

#### Table of Contents:

|                                                                           |      |
|---------------------------------------------------------------------------|------|
| General Experimental Information                                          | S-2  |
| Synthesis and Characterization of Ligands and Rhodium Complexes           | S-3  |
| Procedures and Spectral Data for Determination of Catalyst Resting States | S-7  |
| Synthesis and Characterization of Aminoalkene Substrates                  | S-11 |
| Tabulated Spectral Data for Products                                      | S-22 |
| Kinetic Data                                                              | S-31 |
| References                                                                | S-34 |
| Crystallographic data for [(L1')Rh(NCMe)]BF <sub>4</sub>                  | S-36 |
| NMR Spectra of Hydroamination Products                                    | S-76 |

## General Experimental Information

**General Procedures.** All manipulations were conducted under an inert atmosphere using an argon-filled glovebox (Innovative Technologies, Newburyport, Massachusetts) equipped with an oxygen sensor (working oxygen level <20.0 ppm) and low-temperature refrigeration unit (-31 °C). All reactions were conducted in flame- or oven-dried round-bottomed flasks fitted with rubber septa under a positive pressure of argon or 1-dram vials fitted with a Teflon-lined screw cap (13-mm diameter, 425 GPI thread; supplied by Qorpak, Bridgeville, Pennsylvania) under an atmosphere of nitrogen, unless otherwise noted. Organic solutions were concentrated by rotary evaporation at 25–35 °C. Analytical thin-layer chromatography (TLC) was performed using glass plates pre-coated with silica gel (0.25 mm, 60 Å pore size) impregnated with a fluorescent indicator (254 nm). TLC plates were visualized by exposure to ultraviolet light (UV) and/or submersion in aqueous potassium permanganate solution (KMnO<sub>4</sub>), followed by brief heating.

THF and diethyl ether were obtained as HPLC grade without inhibitors; benzene, toluene, dichloromethane, and acetonitrile were obtained as ACS reagent grade. THF, diethyl ether, benzene, toluene, and dichloromethane were degassed by purging with nitrogen for 45 min and dried with a solvent purification system containing a 1 m column containing activated alumina. Anhydrous 1,4-dioxane was obtained from Aldrich and used without further purification. Anhydrous *t*BuOH was obtained from Aldrich and degassed with nitrogen prior to use. The rhodium catalyst [Rh(CH<sub>3</sub>CN)<sub>2</sub>COD]BF<sub>4</sub> and ligand **L1'** were obtained from Aldrich and used as received.

2,2-diphenylpent-4-en-1-amine (**1**),<sup>1</sup> N-benzyl-2,2-diphenylpent-4-en-1-amine,<sup>1</sup> 2-phenylpent-4-en-1-amine (**1b**),<sup>2</sup> 5-chloropenta-1,3-diene,<sup>3</sup> N-benzyl-pent-4-en-1-amine,<sup>4</sup> *t*Bu-Xantphos **L2**,<sup>5</sup> and Cy-xantphos **L3**,<sup>6</sup> were synthesized according to literature procedures.

**Instrumentation.** <sup>1</sup>H NMR spectra were obtained at 400 or 500 MHz and recorded relative to residual protio-solvent. <sup>13</sup>C NMR spectra were obtained at 100 or 125 MHz, and chemical shifts were recorded relative to the solvent resonance. <sup>31</sup>P NMR spectra were obtained 162 or 202 MHz, and chemical shifts are reported relative to external 85%

H<sub>3</sub>PO<sub>4</sub>. Analytical gas chromatography (GC) was performed using a Hewlett-Packard 6980 Gas Chromatograph fitted with a flame ionization detector.

***Synthesis and Characterization of Ligands and Rh Complexes:***

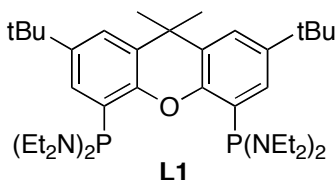

**4,5-(Bis[bis-diethylamido]phosphonito)-9,9-dimethylxanthene (L1).** To a solution of 4,5-dibromo-2,7-di-*tert*-butyl-9,9-dimethyl-9*H*-xanthene (1.11 g, 2.31 mmol) in THF (27 mL) at  $-78$  °C was added *n*-BuLi (3.80 mL of a 1.2 M solution in hexanes, 4.62 mmol) dropwise. After stirring this mixture for 1 h at  $-78$  °C, neat bis(diethylamino)-chlorophosphine (1.0 mL, 4.7 mmol) was added dropwise, and the reaction was slowly warmed to room temperature over a 1.5 h period. The reaction mixture was concentrated *in vacuo*, diluted with dry CH<sub>2</sub>Cl<sub>2</sub>, filtered through dry Celite, and concentrated again under reduced pressure. The residue was brought into the glovebox, diluted with pentane, and the resulting suspension was filtered. The filtrate was concentrated *in vacuo*. This material was diluted with a small amount of pentane and decanted ( $\times 2$ ) to afford 350 mg of pure ( $>98\%$ ) ligand **L1** as a white solid. The decanted solution was placed in a  $-30$  °C freezer and allowed to recrystallize. The crystals were collected and washed with cold pentane to give 300 mg of product. This recrystallization procedure was repeated an additional four times to give a total of 1.04 g of **L1** (67%). <sup>1</sup>H NMR (500 MHz, C<sub>6</sub>D<sub>6</sub>):  $\delta$  7.70 (t,  $J = 2.5$  Hz, 2H), 7.53 (s, 2H), 3.27 (m, 16H), 1.76 (s, 6H), 1.39 (s, 18H), 1.11 (t,  $J = 7.0$  Hz, 24H). <sup>13</sup>C NMR (125 MHz, C<sub>6</sub>D<sub>6</sub>):  $\delta$  149.2 (t,  $J = 9.3$  Hz), 144.4, 129.9 (d,  $J = 20.2$  Hz), 129.0, 128.3, 122.9, 43.6 (t,  $J = 11.0$  Hz), 34.8, 34.8, 33.7, 31.9, 14.9. <sup>31</sup>P NMR (202 MHz, C<sub>6</sub>D<sub>6</sub>):  $\delta$  93.5. Anal. Calcd for C<sub>39</sub>H<sub>68</sub>N<sub>4</sub>OP<sub>2</sub>: C, 69.82; H, 10.22; N, 8.35 Found: C, 69.54; H, 10.03; N, 8.10.

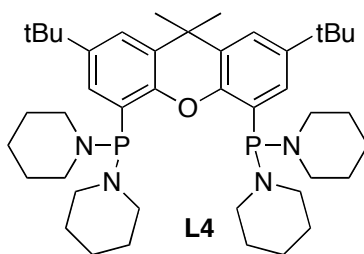

**4,5-(Bis[bis-dipiperidino]phosphonito)-9,9-dimethylxanthene (L4).** To a solution of 4,5-dibromo-2,7-di-*tert*-butyl-9,9-dimethyl-9*H*-xanthene (400 mg, 0.830 mmol) in THF (8 mL) at  $-78\text{ }^{\circ}\text{C}$  was added *n*-BuLi (0.68 mL of a 2.5 M solution in hexane, 1.71 mmol) dropwise. After this mixture was stirred for 1 h at  $-78\text{ }^{\circ}\text{C}$ , a solution of bis(dipiperidiny)chlorophosphine<sup>7</sup> (401 mg, 1.71 mmol) in 0.5 mL of THF was added dropwise and then warmed to  $-35\text{ }^{\circ}\text{C}$  over 15 min, at which point the cold bath was removed. The reaction mixture was concentrated *in vacuo*, diluted with dry  $\text{CH}_2\text{Cl}_2$ , filtered through dry Celite, and concentrated again under reduced pressure. The residue was brought into the glovebox, diluted with pentane, and filtered. The filtrate was concentrated *in vacuo*. This material was diluted with a small amount of pentane and decanted to obtain **L4** (120 mg, 20%) as a white powder.  $^1\text{H}$  NMR (500 MHz,  $\text{C}_6\text{D}_6$ ):  $\delta$  7.81 (s, 2H), 7.54 (s, 2H), 3.27 (m, 8H), 3.20 (m, 8H), 1.73 (s, 6H), 1.63 (m, 8H), 1.47 (m, 16H), 1.41 (s, 18H).  $^{13}\text{C}$  NMR (125 MHz,  $\text{C}_6\text{D}_6$ ):  $\delta$  149.8, (t,  $J = 8.3$  Hz), 144.4, 129.2, 128.3, 128.1, 122.7, 50.8 (t,  $J = 10.1$  Hz), 34.9, 34.8, 33.1, 31.9, 27.8 (t,  $J = 3.8$  Hz), 25.5.  $^{31}\text{P}$  NMR (202 MHz,  $\text{C}_6\text{D}_6$ ):  $\delta$  92.3 (s). Anal. Calcd for  $\text{C}_{43}\text{H}_{68}\text{N}_4\text{OP}_2 \cdot 0.8 \text{C}_5\text{H}_{12}$ : C, 72.68; H, 10.07; N, 7.21 Found: C, 72.26; H, 9.96; N, 6.85.

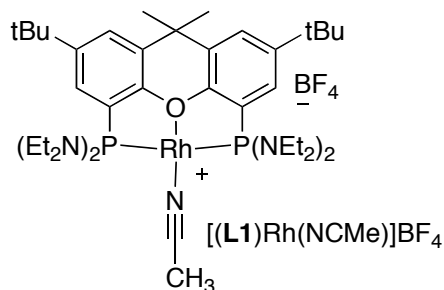

**[(L1)Rh(NCMe)]BF<sub>4</sub>.**  $[\text{Rh}(\text{CH}_3\text{CN})_2\text{COD}]\text{BF}_4$  (200 mg, 0.526 mmol) and **L1** (360 mg, 0.537 mmol) were added to a vial and dissolved in 5 mL of THF. After being stirred for 10 min, the reaction mixture was filtered through a cotton plug and concentrated *in vacuo*. The residue was diluted with pentane, mixed thoroughly, and concentrated to give

a yellow powder. The crude solid was suspended in pentane, decanted and washed with a 1:1 mixture of ether:pentane to afford 425 mg (89% yield) of the POP-pincer complex  $[(\mathbf{L1})\text{Rh}(\text{NCMe})]\text{BF}_4$  as a yellow solid. This material was ~93% pure by  $^1\text{H}$  NMR spectroscopy and was used without further purification for studies to determine the resting state of the catalyst. A small portion of this solid was recrystallized by dissolving the solid with a minimal amount of THF and diluting with pentane to afford an analytically pure sample.  $^1\text{H}$  NMR (500 MHz,  $\text{C}_6\text{D}_6$ ):  $\delta$  7.72 (s, 2H), 7.47 (s, 2H), 3.37 (m, 8H), 3.23 (m, 8H), 2.48 (s, 3H), 1.33 (s, 6H), 1.28 (s, 18H), 1.12 (t,  $J = 6.5$  Hz, 24H).  $^{13}\text{C}$  NMR (125 MHz,  $\text{C}_6\text{D}_6$ ):  $\delta$  153.3 (t,  $J = 11.1$  Hz), 148.4, 131.0, 129.1 (t,  $J = 14.8$  Hz), 128.4, 126.5, 125.8, 40.9 ( $J = 5.0$  Hz), 34.7, 34.7, 32.3, 31.4, 14.3, 4.1.  $^{31}\text{P}$  NMR (202 MHz,  $\text{C}_6\text{D}_6$ ):  $\delta$  109.0 (d,  $J = 154$  Hz). Anal. Calcd for  $\text{C}_{41}\text{H}_{71}\text{BF}_4\text{N}_5\text{OP}_2\text{Rh}$ : C, 54.61; H, 7.94; N, 7.77 Found: C, 54.93; H, 8.25; N, 7.72.

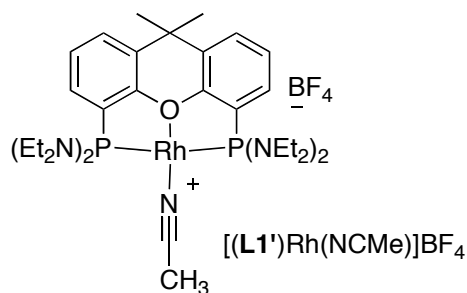

$[(\mathbf{L1}')\text{Rh}(\text{NCMe})]\text{BF}_4$ .  $[\text{Rh}(\text{CH}_3\text{CN})_2\text{COD}]\text{BF}_4$  (49 mg, 0.13 mmol) and  $\mathbf{L1}'$  (77 mg, 0.14 mmol) were added to a vial and dissolved in 1 mL of THF. After being stirred for 20 min, the reaction mixture was filtered through a cotton plug and concentrated *in vacuo*. The residue was diluted with benzene, filtered, and concentrated to give a yellow powder. The crude solid was suspended in ether, filtered, and washed repeatedly with ether to afford 68 mg (67% yield) of the POP-pincer complex  $[(\mathbf{L1}')\text{Rh}(\text{NCMe})]\text{BF}_4$  as a yellow solid in analytically pure form.  $^1\text{H}$  NMR (500 MHz,  $\text{THF-d}_8$ ):  $\delta$  7.75 (d,  $J = 8.0$  Hz, 4H), 7.05 (t,  $J = 7.5$  Hz, 2H), 3.32 (m, 16H), 2.52 (s, 3H), 1.62 (s, 6H), 1.16 (t,  $J = 7.0$  Hz, 24H).  $^{13}\text{C}$  NMR (125 MHz,  $\text{THF-d}_8$ ):  $\delta$  155.8, (t,  $J = 10.7$  Hz), 132.8, 132.7, 130.8, 130.0, 129.5, (t,  $J = 14.6$  Hz), 126.6, 41.1, 35.1, 32.4, 14.2, 3.7.  $^{31}\text{P}$  NMR (202 MHz,  $\text{THF-d}_8$ ):  $\delta$  109.4 (d,  $J = 153$  Hz). Anal. Calcd for  $\text{C}_{33}\text{H}_{55}\text{BF}_4\text{N}_5\text{OP}_2\text{Rh}$ : C, 50.20; H, 7.02; N, 8.87 Found: C, 50.22; H, 7.46; N, 8.46.

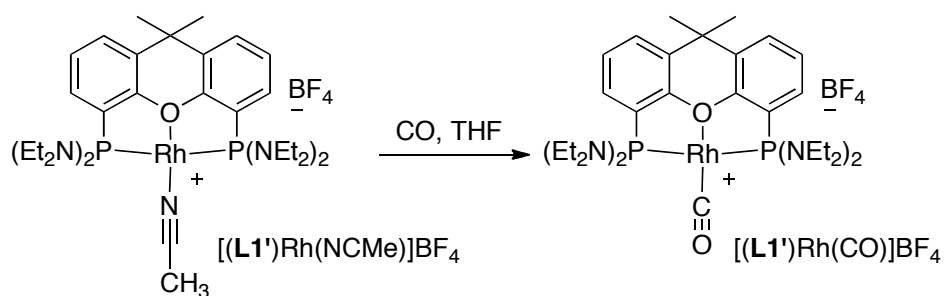

**[(L1')Rh(CO)]BF<sub>4</sub>**. To a solution of [(L1')Rh(NCMe)]BF<sub>4</sub> (40 mg, 0.05 mmol) in THF (1.5 mL) in a J. Young NMR tube was added CO (200 Torr) and mixed thoroughly. After 1 h, the solution was concentrated *in vacuo* to afford a light yellow solid (38 mg, 97%) in analytically pure form: <sup>1</sup>H NMR (500 MHz, THF-d<sub>8</sub>): δ 7.99 (d, *J* = 8.0 Hz), 7.89 (m, 1H), 7.6 (t, *J* = 7.5 Hz), 3.29 (m, 16H), 1.72 (s, 6H), 1.14 (t, *J* = 7.0 Hz). <sup>31</sup>P NMR (202 MHz, THF-d<sub>8</sub>): δ 114.3 (d, *J* = 138 Hz). Anal. Calcd for C<sub>32</sub>H<sub>52</sub>BF<sub>4</sub>N<sub>4</sub>O<sub>2</sub>P<sub>2</sub>Rh: C, 49.50; H, 6.75; N, 7.22. Found: C, 49.78; H, 6.80; N, 7.13. FT-IR (thin-film): ν(CO) = 1993.3 cm<sup>-1</sup>.

**[(L1')Rh(<sup>13</sup>CO)]BF<sub>4</sub>**. The <sup>13</sup>C-labeled complex was synthesized according to the procedure described above, except 99% atom <sup>13</sup>CO was used to generate the <sup>13</sup>CO-enriched complex. <sup>31</sup>P NMR (162 MHz, THF-d<sub>8</sub>): δ 114.2 (dd, *J*<sub>(P-Rh)</sub> = 138.0 Hz; *J*<sub>(P-C)</sub> = 14.7 Hz). <sup>13</sup>C NMR (125 MHz, THF-d<sub>8</sub>): δ 191.3 (dt, *J*<sub>(C-Rh)</sub> = 91.8 Hz; *J*<sub>(C-P)</sub> = 14.7 Hz; <sup>13</sup>CO), 153.8 (t, *J* = 10.7 Hz), 133.3, 132.9, 131.2, 128.3, 126.8 (t, *J* = 19.5 Hz), 41.6 (t, *J* = 4.9 Hz), 35.3, 32.7, 14.0.

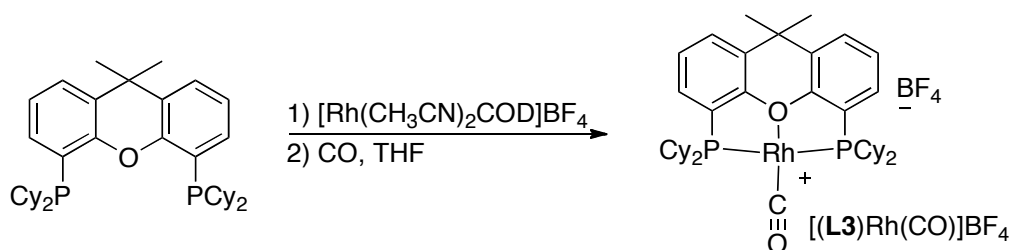

**[(L3)Rh(CO)]BF<sub>4</sub>**. [Rh(CH<sub>3</sub>CN)<sub>2</sub>COD]BF<sub>4</sub> (30 mg, 0.079 mmol) and Cy-xantphos **L3** (50 mg, 0.083 mmol) were added to a vial and dissolved in 1 mL of THF. After 15 min, the reaction mixture was filtered through a cotton plug and concentrated *in vacuo*. The residue was first triturated from pentane and then triturated from benzene. The residual solid was washed again with pentane to give 40 mg (61%) a yellow powder: <sup>1</sup>H NMR (500 MHz, THF-d<sub>8</sub>): δ 7.74 (m, 4H), 7.36 (t, *J* = 7.5 Hz, 2H), 2.54 (s, 3H), 2.51 (m, 4H),

1.87 (app br d,  $J = 13.0$  Hz, 4H), 1.68 (m, 20H), 1.63 (s, 6H), 1.34 (m, 16H).  $^{31}\text{P}$  NMR (202 MHz, THF- $d_8$ ):  $\delta$  39.6 (d,  $J = 131$  Hz).

To a solution of the acetonitrile complex (22 mg, 0.026 mmol) in THF (0.6 mL) in a J. Young NMR tube was added CO (200 Torr) and mixed thoroughly. After 1 h, the solution was concentrated *in vacuo* to afford a light yellow powder (21 mg, 100%). The residue was first triturated from pentane and then triturated from benzene. The residual solid was washed again with pentane to give the CO complex  $[(\mathbf{L3})\text{Rh}(\text{CO})]\text{BF}_4$  in analytically pure form:  $^1\text{H}$  NMR (500 MHz, THF- $d_8$ ):  $\delta$  7.99 (m, 2H), 7.95 (d,  $J = 8.0$  Hz, 2H), 7.57 (t,  $J = 7.5$  Hz, 2H), 2.79 (m, 4H), 2.34 (app br d,  $J = 12.5$  Hz, 4H), 1.84 (app br d,  $J = 13.0$  Hz, 4H), 1.71 (m, 18H), 1.54 (qt,  $J = 13.0, 1.0$  Hz, 4H), 1.32 (m, 16H).  $^{31}\text{P}$  NMR (202 MHz, THF- $d_8$ ):  $\delta$  53.1 (d,  $J = 113.9$  Hz). Anal. Calcd for  $\text{C}_{40}\text{H}_{56}\text{BF}_4\text{N}_4\text{O}_2\text{P}_2\text{Rh}\cdot 0.22\text{C}_6\text{H}_6$ : C, 59.23; H, 6.90; N, 0.0. Found: C, 59.12; H, 6.85; N, 0.35. FT-IR (thin-film):  $\nu(\text{CO}) = 1992.7$   $\text{cm}^{-1}$ .

$[(\mathbf{L3})\text{Rh}(^{13}\text{CO})]\text{BF}_4$ . The  $^{13}\text{C}$ -labeled complex was synthesized according to the procedure described above, except 99% atom  $^{13}\text{CO}$  was used to generate the  $^{13}\text{CO}$ -enriched complex.  $^{31}\text{P}$  NMR (202 MHz, THF- $d_8$ ):  $\delta$  56.5 (dd,  $J_{(\text{P-Rh})} = 113.5$  Hz;  $J_{(\text{P-C})} = 14.8$  Hz).  $^{13}\text{C}$  NMR (125 MHz, THF- $d_8$ ):  $\delta$  191.3 (dt,  $J_{(\text{C-Rh})} = 86.5$  Hz;  $J_{(\text{C-P})} = 13.8$  Hz;  $^{13}\text{CO}$ ), 156.6 (t,  $J = 8.4$  Hz), 134.4, 133.1, 132.4, 128.6, 118.4 (t,  $J = 14.6$  Hz), 36.9 (t,  $J = 13.7$  Hz), 34.9, 33.5, 31.5, 30.2, 27.2, 27.2, 26.9, 26.4, 25.8.

### ***Procedures and Spectral Data for Determination of Catalyst Resting States:***

**Representative Procedure for Identification of the Catalyst Resting State in the Hydroamination of Aminoalkene **1b**.** A mixture of complex  $[(\mathbf{L1})\text{Rh}(\text{NCMe})]\text{BF}_4$  (13.2 mg, 0.0146 mmol), aminoalkene **1b** (40 mg, 0.25 mmol), and trimethoxybenzene (5.0 mg, 0.03 mmol) was dissolved in solvent (0.5 mL), transferred to an NMR tube, and monitored by  $^{31}\text{P}\{^1\text{H}\}$  NMR spectroscopy. The initial spectrum was acquired at room temperature. The reaction was heated to 62 °C, and  $^{31}\text{P}\{^1\text{H}\}$  and  $^1\text{H}$  NMR spectra were recorded during the course of the reaction until full conversion of the starting material was observed.

**Independent Synthesis of Model Rh-intermediates:**

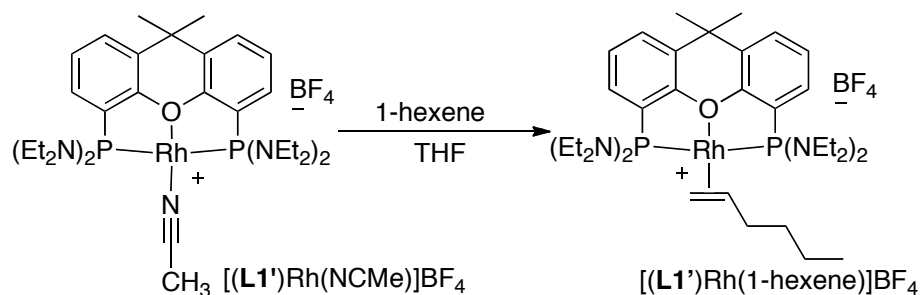

**Synthesis of Model Olefin Complex: [(L1')Rh(1-hexene)]BF<sub>4</sub>.** The acetonitrile complex [(L1')Rh(NCMe)]BF<sub>4</sub> (81.0 mg, 0.103 mmol) was dissolved in THF (0.14 mL) and 1-hexene (0.70 mL, 5.5 mmol). After being stirred for 21 h, the reaction mixture was concentrated and left under vacuum for 1 h. The residue was re-dissolved in THF (0.7 mL) and 1-hexene (0.70 mL, 5.5 mmol), stirred an additional 23 h, and concentrated *in vacuo*. The crude residue was washed with ether and pentane to afford [(L1')Rh(1-hexene)]BF<sub>4</sub> (65 mg, 76%) as a yellow solid in analytically pure form. <sup>1</sup>H NMR (500 MHz, THF-d<sub>8</sub>): δ 7.90 (d, *J* = 7.5 Hz, 2H), 7.73 (m, 2H), 7.49 (t, *J* = 7.5 Hz, 2H), 4.17 (br s, 1H), 3.53 (m, 4H), 3.41 (m, 1H), 3.32 (m, 4H), 3.23 (m, 4H), 3.06 (m, 4H), 2.47 (br, 1H), 2.37 (m, 1H), 1.66 (s, 6H), 1.43 (m, 5H), 1.13 (t, *J* = 7.0 Hz, 12H), 1.01 (t, *J* = 7.0 Hz, 12H), 0.95 (t, *J* = 7.0 Hz, 3H). <sup>13</sup>C NMR (125 MHz, THF-d<sub>8</sub>): δ 155.0 (t, *J* = 12.8 Hz), 133.4, 131.3, 130.3, 128.1 (t, *J* = 14.7 Hz), 127.4, 68.0 (d, *J* = 14.6 Hz), 50.4 (d, *J* = 15.6 Hz), 41.7, 41.1, 40.3, 35.5, 35.3, 31.1, 23.3, 14.3, 14.3, 14.0. <sup>31</sup>P NMR (202 MHz, THF-d<sub>8</sub>): δ 115.3 (d, *J* = 146 Hz); <sup>31</sup>P NMR (162 MHz, *t*BuOH, 60 °C): δ 112.0 (d, *J* = 147 Hz). Anal. Calcd for C<sub>37</sub>H<sub>64</sub>BF<sub>4</sub>N<sub>4</sub>OP<sub>2</sub>Rh: C, 53.38; H, 7.75; N, 6.73 Found: C, 53.09; H, 7.80; N, 6.84.

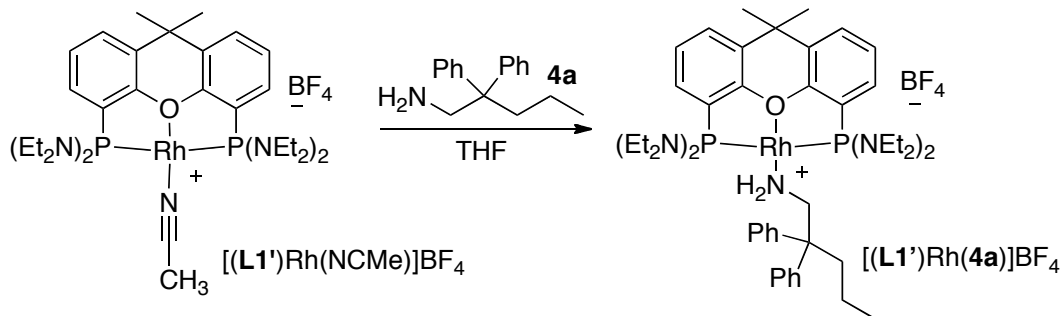

**Synthesis of Model Amine Complex: [(L1')Rh(4a)]BF<sub>4</sub>.** A solution of **4a** (37 mg, 0.16 mmol) in 0.8 mL of THF was added to complex [(L1')Rh(NCMe)]BF<sub>4</sub> (53 mg, 0.067



mmol). After being stirred for 14 h at 50 °C, the reaction mixture was concentrated *in vacuo*. The crude residue was washed with a 3:1 mixture of pentane:ether (×3) to afford  $[(\mathbf{L1}')\text{Rh}(\mathbf{4a})]\text{BF}_4$  (58 mg, 89%) as a yellow solid. A portion of this material (40 mg) was dissolved in a mixture of ether:THF and layered with pentane. The solvent was decanted, and the resulting solid was washed with pentane (×2) to afford 23 mg of  $[(\mathbf{L1}')\text{Rh}(\mathbf{4a})]\text{BF}_4$  in analytically pure form.  $^1\text{H}$  NMR (500 MHz, THF- $d_8$ ):  $\delta$  7.68 (m, 2H), 7.64 (dd,  $J = 7.5, 1.0$  Hz, 2H), 7.31 (t,  $J = 7.5$  Hz, 4H), 7.26 (t,  $J = 8.0$  Hz, 2H), 7.22 (d,  $J = 7.5$  Hz, 4H), 7.21 (overlapping m, 2H), 3.53 (m, 8H), 3.39 (m, 2H), 2.99 (m, 8H), 2.48 (br s, 1H), 2.44 (br s, 1H), 2.29 (br t,  $J = 6.9$  Hz, 2H), 1.54 (s, 6H), 1.08 (t,  $J = 7.0$  Hz, 24H), 1.00 (overlapping m, 2H), (0.91 (br s, 3H).  $^{13}\text{C}$  NMR (125 MHz, THF- $d_8$ ):  $\delta$  156.2 (t,  $J = 9.8$  Hz), 146.6, 132.9, 130.5 (t,  $J = 10.8$  Hz), 129.8, 129.8, 129.4, 129.3, 129.2, 129.1, 127.2, 127.2, 125.9, 125.9, 53.8, 41.1, 41.1, 37.9, 35.1, 31.4, 31.4, 19.0, 14.4, 14.3, 14.3.  $^{31}\text{P}$  NMR (202 MHz, THF- $d_8$ ):  $\delta$  108.9 (d,  $J = 168$  Hz);  $^{31}\text{P}$  NMR (162 MHz, *t*BuOH, 60 °C):  $\delta$  105.9 (d,  $J = 166$  Hz). Anal. Calcd for  $\text{C}_{48}\text{H}_{73}\text{BF}_4\text{N}_5\text{OP}_2\text{Rh}$ : C, 58.36; H, 7.45; N, 7.09 Found: C, 58.16; H, 7.80; N, 6.91.

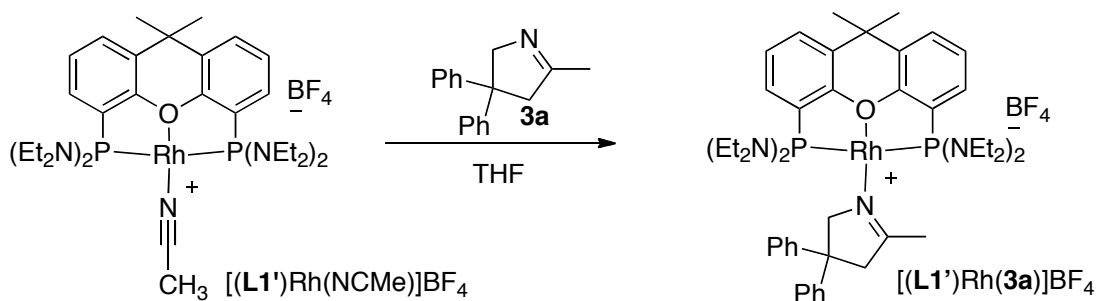

**Independent Synthesis of Imine Complex:  $[(\mathbf{L1}')\text{Rh}(\mathbf{3a})]\text{BF}_4$ .** To a mixture of complex  $[(\mathbf{L1}')\text{Rh}(\text{NCMe})]\text{BF}_4$  (53.0 mg, 0.013 mmol) and imine **3a** (10 mg, 0.043 mmol) was added THF (0.5 mL). After being stirred for 1 h, the reaction mixture was diluted with  $\text{Et}_2\text{O}$ . The mixture was filtered through a glass frit and the yellow solid was washed repeatedly with  $\text{Et}_2\text{O}$  to afford the imine complex  $[(\mathbf{L1}')\text{Rh}(\mathbf{3a})]\text{BF}_4$  (49 mg, 75% yield) in analytically pure form:  $^1\text{H}$  NMR (500 MHz, THF- $d_8$ ):  $\delta$  7.72 (d,  $J = 7.5$  Hz, 2H), 7.30 (m, 10H), 7.15 (t,  $J = 7.0$  Hz, 4H), 4.65 (s, 2H), 3.59 (br, 4H), 3.59 (s, 2H), 3.05 (br, 12H), 2.85 (s, 3H), 1.41 (br, 6H), 0.99 (br, 24H).  $^{31}\text{P}$  NMR (202 MHz, THF- $d_8$ ):  $\delta$  109.6 (d,  $J = 168$  Hz).  $^{31}\text{P}$  NMR (162 MHz, *t*BuOH, 60 °C):  $\delta$  105.5 (d,  $J = 168$  Hz).  $^{13}\text{C}$  NMR (125 MHz, THF- $d_8$ ):  $\delta$  184.9, 155.7 (t,  $J = 10.0$  Hz), 147.4, 132.8 (br t,  $J = 2.9$  Hz),

130.3, 130.0, 129.6 (t,  $J = 11.9$  Hz), 129.4, 127.7, 127.2, 126.0, 78.7, 67.9, 56.3, 50.3, 43.8 (br), 40.6 (br), 35.0, 25.8, 16.4 (br), 13.1 (br) . Anal. Calcd for  $C_{48}H_{69}BF_4N_5OP_2Rh$ : C, 58.60; H, 7.07; N, 7.12 Found: C, 58.24; H, 7.20; N, 7.06.

**Procedure for determination of relative binding affinities of amines and olefins for**

**rhodium:** A solution of  $[(L1')Rh(1\text{-hexene})]BF_4$  (15.0 mg, 0.018 mmol) in THF (0.5 mL) was transferred to an NMR tube, and benzylamine (3.0  $\mu$ L, 0.027 mmol) was added. After 13 min, the ratio of primary amine complex to olefin complex was measured to be 15:1, based on relative integrations of the two peaks in the  $^{31}P$  NMR spectrum ( $\delta$  112.0, d,  $J = 147$  Hz and  $\delta$  106.1, d,  $J = 168$  Hz). The peaks were assigned by chemical shift and magnitude of the Rh-P coupling constant. These values were similar to those of the isolated primary amine complex  $[(L1')Rh(4a)]BF_4$ . After 16 h, the reaction had reached equilibrium and the ratio of primary amine complex to olefin complex was measured to be 26:1.

A solution of  $[(L1')Rh(1\text{-hexene})]BF_4$  (15.0 mg, 0.018 mmol) in THF (0.5 mL) was transferred to an NMR tube, and *N*-methylbenzylamine (3.5  $\mu$ L, 0.027 mmol) was added. After 13 min, the ratio of secondary amine complex to olefin complex was measured to be 1:6.6 based on relative integrations of these two peaks in the  $^{31}P$  NMR spectrum ( $\delta$  112.0, d,  $J = 147$  Hz and  $\delta$  105.8, d,  $J = 175$  Hz). The peaks were assigned by chemical shift and magnitude of the Rh-P coupling constant. We have not been able to isolate a stable complex of a secondary amine, but we assumed that the chemical shift and coupling constant would be similar to those of the primary amine complex  $[(L1')Rh(4a)]BF_4$ . After 16 h, the reaction had reached equilibrium and the ratio of secondary amine complex to olefin complex was measured to be 1:2.5.

### Synthesis and Characterization of Aminoalkene Substrates:

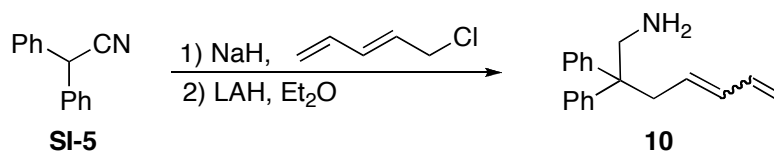

**2,2-Diphenylhepta-4,6-dienyl-1-amine (10).** To a suspension of NaH (60% dispersion in mineral oil, 1.25 g, 31.2 mmol) in DMF (30 mL) at room temperature was added a solution of diphenylacetonitrile **SI-5** (5.50 g, 28.4 mmol) in 6 mL of DMF. After being stirred for 20 min, the reaction mixture was cooled to 0 °C and 5-chloropenta-1,3-diene (3.06 g, 29.8 mmol) was added dropwise. The ice bath was removed and after being stirred for 12 h, the reaction mixture was poured into ice cold saturated aqueous NH<sub>4</sub>Cl and diluted with EtOAc. The aqueous layer was extracted with EtOAc (×3) and the combined organic layers were washed with water (×2) and brine (×1), dried with MgSO<sub>4</sub>, filtered, and concentrated *in vacuo*. The crude material was purified by flash chromatography on silica gel (5%→10% EtOAc/hexanes) to afford known 2,2-diphenylhepta-4,6-dienenitrile (4.49 g, 61%) as a 10:1 mixture of olefin isomers.<sup>8</sup>

To a suspension of LiAlH<sub>4</sub> (1.31 g, 34.6 mmol) in Et<sub>2</sub>O (25 mL) at 0 °C was slowly added a solution of diphenylhepta-4,6-dienenitrile (4.49 g, 17.3 mmol) in 5 mL of Et<sub>2</sub>O. After addition of the substrate, the ice bath was removed. After being stirred for 18 h, the reaction mixture was cooled to 0 °C and quenched by slow, sequential addition of water (1.3 mL), 15% NaOH (1.3 mL) and water (3.9 mL). The mixture was warmed to room temperature, stirred for an additional 30 min, filtered, and concentrated *in vacuo*. The crude material was purified by flash chromatography on silica gel (40%→100% EtOAc/hexanes) to afford 2,2-diphenylhepta-4,6-dienyl-1-amine **10** (4.4 g, 96%, 10:1 mixture of *E*:*Z* olefin isomers) as a colorless oil. Data reported for the major *E*-isomer: <sup>1</sup>H NMR (500 MHz, CDCl<sub>3</sub>): δ 7.30 (t, *J* = 7.5 Hz, 4H), 7.20 (m, 6H), 6.67 (dt, *J* = 17.0, 10.0 Hz, 1H), 6.07 (dd, *J* = 15.0, 10.5 Hz, 1H), 5.23 (dt, *J* = 15.0, 7.5 Hz, 1H), 5.06 (d, *J* = 17.0 Hz, 1H), 4.94 (d, *J* = 10.0 Hz, 1H), 3.32 (s, 2H), 2.97 (d, *J* = 7.5 Hz, 2H), 0.90 (br s, 2H). <sup>13</sup>C NMR (125 MHz, CDCl<sub>3</sub>): δ 146.2, 137.0, 134.0, 130.7, 128.3, 128.2, 126.2, 115.6, 51.8, 48.7, 40.0. Anal. Calcd for C<sub>19</sub>H<sub>21</sub>N: C, 86.65; H, 8.04; N, 5.32. Found: C, 86.38; H, 8.18; N, 5.57.

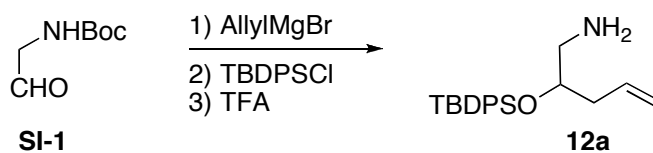

**2-(*tert*-Butyldiphenylsilyloxy)pent-4-en-1-amine (12a).** To a solution of *tert*-butyl 2-oxoethylcarbamate **SI-1** (1.06 g, 6.67 mmol) in THF (60 mL) at 0 °C was added allylmagnesium bromide (13.7 mL of a 1 M solution in ether, 13.7 mmol) dropwise. After being stirred for 1 h at 0 °C, the reaction mixture was quenched with saturated  $\text{NH}_4\text{Cl}$ , extracted with EtOAc, washed with brine ( $\times 1$ ), dried with  $\text{MgSO}_4$  and concentrated *in vacuo*. The crude material was purified by flash column chromatography on silica gel (10%  $\rightarrow$  50% EtOAc/hexanes) to afford *tert*-Butyl-2-hydroxypent-4-enylcarbamate (480 mg, 36% yield) as a colorless oil:  $^1\text{H}$  NMR (500 MHz,  $\text{CDCl}_3$ ):  $\delta$  5.81 (m, 1H), 5.14 (d, overlapping,  $J = 17.5$  Hz, 1H), 5.13 (d, overlapping,  $J = 10.5$  Hz, 1H), 4.98 (br s, 1H), 3.75 (br s, 1H), 3.33 (m, 1H), 3.03 (m, 1H), 2.60 (br s, 1H), 2.23 (m, 2H), 1.44 (s, 9H).  $^{13}\text{C}$  NMR (125 MHz,  $\text{CDCl}_3$ ):  $\delta$  156.9, 134.1, 118.5, 79.8, 70.6, 46.1, 39.5, 28.5. Anal. Calcd for  $\text{C}_{10}\text{H}_{19}\text{NO}_3$ : C, 59.68; H, 9.52; N, 6.96 Found: C, 59.41; H, 9.70; N, 6.93.

TBDPSCl (0.64 mL, 2.4 mmol) was added to a solution of *tert*-Butyl 2-hydroxypent-4-enylcarbamate (450 mg, 2.23 mmol) and imidazole (167 mg, 2.45 mmol) and stirred at room temperature for 48 h. The reaction was quenched with water, extracted with EtOAc, washed with brine ( $\times 1$ ), dried with  $\text{MgSO}_4$  and concentrated *in vacuo*. The crude material was purified by flash column chromatography on silica gel (3%  $\rightarrow$  6% EtOAc/hexanes) to afford *tert*-Butyl 2-(*tert*-butyldiphenylsilyloxy)pent-4-enylcarbamate (734 mg, 75%) as a colorless oil:  $^1\text{H}$  NMR (500 MHz,  $\text{CDCl}_3$ ):  $\delta$  7.67 (m, 4H), 7.44 (m, 2H), 7.38 (t,  $J = 7.5$  Hz, 4H), 5.67 (m, 1H), 4.97 (d,  $J = 10.0$  Hz, 1H), 4.93 (d,  $J = 17.0$  Hz, 1H), 4.66 (br s, 1H), 3.83 (br s, 1H), 3.16 (m, 2H), 2.19 (m, 2H), 1.41 (s, 9H), 1.08 (s, 9H).  $^{13}\text{C}$  NMR (125 MHz,  $\text{CDCl}_3$ ):  $\delta$  156.0, 136.0, 135.9, 134.0, 133.9, 129.9, 129.9, 127.9, 127.8, 117.8, 79.1, 72.4, 45.4, 39.6, 28.5, 27.2, 19.5. Anal. Calcd for  $\text{C}_{26}\text{H}_{37}\text{NO}_3\text{Si}$ : C, 71.03; H, 8.48; N, 3.19. Found: C, 70.87; H, 8.33; N, 3.25.

The product carbamate (630 mg, 1.43 mmol) was dissolved in a 1:1 mixture (7 mL) of TFA: $\text{CH}_2\text{Cl}_2$ . After being stirred for 50 min, the reaction mixture was quenched with 1

M NaOH and extracted with CH<sub>2</sub>Cl<sub>2</sub>. The organic layer was washed with brine (×1), dried with MgSO<sub>4</sub> and concentrated *in vacuo*. The crude material was purified by flash column chromatography on silica gel (50%→100% EtOAc/hexanes) to afford 2-(*tert*-butyldiphenylsilyloxy)pent-4-en-1-amine **12a** (374 mg, 77%) as a colorless oil: <sup>1</sup>H NMR (500 MHz, CDCl<sub>3</sub>): δ 7.69 (m, 4H), 7.41 (m, 6H), 5.67 (dddd, *J* = 17.0, 10.0, 7.0, 7.0 Hz, 1H), 4.95 (m, 2H), 3.72 (m, 1H), 2.70 (dd, *J* = 13.5, 4.5 Hz, 1H), 2.63 (dd, *J* = 13.5, 5.0 Hz, 1H), 2.24 (m, 2H), 1.14 (br s, 2H), 1.08 (s, 9H). <sup>13</sup>C NMR (125 MHz, CDCl<sub>3</sub>): δ 136.0, 135.9, 134.6, 134.3, 129.8, 127.8, 127.7, 117.2, 74.6, 46.9, 39.2, 27.2, 19.5. Anal. Calcd for C<sub>21</sub>H<sub>29</sub>NOSi: C, 74.28; H, 8.61; N, 4.13 Found: C, 74.21; H, 8.65; N, 4.15.

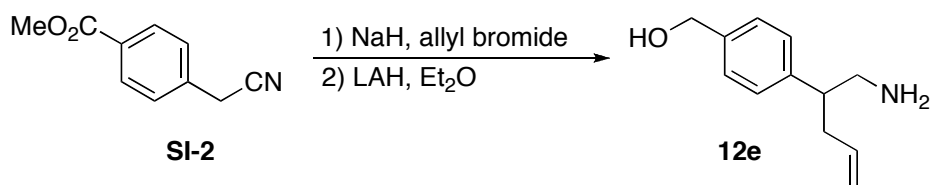

**2-(4-Hydroxymethyl)phenylpent-4-en-1-amine (12e)**. To a suspension of NaH (60% dispersion in mineral oil, 503 mg, 12.6 mmol) in DMF (20 mL) at room temperature was added a solution of methyl 4-(cyanomethyl)benzoate **SI-2** (2.0 g, 11.4 mmol) in 5 mL of DMF. After being stirred for 15 min, the dark red mixture was cannulated into a separate flask containing a solution of allyl bromide (4.8 mL, 57.0 mmol) in DMF (20 mL) at 0 °C. After being stirred for 1 h, the reaction mixture was quenched with saturated aqueous NH<sub>4</sub>Cl and diluted with EtOAc. The aqueous layer was extracted with EtOAc (×3) and the combined organic layers were washed with water (×2) and brine (×1), dried with MgSO<sub>4</sub>, filtered, and concentrated *in vacuo*. The crude material was purified by flash chromatography on silica gel (5% →10% →20% EtOAc/hexanes) to afford methyl 4-(1-cyanobut-3-enyl)benzoate (1.15 g, 47%) as a colorless oil. <sup>1</sup>H NMR (500 MHz, CDCl<sub>3</sub>): δ 8.06 (d, *J* = 8.5 Hz, 2H), 7.42 (d, *J* = 8.5 Hz, 2H), 5.78 (dddd, *J* = 17.0, 10.0, 6.5, 6.5 Hz, 1H), 5.19 (d, *J* = 9.5 Hz, 1H), 5.18 (dd, *J* = 17.0, 1.5 Hz, 1H), 3.94 (overlapping, 1H), 3.93 (s, 3H), 2.65 (m, 2H).

To a suspension of LiAlH<sub>4</sub> (790 mg, 20.8 mmol) in Et<sub>2</sub>O (15 mL) at 0 °C was slowly added a solution of the nitrile (1.12 g, 5.2 mmol) in 5 mL of Et<sub>2</sub>O. After addition of the substrate, the ice bath was removed. After being stirred for 1.5 h, the reaction mixture was cooled to 0 °C and quenched by slow, sequential addition of water (0.79

mL), 15% NaOH (0.79 mL) and water (1.6 mL). The mixture was warmed to room temperature, stirred for an additional 30 min, filtered, and concentrated *in vacuo*. The crude material was purified by flash chromatography on silica gel (100:0→100:2 EtOAc/Et<sub>3</sub>N→100:5:2 CH<sub>2</sub>Cl<sub>2</sub>:MeOH:Et<sub>3</sub>N) to afford the 2-(4-hydroxymethyl)phenylpent-4-en-1-amine (**12e**) (562 mg, 57%) as a colorless oil. <sup>1</sup>H NMR (500 MHz, CDCl<sub>3</sub>): δ 7.26 (t, *J* = 8.0 Hz, 2H), 7.10 (d, *J* = 8.0 Hz, 2H), 5.63 (dddd, *J* = 17.0, 10.0, 6.5, 6.5 Hz, 1H), 4.98 (dd, *J* = 17.0, 1.5 Hz, 1H), 4.91 (dd, *J* = 10.0, 1.5 Hz, 1H), 4.56 (s, 2H), 2.88 (dd, *J* = 12.5, 5.0 Hz, 1H), 2.74 (dd, *J* = 12.5, 9.0 Hz, 1H), 2.64 (m, 1H), 2.33 (m, 5H). <sup>13</sup>C NMR (125 MHz, CDCl<sub>3</sub>): δ 141.6, 140.0, 136.3, 127.9, 127.2, 116.3, 64.2, 48.7, 47.0, 38.4. Anal. Calcd for C<sub>12</sub>H<sub>17</sub>NO: C, 75.35; H, 8.96; N, 7.32. Found: C, 75.13; H, 9.09; N, 7.11. HRMS (ES<sup>+</sup>) *m/z* Calcd for C<sub>12</sub>H<sub>18</sub>NO [M+H]<sup>+</sup> 192.1388, found 192.1380.

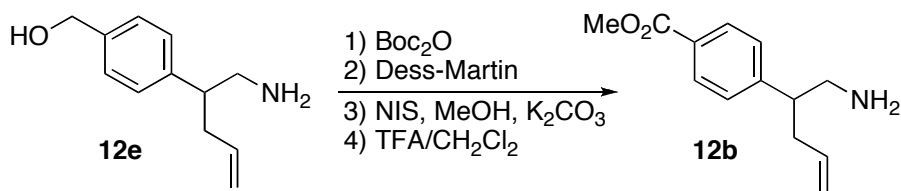

**2-(4-Methylcarboxy)phenylpent-4-en-1-amine (12b).** To a solution of 2-(4-hydroxymethyl)phenylpent-4-en-1-amine **12e** (crude material from the previous step) (1.02 g, 5.35 mmol) in EtOH (20 mL) was added NaHCO<sub>3</sub> (909 mg, 10.7 mmol) and Boc<sub>2</sub>O (1.28 mg, 5.87 mmol). After being stirred for 19 h, the reaction mixture was concentrated to approximately half the volume and diluted with water and EtOAc. The aqueous layer was extracted with EtOAc (×3) and the combined organic layers were washed with water (×2) and brine (×1), dried with MgSO<sub>4</sub>, filtered, and concentrated *in vacuo*. The crude material was purified by flash chromatography on silica gel (20%→35% EtOAc/hexanes) to afford the product (802 mg, 52% over 2 steps) as a colorless oil. <sup>1</sup>H NMR (500 MHz, CDCl<sub>3</sub>): δ 7.33 (d, *J* = 8.0 Hz, 2H), 7.17 (d, *J* = 8.0 Hz, 2H), 5.67 (dddd, *J* = 17.0, 10.0, 6.5, 6.5 Hz, 1H), 5.00 (d, *J* = 16.5 Hz, 1H), 4.95 (d, *J* = 10.5 Hz, 1H), 4.68 (s, 2H), 4.37 (br s, 1H), 3.55 (ddd, *J* = 13.5, 6.5, 6.5 Hz, 1H), 3.14 (ddd, *J* = 14.0, 9.0, 4.5 Hz, 1H), 2.86 (m, 1H), 2.38 (m, 2H), 1.70 (br s, 1H), 1.40 (s, 9H).

To a mixture of the primary alcohol (1.65 g, 5.67 mmol) and NaHCO<sub>3</sub> (964 mg,

11.3 mmol) in  $\text{CH}_2\text{Cl}_2$  (50 mL) at 0 °C was added Dess-Martin periodinane (2.58 g, 6.08 mmol). After being stirred for 2 h at 0 °C, the reaction mixture was quenched with saturated aqueous  $\text{NaHCO}_3$  and excess solid  $\text{Na}_2\text{S}_2\text{O}_3 \cdot 5\text{H}_2\text{O}$ . After stirring vigorously for 30 min, the mixture was extracted with  $\text{CH}_2\text{Cl}_2$  ( $\times 2$ ), washed with brine ( $\times 1$ ), dried with  $\text{MgSO}_4$ , filtered, and concentrated *in vacuo*. The crude material was purified by flash chromatography on silica gel (10%  $\rightarrow$  30% EtOAc/hexanes) to afford the aldehyde (1.38 g, 84%) as a white waxy solid.  $^1\text{H}$  NMR (500 MHz,  $\text{CDCl}_3$ ):  $\delta$  9.99 (s, 1H), 7.84 (d,  $J = 8.5$  Hz, 2H), 7.35 (d,  $J = 8.0$  Hz, 2H), 5.65 (dddd,  $J = 17.5, 10.5, 7.0, 7.0$  Hz, 1H), 5.00 (d,  $J = 17.5$  Hz, 1H), 4.97 (d,  $J = 10.5$  Hz, 1H), 4.40 (br s, 1H), 3.55 (m, 1H), 3.22 (ddd,  $J = 14.0, 9.0, 5.5$  Hz, 1H), 2.99 (m, 1H), 2.42 (m, 2H), 1.39 (s, 9H).

To a mixture of the aldehyde (1.35 g, 4.67 mmol), and  $\text{K}_2\text{CO}_3$  (1.61 g, 11.7 mmol) in MeOH (46 mL) was added *N*-iodosuccinimide (2.63 g 11.7 mmol). The flask was wrapped in foil and allowed to stir for 19 h at room temperature. The reaction mixture was quenched by addition of water and  $\text{Na}_2\text{S}_2\text{O}_3 \cdot 5\text{H}_2\text{O}$  (4.5 g, 18.1 mmol). After being stirred for 5 min, the mixture was extracted with EtOAc ( $\times 2$ ) and the combined organic layers were washed with brine ( $\times 1$ ), dried with  $\text{MgSO}_4$ , filtered, and concentrated *in vacuo*. The crude material was purified by flash chromatography on silica gel (12%  $\rightarrow$  16% EtOAc/hexanes) to afford the methyl ester (1.39 g, 93%) as a colorless oil.  $^1\text{H}$  NMR (500 MHz,  $\text{CDCl}_3$ ):  $\delta$  7.99 (d,  $J = 8.0$  Hz, 2H), 7.25 (d,  $J = 8.5$  Hz, 2H), 5.64 (dddd,  $J = 17.0, 10.0, 6.5, 6.5$  Hz, 1H), 4.99 (d,  $J = 17.0$  Hz, 1H), 4.96 (d,  $J = 11.0$  Hz, 1H), 4.37 (br s, 1H), 3.91 (s, 3H), 3.56 (ddd,  $J = 13.0, 6.5, 6.5$  Hz, 1H), 3.19 (ddd,  $J = 13.5, 9.0, 5.0$  Hz, 1H), 2.95 (m, 1H), 2.40 (m, 2H), 1.39 (s, 9H).

The methyl ester (1.33 g, 4.17 mmol) was dissolved in  $\text{CH}_2\text{Cl}_2$  (12 mL) and TFA (6 mL). After being stirred at room temperature for 2.5 h, the reaction mixture was cooled to 0 °C and quenched by addition of saturated aqueous  $\text{NaHCO}_3$ . The aqueous layer was extracted with  $\text{CH}_2\text{Cl}_2$  ( $\times 2$ ), washed with brine ( $\times 1$ ), dried with  $\text{MgSO}_4$ , filtered, and concentrated *in vacuo*. The crude material was purified by flash chromatography on silica gel (50%  $\rightarrow$  100% EtOAc/hexanes  $\rightarrow$  100:2 EtOAc:Et<sub>3</sub>N) to afford 2-(4-methylcarboxy)phenylpent-4-en-1-amine (**12b**) (717 mg, 79%) as a light yellow oil.  $^1\text{H}$  NMR (500 MHz,  $\text{CDCl}_3$ ):  $\delta$  8.00 (d,  $J = 8.5$  Hz, 2H), 7.27 (d,  $J = 8.0$  Hz, 2H), 5.66 (dddd,  $J = 17.0, 10.0, 7.0, 7.0$  Hz, 1H), 4.98 (dd,  $J = 17.0, 1.5$  Hz, 1H), 4.94 (dd,  $J = 10.0,$

1.0 Hz, 1H), 3.91 (s, 3H), 3.00 (dd,  $J = 13.0, 5.5$  Hz, 1H), 2.89 (dd,  $J = 13.0, 8.5$  Hz, 1H), 2.77 (ddd,  $J = 14.5, 8.5, 6.0$  Hz, 2.45 (m, 1H), 2.36 (m, 1H), 1.04 (br s, 2H).  $^{13}\text{C}$  NMR (125 MHz,  $\text{CDCl}_3$ ):  $\delta$  167.1, 148.8, 136.1, 130.0, 128.6, 128.1, 116.7, 52.1, 49.6, 47.4, 38.2. Anal. Calcd for  $\text{C}_{13}\text{H}_{17}\text{NO}_2$ : C, 71.21; H, 7.81; N, 6.39. Found: C, 70.99; H, 7.59; N, 6.69.

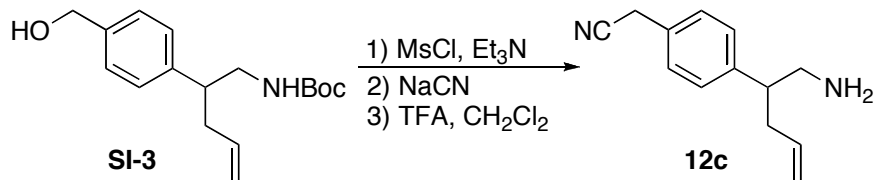

**2-(4-Cyano)phenylpent-4-en-1-amine (12c).** To a solution of **SI-3** (see above, 380 mg, 1.31 mmol) in THF (13 mL) was added  $\text{Et}_3\text{N}$  (0.274 mL, 1.96 mmol), followed by MsCl (0.112 mL, 1.44 mmol). After being stirred for 20 min at room temperature, the reaction mixture was quenched with saturated aqueous  $\text{NaHCO}_3$ . The aqueous layer was extracted with EtOAc ( $\times 1$ ) and the combined organic layers were washed with brine ( $\times 1$ ), dried with  $\text{MgSO}_4$ , filtered, and concentrated *in vacuo*. The crude material (477 mg) was used without further purification in the following reaction.  $^1\text{H}$  NMR (500 MHz,  $\text{CDCl}_3$ ):  $\delta$  7.38 (d,  $J = 8.0$  Hz, 2H), 7.22 (d,  $J = 8.0$  Hz, 2H), 5.65 (dddd,  $J = 17.5, 10.0, 6.5, 6.5$  Hz, 1H), 5.22 (s, 2H), 4.98 (d,  $J = 18.0$  Hz, 1H), 1.95 (d,  $J = 10.5$  Hz, 1H), 4.38 (br s, 1H), 3.54 (m, 1H), 3.17 (ddd,  $J = 14.0, 9.0, 4.5$  Hz, 1H), 2.92 (s, 3H), 2.90 (m, 1H), 2.38 (m, 2H), 1.39 (s, 9H).

A mixture of the mesylate (1.31 mmol), NaCN (128 mg, 2.62 mmol) and DMF (7.0 mL) was heated to 50  $^\circ\text{C}$ . After being stirred for 40 min, the reaction mixture was cooled to room temperature, quenched with saturated aqueous  $\text{NaHCO}_3$ , and diluted with EtOAc. The mixture was extracted with EtOAc ( $\times 1$ ), washed with brine ( $\times 2$ ), dried with  $\text{MgSO}_4$  and concentrated *in vacuo*. The crude material was purified by flash column chromatography on silica gel (20%  $\rightarrow$  30% EtOAc/hexanes) to afford the Boc-protected nitrile (311 mg, 79% over two steps) as a white waxy solid:  $^1\text{H}$  NMR (500 MHz,  $\text{CDCl}_3$ ):  $\delta$  7.28 (d,  $J = 8.0$  Hz, 2H), 7.19 (d,  $J = 8.0$  Hz, 2H), 5.65 (dddd,  $J = 17.0, 10.0, 7.0, 7.0$  Hz, 1H), 4.99 (d,  $J = 17.0$  Hz, 1H), 4.96 (d,  $J = 10.5$  Hz, 1H), 4.37 (br s, 1H), 3.73 (s, 2H), 3.53 (m, 1H), 3.16 (ddd,  $J = 14.0, 9.0, 5.5$  Hz, 1H), 2.88 (m, 1H), 2.38 (m, 2H), 1.40 (s, 9H).



To a solution of the Boc-protected nitrile (414 mg, 1.38 mmol) in dry CH<sub>2</sub>Cl<sub>2</sub> (5 mL) was added TFA (2.5 mL). After being stirred for 2.5 h, the reaction was poured into saturated aqueous NaHCO<sub>3</sub>. The aqueous layer was extracted with 10% MeOH/CH<sub>2</sub>Cl<sub>2</sub> (×3), dried with MgSO<sub>4</sub> and concentrated *in vacuo*. The crude material was purified by flash column chromatography on silica gel (100:0→100:2 EtOAc/Et<sub>3</sub>N) to afford 2-(4-cyano)phenylpent-4-en-1-amine **12c** (214 mg, 78%) as a colorless oil: <sup>1</sup>H NMR (500 MHz, CDCl<sub>3</sub>): δ 7.28 (d, *J* = 8.0 Hz, 2H), 7.20 (d, *J* = 8.0 Hz, 2H), 5.66 (dddd, *J* = 17.0, 10.0, 6.5, 6.5 Hz, 1H), 4.98 (d, *J* = 17.5 Hz, 1H), 4.94 (dd, *J* = 10.0, 1.0 Hz, 1H), 3.72 (s, 2H), 2.97 (dd, *J* = 13.5, 5.5 Hz, 1H), 2.85 (dd, *J* = 13.0, 9.0 Hz, 1H), 2.70 (ddd, *J* = 14.0, 9.0, 6.0 Hz, 1H), 2.42 (ddd, *J* = 14.0, 7.0, 7.0 Hz, 1H), 2.34 (ddd, *J* = 14.0, 7.0, 7.0 Hz, 1H), 0.98 (br s, 2H). <sup>13</sup>C NMR (125 MHz, CDCl<sub>3</sub>): δ 143.3, 136.4, 128.8, 128.2, 128.1, 118.1, 116.5, 49.1, 47.5, 38.3, 23.4. HRMS (ES<sup>+</sup>) *m/z* Calcd for C<sub>13</sub>H<sub>16</sub>N<sub>2</sub> [M+H]<sup>+</sup> 200.1392, found 200.1390.

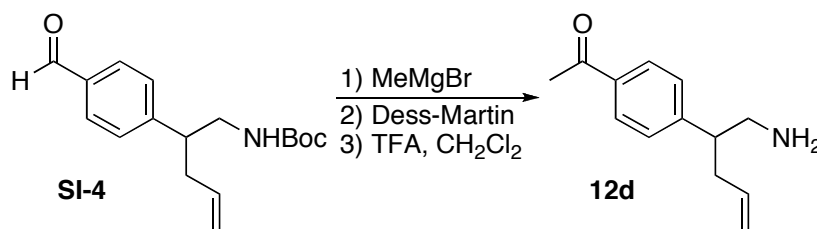

**2-(4-Acetyl)phenylpent-4-en-1-amine (12d)**. To a solution of **SI-4** (see above, 599 mg, 2.07 mmol) in THF (40 mL) at 0 °C was added MeMgBr (1.7 mL of a 3M solution in Et<sub>2</sub>O, 5.1 mmol). After being stirred for 1.5 h at 0 °C, the reaction mixture was quenched with saturated NH<sub>4</sub>Cl, extracted with EtOAc (×3), washed with brine (×1), dried with MgSO<sub>4</sub> and concentrated *in vacuo*. The crude material was purified by flash column chromatography on silica gel (10%→30% EtOAc/hexanes) to afford the secondary alcohol (435 mg, 69% yield) as a colorless oil: <sup>1</sup>H NMR (400 MHz, CDCl<sub>3</sub>): δ 7.31 (d, *J* = 8.0 Hz, 2H), 7.13 (d, *J* = 8.0 Hz, 2H), 5.66 (dddd, *J* = 17.2, 10.4, 7.2 Hz, 1H), 4.99 (d, *J* = 17.2 Hz, 1H), 4.94 (d, *J* = 10.0 Hz, 1H), 4.85 (q, *J* = 6.4 Hz, 1H), 4.44 (br s, 1H), 3.53 (m, 1H), 3.12 (ddd, *J* = 13.6, 8.8, 4.8 Hz, 1H), 2.83 (m, 1H), 2.37 (m, 2H), 2.16 (br s, 1H), 1.47 (d, *J* = 6.4 Hz, 3H), 1.38 (s, 9H).

To a mixture of the secondary alcohol (408 mg, 1.34 mmol) and NaHCO<sub>3</sub> (228 mg, 2.68 mmol) in CH<sub>2</sub>Cl<sub>2</sub> (13 mL) at 0 °C was added Dess-Martin periodinane (681 mg, 1.61

mmol). After being stirred for 1.25 h at 0 °C, the reaction mixture was warmed to room temperature, stirred an additional 30 min, then quenched with saturated aqueous NaHCO<sub>3</sub> and excess solid Na<sub>2</sub>S<sub>2</sub>O<sub>3</sub>·5H<sub>2</sub>O. After stirring vigorously for 15 min, the mixture was extracted with CH<sub>2</sub>Cl<sub>2</sub> (×2), washed with brine (×1), dried with MgSO<sub>4</sub>, filtered, and concentrated *in vacuo*. The crude material was purified by flash chromatography on silica gel (8%→15% EtOAc/hexanes) to afford the ketone (344 mg, 85%) as a white solid. <sup>1</sup>H NMR (500 MHz, CDCl<sub>3</sub>): δ 7.92 (d, *J* = 8.0 Hz, 2H), 7.27 (d, *J* = 8.0 Hz, 2H), 5.64 (dddd, *J* = 17.0, 10.0, 7.0, 7.0 Hz, 1H), 4.99 (d, *J* = 17.0 Hz, 1H), 4.96 (d, *J* = 10.0 Hz, 1H), 4.39 (br s, 1H), 3.55 (m, 1H), 3.19 (ddd, *J* = 14.0, 9.0, 5.5 Hz, 1H), 2.96 (m, 1H), 2.59 (s, 3H), 2.40 (m, 2H), 1.39 (s, 9H).

To a solution of the Boc-protected ketone (344 mg, 1.14 mmol) in dry CH<sub>2</sub>Cl<sub>2</sub> (8 mL) at 0 °C was added TFA (4 mL). After being stirred for 1.75 h, the reaction was warmed to room temperature, stirred an additional 15 min, then poured into saturated aqueous NaHCO<sub>3</sub>. The aqueous layer was further basified with 1 M NaOH, extracted with 10% MeOH/CH<sub>2</sub>Cl<sub>2</sub> (×3), dried with MgSO<sub>4</sub> and concentrated *in vacuo*. The crude material was purified by flash column chromatography on silica gel (100:0→100:2 EtOAc:Et<sub>3</sub>N→100:3:2 CH<sub>2</sub>Cl<sub>2</sub>:MeOH:Et<sub>3</sub>N) to afford 2-(4-acetyl)phenylpent-4-en-1-amine **12d** (187 mg, 81%) as a waxy solid: <sup>1</sup>H NMR (500 MHz, CDCl<sub>3</sub>): δ 7.90 (d, *J* = 8.0 Hz, 2H), 7.27 (d, *J* = 8.5 Hz, 2H), 5.64 (dddd, *J* = 17.0, 10.0, 7.0, 7.0 Hz, 1H), 4.97 (d, *J* = 17.0 Hz, 1H), 4.93 (d, *J* = 10.5 Hz, 1H), 2.98 (dd, *J* = 13.0, 5.0 Hz, 1H), 2.88 (dd, *J* = 13.0, 9.0 Hz, 1H), 2.76 (m, 1H), 2.27 (m, 2H), 1.00 (br s, 2H). <sup>13</sup>C NMR (125 MHz, CDCl<sub>3</sub>): δ 197.9, 149.3, 136.1, 128.8, 128.5, 128.3, 116.7, 49.6, 47.4, 38.1, 26.6. HRMS (ES+) *m/z* Calcd for C<sub>13</sub>H<sub>17</sub>NO [M+H]<sup>+</sup> 204.1388, found 204.1383.

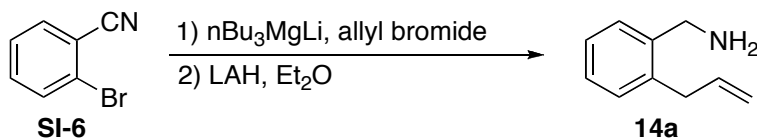

**2-Allylbenzylamine (14a).** 2-allylbenzylamine was prepared according to literature procedure.<sup>9</sup> Briefly, to a solution of *n*butylmagnesium bromide in THF (2.8 mL of a 1 M solution in THF, 2.8 mmol) at 0 °C was added *n*BuLi (4.60 mL of a 1.2 M solution in hexanes, 5.52 mmol). After being stirred for 10 min at 0 °C, the reaction mixture was cooled to -40 °C and 2-bromobenzonitrile (**SI-6**) (1.0 g, 5.52 mmol) was added slowly as

a solution in 10 mL of THF. After being stirred an additional 30 min, a solution of CuCN·2LiCl (288 mg, 1.65 mmol) in 1.65 mL of THF was added, followed by allyl bromide (1.87 mL, 22.1 mmol). After 20 min, the reaction mixture was quenched with aqueous NH<sub>4</sub>Cl and EtOAc, warmed to room temperature, and stirred vigorously for 30 min. The aqueous layer was extracted with EtOAc, washed with brine, dried with MgSO<sub>4</sub>, filtered, and concentrated *in vacuo*. The crude material was purified by flash column chromatography (10% EtOAc/hexanes) to afford 2-allylbenzonitrile<sup>9</sup> (655 mg, 83%) as a colorless oil.

To a suspension of LiAlH<sub>4</sub> (556 mg, 14.7 mmol) in Et<sub>2</sub>O (20 mL) at 0 °C was slowly added a solution of 2-bromobenzonitrile (655 mg, 4.58 mmol) in 2.5 mL of Et<sub>2</sub>O. After being stirred for 1.25 h at 0 °C, the reaction mixture was quenched by slow, sequential addition of water (0.5 mL), 15% NaOH (0.5 mL) and water (1 mL). The mixture was warmed to room temperature, stirred for an additional 30 min, filtered, and concentrated *in vacuo*. The crude material was purified by flash chromatography on silica gel (100% EtOAc→100:2 EtOAc:Et<sub>3</sub>N) to afford 2-allylbenzylamine<sup>10</sup> **14a** (534 mg, 79%) as a colorless oil. <sup>1</sup>H NMR (400 MHz, CDCl<sub>3</sub>): δ 7.35 (m, 1H), 7.21 (m, 3H), 5.99 (dddd, *J* = 17.2, 10.4, 6.4, 6.4 Hz, 1H), 5.03 (m, 2H), 3.90 (s, 2H), 3.45 (d, *J* = 6.4 Hz, 2H), 2.12 (br s, 2H).

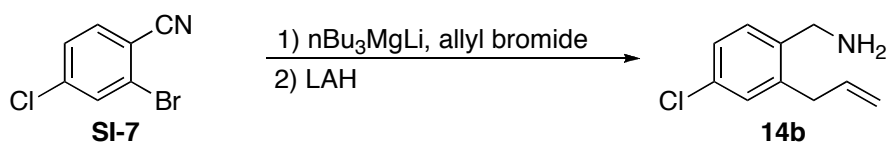

**4-Chloro-2-allylbenzylamine (14b).** 4-chloro-2-allylbenzonitrile was prepared using the procedure described above with the following modifications: After addition of 4-chloro-2-bromobenzonitrile **SI-7** (3.07 g, 14.2 mmol) to the reaction flask containing *n*Bu<sub>3</sub>MgLi at -50 °C, the mixture was stirred only 5 min prior to adding CuCN·2LiCl and allyl bromide. After being stirred 10 min, the reaction mixture was quenched with aqueous NH<sub>4</sub>Cl and worked up as above. The crude product was purified by flash column chromatography (5%→10% EtOAc/hexanes) to afford 4-chloro-2-allylbenzonitrile (1.63 g, 65%) as a colorless oil: <sup>1</sup>H NMR (500 MHz, CDCl<sub>3</sub>): δ 7.56 (d, *J* = 8.0 Hz, 1H), 7.34 (d, *J* = 1.5 Hz, 1H), 7.31 (dd, *J* = 8.5, 1.5 Hz, 1H), 5.92 (dddd, *J* = 17.0, 10.0, 6.5, 6.5 Hz, 1H), 5.21 (d, *J* = 10.0 Hz, 1H), 5.16 (d, *J* = 17.0 Hz, 1H), 3.59 (d, *J* = 6.5 Hz, 2H).

4-chloro-2-allylbenzotrile (554 mg, 3.10 mmol) was reduced using LiAlH<sub>4</sub> (354 mg, 9.30 mmol) following the exact procedure described above for the des-chloro compound. The crude material was purified by flash column chromatography (10% EtOAc/hexanes→100% EtOAc→100:2 EtOAc:Et<sub>3</sub>N→100:7:2 CH<sub>2</sub>Cl<sub>2</sub>:MeOH:Et<sub>3</sub>N) to afford 4-chloro-2-allylbzylamine **14b** (421 mg, 75%) as a yellow oil: <sup>1</sup>H NMR (500 MHz, CDCl<sub>3</sub>): δ 7.28 (d, *J* = 8.5 Hz, 1H), 7.19 (dd, *J* = 8.0, 2.0 Hz, 1H), 7.16 (d, *J* = 2.0 Hz, 1H), 5.95 (dddd, *J* = 17.0, 10.5, 6.5, 6.5 Hz, 1H), 5.10 (dd, *J* = 10.5, 1.5 Hz, 1H), 5.01 (dd, *J* = 17.0, 1.5 Hz, 1H), 3.83 (s, 2H), 3.40 (d, *J* = 6.0 Hz, 2H), 1.35 (br s, 2H). <sup>13</sup>C NMR (125 MHz, CDCl<sub>3</sub>): δ 139.7, 139.3, 136.4, 132.6, 129.7, 129.2, 126.8, 116.6, 43.2, 36.6. Anal. Calcd for C<sub>10</sub>H<sub>12</sub>ClN: C, 66.12; H, 6.66 N, 7.71 Found: C, 66.37; H, 6.94; N, 7.72

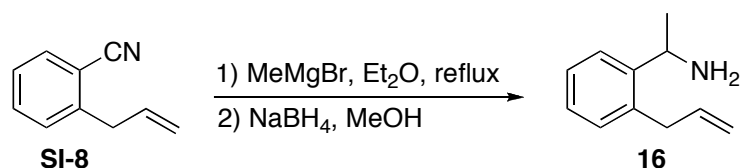

**2-Allyl-(methylbenzyl)-amine (16).** To a solution of 2-allylbenzotrile **SI-8** (439 mg, 3.07 mmol) in Et<sub>2</sub>O (3 mL) was added MeMgBr (5.11 mL of a 3 M solution in Et<sub>2</sub>O, 15.3 mmol) and heated to reflux. After being stirred for 21 h, the reaction mixture was cooled to 0 °C, quenched with anhydrous MeOH (2 mL), diluted with Et<sub>2</sub>O, filtered through a plug of celite and concentrated *in vacuo*. The crude imine was dissolved in anhydrous MeOH (8 mL) and NaBH<sub>4</sub> (190 mg, 5.07 mmol) was added in two portions. After being stirred for 1 h, the reaction mixture was quenched with saturated aqueous NaHCO<sub>3</sub>, extracted with EtOAc (×2), washed with brine (×1), dried with MgSO<sub>4</sub> and concentrated *in vacuo*. The crude material was purified by flash column chromatography on silica gel (50% EtOAc/hexanes→100% EtOAc→100:2 EtOAc:Et<sub>3</sub>N) to afford the product **16** (224 mg, 45%) as a light yellow oil: <sup>1</sup>H NMR (500 MHz, CDCl<sub>3</sub>): δ 7.50 (d, *J* = 7.5 Hz, 1H), 7.25 (dt, *J* = 8.0, 1.0 Hz, 1H), 7.18 (t, *J* = 7.5 Hz, 1H), 7.14 (d, *J* = 7.5 Hz, 1H), 6.00 (dddd, *J* = 16.5, 10.0, 6.5, 6.5 Hz, 1H), 5.07 (dd, *J* = 10.0, 1.5 Hz, 1H), 4.98 (dd, *J* = 16.0, 1.5 Hz, 1H), 4.39 (q, *J* = 7.0 Hz, 1H), 3.49 (dd, *J* = 16.0, 6.5 Hz, 1H), 3.44 (dd, *J* = 16.5, 6.0 Hz, 1H), 1.43 (br s, 2H), 1.36 (d, *J* = 6.5 Hz, 3H). <sup>13</sup>C NMR (125 MHz, CDCl<sub>3</sub>): δ 146.0, 137.8, 136.3, 130.0, 127.1, 126.8, 125.0, 115.8, 46.4, 37.0, 25.2. Anal. Calcd for

C<sub>11</sub>H<sub>15</sub>N: C, 81.94; H, 9.38; N, 8.69. Found: C, 80.85; H, 9.25; N, 8.61. HRMS (ES+) *m/z*. Calcd for C<sub>11</sub>H<sub>15</sub>N [M+H]<sup>+</sup> 162.1283, found 162.1280.

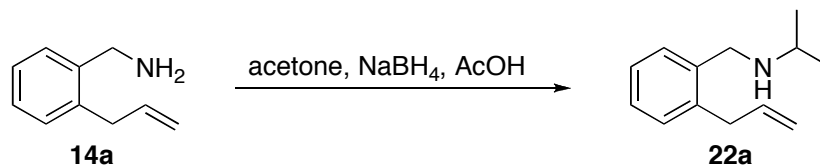

***N*-Isopropyl-2-allylbenzylamine (22a).** To a solution of 2-allylbenzylamine **14a** (298 mg, 2.03 mmol) in AcOH (4 mL) was added acetone (0.47 mL, 8.11 mmol). After being stirred at room temperature for 1 h, NaBH<sub>4</sub> (131 mg, 3.45 mmol) was added in two portions. After being stirred for 45 min, an additional 0.23 mL of acetone was added followed by 38 mg of NaBH<sub>4</sub>. After being stirred 30 min, the reaction mixture was cooled to 0 °C and quenched with 15% aqueous NaOH. Solid NaOH pellets were added until the mixture was strongly basic. The mixture was extracted with CH<sub>2</sub>Cl<sub>2</sub> (×2), washed with brine (×1), dried with MgSO<sub>4</sub> and concentrated *in vacuo*. The crude material was purified by flash column chromatography on silica gel (0%→10% MeOH/CH<sub>2</sub>Cl<sub>2</sub>) to afford the product **22a** (326 mg, 85%) as a colorless oil: <sup>1</sup>H NMR (500 MHz, CDCl<sub>3</sub>): δ 7.31 (m, 1H), 7.19 (m, 3H), 6.00 (dddd, *J* = 16.5, 10.5, 6.5, 6.0 Hz, 1H), 5.06 (dd, *J* = 10.0, 1.5 Hz, 1H), 5.00 (dd, *J* = 17.0, 2.0 Hz, 1H), 3.75 (s, 2H), 3.47 (d, *J* = 6.0 Hz, 2 H), 2.86 (septet, *J* = 6.0 Hz, 1H), 1.11 (br s, overlapping, 1H), 1.10 (d, *J* = 6.0 Hz, 6H). <sup>13</sup>C NMR (125 MHz, CDCl<sub>3</sub>): δ 138.8, 138.1, 137.8, 130.0, 129.3, 127.3, 126.6, 115.7, 49.2, 48.8, 37.0, 23.1. Anal. Calcd for C<sub>13</sub>H<sub>19</sub>N: C, 82.48; H, 10.12; N, 7.40. Found: C, 82.51; H, 9.98; N, 7.52.

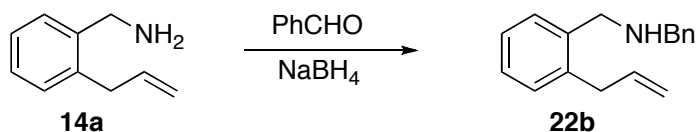

***N*-Benzyl-2-allylbenzylamine (22b).** To a solution of 2-allylbenzylamine **14a** (150 mg, 1.02 mmol) in MeOH (2 mL) was added benzaldehyde (0.11 mL, 1.12 mmol). After being stirred for 1.5 h at room temperature, NaBH<sub>4</sub> (58.0 mg, 1.53 mmol) was added in two portions. After being stirred for an additional 20 min, the reaction mixture was quenched with 1 M NaOH. The aqueous layer was extracted with EtOAc (×2), washed with brine (×1), dried with MgSO<sub>4</sub> and concentrated *in vacuo*. The crude material was purified by flash column chromatography on silica gel (20%→50% EtOAc/hexanes) to

afford the product **22b** (230 mg, 94%) as a colorless oil:  $^1\text{H}$  NMR (500 MHz,  $\text{CDCl}_3$ ):  $\delta$  7.37 (m, 5H), 7.24 (m, 4H), 6.0 (m, 1H), 5.06 (dd,  $J = 10.0, 1.5$  Hz, 1H), 4.97 (dd,  $J = 17.5, 1.5$  Hz, 1H), 3.87 (s, 2H), 3.82 (s, 2H), 3.48 (d,  $J = 5.5$  Hz, 2H), 1.54 (br s, 1H).  $^{13}\text{C}$  NMR (125 MHz,  $\text{CDCl}_3$ ):  $\delta$  140.6, 138.4, 138.3, 137.6, 126.5, 129.9, 128.5, 127.4, 127.0, 126.5, 115.7, 53.8, 50.8, 36.9. Anal. Calcd for  $\text{C}_{17}\text{H}_{19}\text{N}$ : C, 86.03; H, 8.07; N, 5.90. Found: C, 86.23; H, 8.33; N, 6.07.

**General Hydroamination Procedure (0.5 mmol scale):** To a vial containing  $[\text{Rh}(\text{CH}_3\text{CN})_2\text{COD}]\text{BF}_4$  (1.9 mg, 0.0050 mmol, 1 mol%) and ligand (4.0 mg, 0.0060 mmol, 1.2 mol%) was added the aminoalkene (0.5 mmol). Solvent (1 mL) was added to this mixture, and the vial was capped with a Teflon-lined screw cap. The vial was removed from the glovebox and was placed in a preheated oil bath at either 70 °C or 100 °C (or stirred at room temperature). After the time indicated, the reaction was removed from the oil bath and quenched with 1 M NaOH. The mixture was extracted with  $\text{CH}_2\text{Cl}_2$  ( $\times 2$ ) and the combined organic layers were dried with  $\text{MgSO}_4$ , filtered, and concentrated *in vacuo*. The crude material was purified by flash column chromatography to afford the cyclized hydroamination product.

***Tabulated Spectral Data for Products:***

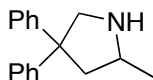

**2-Methyl-4,4-diphenylpyrrolidine (2a).** Reaction conducted on 0.5 mmol scale with 1 mol% [Rh] for 3 h at 70 °C according to the general procedure. The indicated compound was purified by flash chromatography on silica gel (50% EtOAc/hexanes  $\rightarrow$  100% EtOAc  $\rightarrow$  100:2 EtOAc:Et<sub>3</sub>N) and obtained in an 80% yield in *t*BuOH (94 mg) or 71% yield in THF (84 mg) as a colorless oil. Spectral data for this compound match literature values.<sup>11</sup>  $^1\text{H}$  NMR (500 MHz,  $\text{CDCl}_3$ ):  $\delta$  7.29 (m, 8H), 7.19 (m, 2 H), 3.70 (dd,  $J = 11.0, 1.0$  Hz, 1H), 3.49 (d,  $J = 11.0$  Hz, 1H), 3.39 (ddq,  $J = 9.0, 6.5, 6.5$  Hz, 1H), 2.76 (ddd,  $J = 13.0, 6.5, 1.0$  Hz, 1H), 2.21 (br s, 1H), 2.06 (dd,  $J = 13.0, 9.0$  Hz, 1H), 1.23 (d,  $J = 6.5$  Hz, 3H).  $^{13}\text{C}$  NMR (125 MHz,  $\text{CDCl}_3$ ):  $\delta$  147.7, 147.0, 128.2, 128.2, 126.9, 126.9, 125.9, 125.8, 57.8, 57.2, 53.0, 47.0.

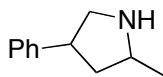

**2-Methyl-4-phenylpyrrolidine (2b).** Reaction conducted on 0.5 mmol scale in *t*BuOH with 3 mol% [Rh] for 15 h at 70 °C according to the general procedure. The indicated compound was purified by flash chromatography on silica gel (66% EtOAc/hexanes→100% EtOAc→100:2 EtOAc:Et<sub>3</sub>N→100:5:2 CH<sub>2</sub>Cl<sub>2</sub>:MeOH:Et<sub>3</sub>N) and obtained in a 62% yield (50 mg, run 1) and 70% yield (run 2) as a light yellow oil. Spectral data match literature values.<sup>12</sup> <sup>1</sup>H NMR (500 MHz, CDCl<sub>3</sub>, reported as a 2:1 mixture of diastereomers): δ <sup>13</sup>C NMR (125 MHz, CDCl<sub>3</sub>): δ 7.26 (m, 7.5 H), 3.46 (m, 1H), 3.34 (m, 3H), 3.02 (m, 1H), 2.87 (dd, *J* = 11.0, 9.0 Hz, 0.5 H), 2.37 (m, 1H), 2.03 (m, 2H), 1.82 (dddd, *J* = 13.0, 9.5, 6.5, 6.5 Hz, 0.5H), 1.45 (m, 1H), 1.27 (d, *J* = 6 Hz, 3H), 1.25 (d, *J* = 6.5 Hz, 1.5 H). <sup>13</sup>C NMR (125 MHz, CDCl<sub>3</sub>): δ 144.7, 144.6, 128.5, 127.4, 127.2, 126.2, 126.2, 56.0, 55.4, 54.9, 54.6, 46.6, 45.5, 43.6, 42.1, 22.1, 21.6.

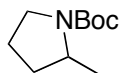

***N*-Boc-2-Methylpyrrolidine (7a-Boc).** Reaction conducted on 0.5 mmol scale in *t*BuOH with 4 mol% [Rh] for 7 h at 70 °C according to the general procedure with the following modifications: After cooling to room temperature, the reaction mixture was quenched directly with NaHCO<sub>3</sub> (84 mg, 0.99 mmol) and Boc<sub>2</sub>O (131 mg, 0.60 mmol). After being stirred for 20 min, the mixture was quenched with brine and diluted with CH<sub>2</sub>Cl<sub>2</sub>. Trimethoxybenzene (9.7 mg, 0.058 mmol) was then added to this mixture. The aqueous layer was extracted with CH<sub>2</sub>Cl<sub>2</sub> (×2) and the combined organic layers were dried with MgSO<sub>4</sub>, filtered, and concentrated *in vacuo*. The indicated compound was obtained in a 76% NMR yield based on relative integrations to trimethoxybenzene as the internal standard. The crude material was purified by flash chromatography on silica gel (5%→10% EtOAc/hexanes) and obtained in a 67% yield as a 10:1:1 mixture of **7a-Boc**:*N*-Boc-3-amino-1-pentene:BocNEt<sub>2</sub> (62 mg) as a colorless oil. Spectral data for this compound match literature values.<sup>13</sup> <sup>1</sup>H NMR (500 MHz, CDCl<sub>3</sub>, 50 °C): δ 3.80 (br s, 1H), 3.27 (t, *J* = 8.5 Hz, 2H), 1.82 (m, 3H), 1.56 (m, 1H), 1.39 (s, 9H), 1.09 (d, *J* = 6.4 Hz, 3H).

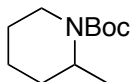

**N-Boc-2-Methylpiperidine (7b-Boc).** Reaction conducted on 0.5 mmol scale in *t*BuOH with 4 mol% [Rh] for 8 h at 70 °C according to the general procedure with the following modification: After cooling to room-temperature, the reaction mixture was quenched directly with NaHCO<sub>3</sub> (86 mg, 1.01 mmol) and Boc<sub>2</sub>O (133 mg, 0.61 mmol). After being stirred for 20 min, the mixture was quenched with brine, extracted with CH<sub>2</sub>Cl<sub>2</sub> (×2) and the combined organic layers were dried with MgSO<sub>4</sub>, filtered, and concentrated *in vacuo*. The crude material was purified by flash chromatography on silica gel (5%→10% EtOAc/hexanes) and obtained in a 77% yield (75 mg) as a colorless oil. Spectral data for this compound match literature values.<sup>13</sup> <sup>1</sup>H NMR (500 MHz, C<sub>6</sub>D<sub>6</sub>): δ 4.32 (br t, *J* = 5.5 Hz, 1H), 3.87 (dd, *J* = 13.5, 2.5 Hz, 1H), 2.76 (dt, *J* = 13.5, 3.0 Hz, 1H), 1.55 (m, 4H), 1.44 (m, 1H), 1.41 (s, 9H), 1.32 (m, 1H), 1.07 (d, *J* = 7.0 Hz, 3H). <sup>13</sup>C NMR (125 MHz, CDCl<sub>3</sub>): δ 155.2, 79.1, 46.2, 38.8, 30.2, 28.6, 25.8, 18.8, 15.8.

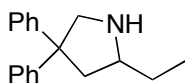

**2-Ethyl-4,4-diphenylpyrrolidine (9).** Reaction conducted on 0.5 mmol scale in dioxane with 18 mol% [Rh] for 15 h at 100 °C according to the general procedure. The indicated compound was purified by flash chromatography on silica gel (20%→66% EtOAc/hexanes→66% EtOAc/hexanes (with 2% Et<sub>3</sub>N)→100:2 EtOAc:Et<sub>3</sub>N) and obtained in a 48% yield (61 mg, run 1), 35% yield (44 mg, run 2), and 39% yield (49 mg, run 3) as a light yellow oil. Spectral data for this compound match literature values.<sup>14</sup> <sup>1</sup>H NMR (500 MHz, CDCl<sub>3</sub>): δ 7.28 (m, 8H), 7.17 (dt, *J* = 7.0, 1.5 Hz, 2H), 3.70 (dd, *J* = 11.5, 1.5 Hz, 1H), 3.41, (d, *J* = 11.5 Hz, 1H), 3.14 (dddd, *J* = 13.5, 7.0, 6.5, 6.5 Hz, 1H), 2.77 (dd, 13.0, 6.5 Hz, 1H), 2.03 (dd, *J* = 13.0, 9.5 Hz, 1H), 1.87 (br s, 1H), 1.51 (m, 2H), 0.94, (t, *J* = 7.5 Hz, 3H). <sup>13</sup>C NMR (125 MHz, CDCl<sub>3</sub>): δ 147.9, 147.1, 128.5, 128.4, 127.2, 126.1, 59.5, 57.8, 56.9, 45.1, 30.1, 11.8.

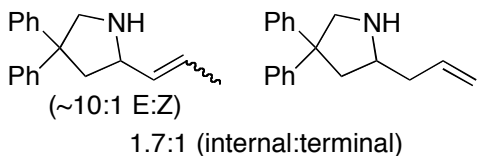

**4,4-Diphenyl-2-(prop-1-enyl)pyrrolidine and 2-allyl-4,4-diphenylpyrrolidine (11).**



Reaction conducted on 0.5 mmol scale in dioxane with 3 mol% [Rh] for 14 h at 100 °C according to the general procedure. The indicated compound was purified by flash chromatography on silica gel (20% EtOAc/hexanes→60% EtOAc→100:2 EtOAc:Et<sub>3</sub>N) and obtained in a 64% yield (84 mg) as a colorless oil (as the mixture indicated). <sup>1</sup>H NMR (500 MHz, CDCl<sub>3</sub>) data for (*E*)-4,4-diphenyl-2-(prop-1-enyl)pyrrolidine: δ 7.27 (m, 10H), 5.51 (m, 2H), 4.13 (q, *J* = 8.5). <sup>1</sup>H NMR data for 2-allyl-4,4-diphenylpyrrolidine: (500 MHz, CDCl<sub>3</sub>): δ 7.27 (m, 10H), 5.84 (dddd, *J* = 17.0, 10.0, 6.5, 6.5 Hz, 1H), 5.10 (d, *J* = 17.0 Hz, 1H), 5.05 (d, *J* = 10.0 Hz, 1H), 3.72 (d, *J* = 11.5 Hz, 1H), 3.45 (d, *J* = 11.5 Hz, 1H), 3.34 (m, 1H), 2.78 (m, 1H), 2.29 (m, 2H), 2.11 (dd, *J* = 13.0, 9.0 Hz, 1H), 1.93 (br s, 1H), <sup>13</sup>C NMR (125 MHz, CDCl<sub>3</sub>) (reported as the mixture): δ 147.7, 147.6, 147.0, 146.9, 136.2, 134.3, 134.1, 128.5, 128.4, 128.4, 127.1, 127.0, 127.0, 126.1, 125.1, 116.6, 59.6, 58.0, 57.8, 57.7, 57.2, 56.8, 56.8, 53.9, 45.8, 45.6, 44.8, 41.7, 17.8, 13.3. Anal. Calcd for C<sub>19</sub>H<sub>21</sub>N: C, 86.65; H, 8.04; N, 5.32. Found: C, 86.72; H, 7.93; N, 5.31.

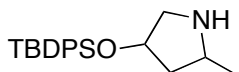

**4-(*tert*-butyldiphenylsilyloxy)-2-methylpyrrolidine (13a).** Reaction conducted on 0.25 mmol scale in *t*BuOH with 3 mol% [Rh] for 18 h at 70 °C according to the general procedure. The indicated compound was purified by flash chromatography on silica gel (33% EtOAc/hexanes→100% EtOAc→100:2 EtOAc:Et<sub>3</sub>N) and obtained in a 71% yield (60 mg, dr = 1.6:1) as a colorless oil. <sup>1</sup>H NMR (500 MHz, CDCl<sub>3</sub>, reported as a 1.2:1 mixture of diastereomers): δ 7.66 (m, 8H), 7.40 (m, 10H), 4.38 (m, 0.8H), 4.35 (m, 1H), 3.46 (m, 0.8H), 3.02 (m, 1.8H), 2.96 (d, *J* = 12.0 Hz, 1H), 2.85 (dd, *J* = 12.0, 2.5 Hz, 0.8H), 2.66 (dd, *J* = 12.0, 4.5 Hz, 1H), 2.01 (m, 1H), 1.90 (dd, *J* = 12.5, 5.5 Hz, 0.8H), 1.81 (br s, 1.8H), 1.37 (m, 1H), 1.26 (d, *J* = 6.5 Hz, 3H), 1.23 (m, overlapping, 0.8 H), 1.01 (d, *J* = 7.0 Hz, 2.4H). <sup>13</sup>C NMR (125 MHz, CDCl<sub>3</sub>): δ 135.9, 135.8, 135.8, 134.4, 134.4, 134.3, 75.5, 75.0, 56.7, 56.2, 54.3, 53.0, 44.5, 44.3, 27.0, 21.9, 21.5, 19.2, 19.2. Anal. Calcd for C<sub>21</sub>H<sub>28</sub>NOSi: C, 74.28; H, 8.61; N, 4.13 Found: C, 74.58; H, 8.84; N, 4.17. HRMS (ES+) *m/z* Calcd for C<sub>21</sub>H<sub>30</sub>NOSi [M+H]<sup>+</sup> 340.2097, found 340.2094.

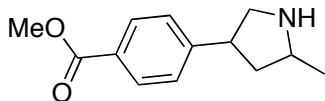

**2-Methyl-4-(4-methylcarboxyphenyl)pyrrolidine (13b).** Reaction conducted on 0.5 mmol scale in *t*BuOH with 3 mol% [Rh] for 21 h at 70 °C according to the general procedure except the reaction mixture was quenched with saturated aqueous NaHCO<sub>3</sub> instead of 1 M NaOH. The indicated compound was purified by flash chromatography on silica gel (60% EtOAc/hexanes→100% EtOAc→100:2 EtOAc:Et<sub>3</sub>N) and obtained in a 64% yield (70 mg, dr = 1.6:1) as a yellow oil. <sup>1</sup>H NMR (500 MHz, CDCl<sub>3</sub>, reported as a 1.7:1 mixture of diastereomers): δ 7.94 (d, *J* = 8.0 Hz, 3.2H), 7.29 (d, *J* = 8.0 Hz, 3.2H), 3.87 (s, 4.7H), 3.44 (m, 1.2H), 3.33 (m, 2.6H), 2.99 (ddd, *J* = 11.5, 6.5, 6.5 Hz, 1H), 2.83 (dd, *J* = 11.0, 8.5 Hz, 0.6H), 2.35 (m, 1H), 2.00 (app dt, *J* = 13.0, 7.0 Hz, 0.6H), 2.36 (br s, 1.6H), 1.80 (dddd, *J* = 13.0, 9.5, 7.0, 7.0 Hz, 0.6H), 1.39 (m, 1H), 1.24 (d, *J* = 6.0 Hz, 3H), 1.21 (d, *J* = 6.5 Hz, 1.8H). <sup>13</sup>C NMR (125 MHz, CDCl<sub>3</sub>, reported as a 1.7:1 mixture of diastereomers): δ 167.1, 150.3, 150.3, 129.8, 128.1, 127.3, 127.2, 55.8, 55.4, 54.9, 54.4, 52.0, 46.5, 45.5, 43.5, 42.0, 21.9, 21.4. Anal. Calcd for C<sub>13</sub>H<sub>17</sub>NO<sub>2</sub>: C, 71.21; H, 7.81; N, 6.39. Found: C, 71.06; H, 8.02; N, 6.69.

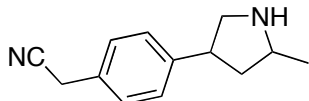

**2-Methyl-4-(4-cyanomethylphenyl)pyrrolidine (13c).** Reaction conducted on 0.5 mmol scale in *t*BuOH with 5 mol% [Rh] for 12.5 h at 70 °C according to the general procedure except the reaction mixture was quenched with saturated aqueous NaHCO<sub>3</sub> instead of 1 M NaOH. The indicated compound was purified by flash chromatography on silica gel (100% EtOAc→100:2 EtOAc:Et<sub>3</sub>N→100:3:2 CH<sub>2</sub>Cl<sub>2</sub>:MeOH:Et<sub>3</sub>N) and obtained in a 79% yield (80 mg, dr = 1.5:1) as a yellow oil. <sup>1</sup>H NMR (500 MHz, CDCl<sub>3</sub>, reported as a 1:1 mixture of diastereomers): δ 7.26 (m, 8 H), 4.26 (br s, 2H), 3.72 (s, 4H), 3.47 (m, 6H), 3.10 (dd, *J* = 10.5, 8.0 Hz, 1H), 2.92 (dd, *J* = 11.0, 9.0 Hz, 1H), 2.40 (ddd, *J* = 12.5, 6.5, 6.5 Hz, 1H), 2.05 (dt, *J* = 13.5, 8.0, 7.5 Hz, 1H), 1.89 (ddd, *J* = 13.0, 9.0, 6.5 Hz, 1H), 1.55 (app dt, *J* = 12.5, 10.5, 10.5 Hz, 1H), 1.38 (d, *J* = 6.0 Hz, 3H), 1.30 (d, *J* = 6.5 Hz, 3H). <sup>13</sup>C NMR (125 MHz, CDCl<sub>3</sub>): δ 143.8, 142.9, 128.3, 128.3, 128.2, 128.1, 128.1, 128.0, 118.0, 118.0, 55.8, 55.0, 54.9, 53.1, 45.2, 44.4, 42.9, 41.7, 23.4, 21.3, 20.3. HRMS

(ES+)  $m/z$  Calcd for  $C_{13}H_{16}N_2$   $[M+H]^+$  200.1392, found 200.1389.

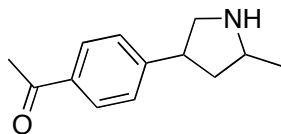

**2-Methyl-4-(4-acetylphenyl)pyrrolidine (13d).** Reaction conducted on 0.46 mmol scale in *t*BuOH with 5 mol% [Rh] for 16 h at 70 °C according to the general procedure. The indicated compound was purified by flash chromatography on silica gel (100% EtOAc  $\rightarrow$  100:2 EtOAc:Et<sub>3</sub>N  $\rightarrow$  100:3:2 CH<sub>2</sub>Cl<sub>2</sub>:MeOH:Et<sub>3</sub>N) and obtained in a 61% yield (57 mg, dr = 1.5:1) as a yellow oil. <sup>1</sup>H NMR (500 MHz, CDCl<sub>3</sub>, reported as a 2:1 mixture of diastereomers):  $\delta$  7.89 (d,  $J$  = 8.0 Hz, 3H), 7.33 (d,  $J$  = 8.5 Hz, 2H), 7.31 (d, overlapping,  $J$  = 8.0 Hz, 1H), 3.47 (m, 1H), 3.37 (m, 3H), 3.02 (m, 1H), 2.87 (dd,  $J$  = 10.5, 8.5 Hz, 0.5H), 2.59 (s, 4.5H), 2.38 (m, 1H), 2.14 (br s, 1.5H), 2.04 (m, 0.5H), 1.83 (ddd,  $J$  = 13.0, 9.5, 7.0 Hz, 0.5H), 1.44 (m, 1.5H), 1.27 (d,  $J$  = 6.5 Hz, 3H), 1.24 (d,  $J$  = 6.0 Hz, 1.5H). <sup>13</sup>C NMR (125 MHz, CDCl<sub>3</sub>):  $\delta$  197.9, 150.5, 135.4, 128.8, 127.6, 127.4, 55.8, 55.6, 55.0, 54.3, 46.4, 45.5, 43.5, 42.1, 26.7, 21.9, 21.4. HRMS (ES+)  $m/z$  Calcd for  $C_{13}H_{16}NO$   $[M+H]^+$  204.1388, found 204.1383.

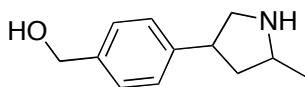

**2-Methyl-4-(4-hydroxymethylphenyl)pyrrolidine (13e).** Reaction conducted on 0.5 mmol scale in *t*BuOH with 5 mol% [Rh] for 8 h at 70 °C according to the general procedure. After cooling to room temperature, trimethoxybenzene (11.1 mg, 0.066 mmol) was added to the reaction mixture and worked up according to the general procedure. An NMR yield of 62% was obtained on the crude reaction mixture using the trimethoxybenzene as an internal standard. The indicated compound was purified by flash chromatography on silica gel (100% EtOAc  $\rightarrow$  100:2 EtOAc:Et<sub>3</sub>N  $\rightarrow$  100:2:2 CH<sub>2</sub>Cl<sub>2</sub>:MeOH:Et<sub>3</sub>N  $\rightarrow$  100:10:2 CH<sub>2</sub>Cl<sub>2</sub>:MeOH:Et<sub>3</sub>N) and obtained in a 56% yield (53 mg) as a colorless oil. <sup>1</sup>H NMR (500 MHz, CDCl<sub>3</sub>, reported as 1.4:1 mixture of diastereomers):  $\delta$  7.28 (d,  $J$  = 7.0 Hz, 3.4 H), 7.18 (d,  $J$  = 8.0 Hz, 2H), 7.16 (d,  $J$  = 8.0 Hz, 1.4 H), 4.62 (s, 3.4H), 3.64 (br s, 3.4H), 3.41 (m, 0.7H), 3.35 (overlapping m, 0.7H), 3.33 (overlapping dd,  $J$  = 11.0, 8.0 Hz, 1H), 3.25 (m, 2.4H), 2.87 (ddd,  $J$  = 12.5, 8.5, 6.0

Hz, 1H), 2.68 (dd,  $J = 10.5, 8.5$  Hz, 0.7H), 2.32 (m, 1H), 1.98 (m, 1H), 1.78 (ddd,  $J = 13.0, 9.5, 6.5$  Hz, 0.7H), 1.43 (ddd,  $J = 12.5, 12.5, 10.0$  Hz, 1H), 1.26 (d,  $J = 6.5$  Hz, 3H), 1.22 (d,  $J = 6.0$  Hz, 2.1H). This material contained 3% of an aldehyde byproduct and the desired amine product could not be isolated in analytically pure form. It was converted to the Boc carbamate **13e-Boc** and complete characterization data were obtained on this Boc-protected product (see below).

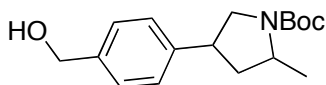

**2-Methyl-4-(4-hydroxymethylphenyl)-N-Boc-pyrrolidine (13e-Boc).** To a solution of 2-methyl-4-(4-hydroxymethylphenyl)-pyrrolidine **13e** (53 mg, 0.28 mmol) in EtOH (2.0 mL) was added NaHCO<sub>3</sub> (45 mg, 0.54 mmol) and Boc<sub>2</sub>O (71 mg, 0.32 mmol). After being stirred for 4.25 h at room temperature, the reaction mixture was quenched with water (×1), extracted with EtOAc (×2), dried with MgSO<sub>4</sub>, filtered, and concentrated *in vacuo*. The crude material was purified by flash chromatography on silica gel (25%→40% EtOAc/hexanes) to afford the product **13e-Boc** (61 mg, 75%) as a colorless oil. <sup>1</sup>H NMR (500 MHz, CDCl<sub>3</sub>, 55 °C, (reported as a 1.3:1 mixture of diastereomers): δ 7.31 (d,  $J = 8.0$  Hz, 3.6H), 7.22 (d,  $J = 8.0$  Hz, 3.6H), 4.66 (s, 3.6H), 4.06 (br s, 0.8H), 4.00 (br s, 0.8H), 3.92 (br s, 1H), 3.78 (dd,  $J = 10.0, 8.0$  Hz, 0.8H), 3.48 (m, 0.8H), 3.34 (br s, 0.8H), 3.21 (m, 2H), 2.49 (ddd,  $J = 10.0, 6.0, 6.0$  Hz, 1H), 2.15 (ddd,  $J = 11.5, 11.5, 8.0$  Hz, 0.8H), 1.92 (m, 2H), 1.68 (m, 1H), 1.48 (s, 9H), 1.48 (s, 7.2H), 1.34 (d,  $J = 6.0$  Hz, 3H), 1.27 (d,  $J = 6.0$  Hz, 2.4H). <sup>13</sup>C NMR (125 MHz, CDCl<sub>3</sub>, 55 °C, (reported as a 1.3:1 mixture of diastereomers): δ 154.8, 154.6, 141.2, 140.5, 139.8, 139.8, 127.43, 127.41, 127.38, 79.4, 79.3, 65.1, 53.8, 53.2, 52.9 (br), 42.8, 42.5, 41.3 (br), 28.7, 21.3 (br), 20.9 (br). Anal. Calcd for C<sub>17</sub>H<sub>25</sub>NO<sub>3</sub>: C, 70.07; H, 8.65; N, 4.81 Found: C, 69.87; H, 8.90; N, 4.66. HRMS (ES+)  $m/z$  Calcd for C<sub>17</sub>H<sub>26</sub>NO<sub>3</sub> [M+H]<sup>+</sup> 292.1913, found 292.1906.

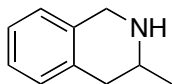

**3-Methyl-1,2,3,4-tetrahydroisoquinoline (15a).** Reaction conducted on 0.5 mmol scale in *t*BuOH with 1 mol% [Rh] for 5 h at 70 °C according to the general procedure. The

indicated compound was purified by flash chromatography on silica gel (50% EtOAc/hexanes→100% EtOAc→100:2 EtOAc:Et<sub>3</sub>N) and obtained in an 87% yield (67 mg) as a light yellow oil. Spectral data for this compound match literature values.<sup>15</sup> <sup>1</sup>H NMR (500 MHz, CDCl<sub>3</sub>): δ 7.12 (m, 2H), 7.06 (m, 1H), 7.01 (m, 1H), 4.10 (d, *J* = 16.0 Hz, 1H), 4.03 (d, *J* = 16.0 Hz, 1H), 3.01 (ddq, *J* = 10.5, 6.0, 4.0 Hz, 1H), 2.77 (dd, *J* = 16.0 Hz, 4.0 Hz, 1H), 2.50 (d, *J* = 16.0, 10.5 Hz, 1H), 2.12 (br s, 1H), 1.24 (d, *J* = 6.0 Hz, 3H). <sup>13</sup>C NMR (125 MHz, CDCl<sub>3</sub>): δ 135.5, 135.1, 129.3, 126.3, 126.2, 126.0, 49.4, 48.7, 37.4, 22.7. (The reaction was also carried out at room temperature on 0.52 mmol scale using 10 mol % [Rh] for 24 h in THF to afford the product (59 mg) in 77% isolated yield).

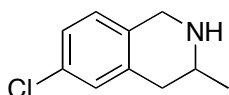

**6-Chloro-3-methyl-tetrahydroisoquinoline (15b).** Reaction conducted on 0.5 mmol scale in *t*BuOH with 2 mol% [Rh] for 6 h at 70 °C according to the general procedure. The indicated compound was purified by flash chromatography on silica gel (20%→66% EtOAc/hexanes→100:2 EtOAc:Et<sub>3</sub>N) and obtained in an 84% yield (76 mg) as a light yellow oil. <sup>1</sup>H NMR (500 MHz, CDCl<sub>3</sub>): δ 7.07 (d, *J* = 8.5 Hz, 1H), 7.05 (s, 1H), 6.94 (d, *J* = 8.5 Hz, 1H), 4.04 (d, *J* = 16.0 Hz, 1H), 3.99 (d, *J* = 16.0 Hz, 1H), 2.98 (m, 1H), 2.73 (dd, *J* = 166.5, 3.5 Hz, 1H), 2.46 (dd, *J* = 16.5, 11.0 Hz, 1H), 1.51 br s, 1H), 1.23 (d, *J* = 6.5 Hz, 3H). <sup>13</sup>C NMR (125 MHz, CDCl<sub>3</sub>): δ 137.0, 133.0, 131.5, 128.9, 127.4, 125.9, 49.0, 48.3, 37.1, 22.5. Anal. Calcd for C<sub>10</sub>H<sub>12</sub>ClN: C, 66.12; H, 6.66; N, 7.71 Found: C, 66.40; H, 6.80; N, 7.95.

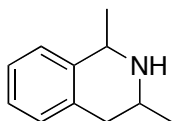

**1,3-dimethyltetrahydroisoquinoline (17).** Reaction conducted on 0.5 mmol scale in *t*BuOH with 1 mol% [Rh] for 7 h at 70 °C according to the general procedure. The indicated compound was purified by flash chromatography on silica gel (60%→100% EtOAc/hexanes→100:2 EtOAc:Et<sub>3</sub>N) and obtained in a 74% yield (59 mg, dr = 1.1:1) as a light yellow oil. Spectral data for this compound match literature values.<sup>16</sup> <sup>1</sup>H NMR (500 MHz, CDCl<sub>3</sub>, reported as a 1.2:1 mixture of diastereomers): δ 7.13 (m, 8.4H), 4.24

(q,  $J = 7.0$  Hz, 1.2H), 4.16 (q,  $J = 6.0$  Hz, 1H), 3.29 (ddq,  $J = 10.0, 6.5, 4.5$  Hz, 1.2 H), 3.06 (ddq,  $J = 10.0, 6.5, 4.0$  Hz, 1H), 3.16 (dd,  $J = 16.5, 4.5$  Hz, 1.2H), 2.75 (dd,  $J = 16.0, 3.5$  Hz, 1H), 2.57 (dd,  $J = 16.0, 11.0$  Hz, 1H), 2.46 (dd,  $J = 16.0, 10.0$  Hz, 1.2H), 1.54 (br s, 2.2 H), 1.48 (d,  $J = 6.5$  Hz, 3H), 1.46 (d,  $J = 7.0$  Hz, 3.6H), 1.25 (d,  $J = 6.5$  Hz, 3H), 1.22 (d,  $J = 6.5$  Hz, 3.6H).  $^{13}\text{C}$  NMR (125 MHz,  $\text{CDCl}_3$ ):  $\delta$  140.1, 140.0, 135.2, 134.5, 129.2, 129.0, 126.7, 126.0, 126.0, 125.9, 125.7, 125.2, 52.7, 50.9, 49.1, 42.8, 38.4, 37.6, 24.3, 22.7, 22.5, 22.4.

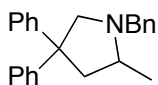

***N*-Benzyl-2-methyl-4,4-diphenylpyrrolidine (19).** Reaction conducted on 0.5 mmol scale in *t*BuOH with 1 mol% [Rh] according to the general procedure. The indicated compound was purified by flash chromatography on silica gel (10% EtOAc/hexanes) and obtained in an 83% yield (107 mg) as a colorless oil. Spectral data for this compound match literature values.<sup>11</sup>  $^1\text{H}$  NMR (500 MHz,  $\text{CDCl}_3$ ):  $\delta$  7.38 (d,  $J = 7.5$  Hz, 2H), 7.33 (t,  $J = 7.5$  Hz, 3H), 7.22 (m, 10H), 7.12 (t,  $J = 7.0$  Hz, 1H), 4.10 (d,  $J = 13.0$  Hz, 1H), 3.64 (d,  $J = 10.0$  Hz, 1H), 3.26 (d,  $J = 13.5$  Hz, 1H), 2.93 (dd,  $J = 13.0, 7.5$  Hz, 1H), 2.83 (m, 1H), 2.79 (d,  $J = 9.5$  Hz, 1H), 2.21 (dd,  $J = 13.0, 7.5$  Hz, 1H), 1.18 (d,  $J = 5.5$  Hz, 3H).  $^{13}\text{C}$  NMR (125 MHz,  $\text{CDCl}_3$ ):  $\delta$  150.8, 148.8, 140.2, 128.7, 128.3, 128.0, 127.6, 127.4, 126.9, 125.9, 125.5, 66.6, 59.8, 58.1, 52.6, 48.1, 19.6.

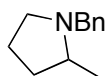

***N*-Benzyl-2-methylpyrrolidine (21).** Reaction conducted on 0.5 mmol scale in *t*BuOH with 3 mol% [Rh] according to the general procedure with the following modification: After cooling to room temperature, trimethoxybenzene (9.6 mg, 0.057 mmol) was added to the reaction mixture. The indicated compound was obtained in a 65% NMR yield based on relative integrations to trimethoxybenzene as the internal standard. Spectral data for this compound match literature values.<sup>17</sup>  $^1\text{H}$  NMR (500 MHz,  $\text{CDCl}_3$ ):  $\delta$  7.31 (m, 5H), 4.04 (d,  $J = 12.5$  Hz, 1H), 3.16 (d,  $J = 12.5$  Hz, 1H), 2.93 (dt,  $J = 9.5, 2.5$  Hz, 1H), 2.41 (m, 1H), 2.12 (q,  $J = 9.0$  Hz, 1H), 1.96 (m, 1H), 1.69 (m, 2H), 1.52 (m, 1H), 1.20 (d,  $J = 6.0$  Hz, 3H).

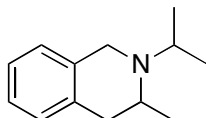

***N*-Isopropyl-3-methyl-tetrahydroisoquinoline (23a).** Reaction conducted on 0.5 mmol scale in *t*BuOH with 1 mol% [Rh] for 8 h at 70 °C according to the general procedure. The indicated compound was purified by flash chromatography on silica gel (20% EtOAc/hexanes→100% EtOAc) and obtained in a 76% yield (73 mg, run 1) and 80% yield (75 mg, run 2) as a colorless oil. <sup>1</sup>H NMR (500 MHz, CDCl<sub>3</sub>): δ 7.11 (m, 2H), 7.05 (m, 2H), 3.76 (s, 2H), 3.15 (m, 2H), 2.95 (dd, *J* = 16.0, 4.5 Hz, 1H), 2.63 (dd, *J* = 16.0, 7.0 Hz, 1H), 1.22 (d, *J* = 6.5 Hz, 3H), 1.11 (d, *J* = 6.5 Hz, 3H), 1.05 (d, *J* = 6.5 Hz, 3H). <sup>13</sup>C NMR (125 MHz, CDCl<sub>3</sub>): δ 135.3, 134.3, 128.7, 126.4, 126.0, 125.5, 49.8, 49.2, 46.7, 37.7, 21.8, 16.9, 16.4. Anal. Calcd for C<sub>13</sub>H<sub>19</sub>N: C, 82.48; H, 10.12; N, 7.40 Found: C, 82.21; H, 10.00; N, 7.45.

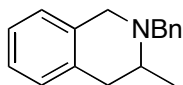

***N*-Benzyl-3-methyl-tetrahydroisoquinoline (23b).** Reaction conducted on 0.5 mmol scale in *t*BuOH with 1 mol% [Rh] for 5 h at 70 °C according to the general procedure. The indicated compound was purified by flash chromatography on silica gel (10% →20% EtOAc/hexanes) and obtained in an 86% yield (101 mg) as a colorless oil. Spectral data for this compound match literature values.<sup>18</sup> <sup>1</sup>H NMR (500 MHz, CDCl<sub>3</sub>): δ 7.47 (d, *J* = 7.5 Hz, 2H), 7.40 (t, *J* = 7.5 Hz, 2H), 7.33 (t, *J* = 7.0 Hz, 1H), 7.19 (m, 3H), 7.02 (t, *J* = 7.5 Hz, 1H), 3.91 (d, *J* = 13.5 Hz, 1H), 3.79 (d, *J* = 15.5 Hz, 1H), 3.70 (d, *J* = 16.0 Hz, 1H), 3.66 (d, *J* = 13.0 Hz, 1H), 3.20 (m, 1H), 3.10 (dd, *J* = 16.5, 5.0 Hz, 1H), 2.70 (dd, *J* = 16.5, 6.0 Hz, 1H), 1.23 (d, *J* = 6.5 Hz, 3H). <sup>13</sup>C NMR (125 MHz, CDCl<sub>3</sub>): δ 139.6, 134.5, 134.1, 129.1, 129.0, 128.4, 127.0, 126.5, 126.1, 125.6, 57.4, 52.2, 51.7, 35.7, 15.2. (The reaction was also carried out at room temperature on 0.51 mmol scale using 10 mol% [Rh] for 24 h in THF to afford the product (89 mg) in 74% isolated yield).

#### ***Kinetic Data:***

**Representative Procedure for Conducting Kinetic Measurements:**

[Rh(CH<sub>3</sub>CN)<sub>2</sub>COD]BF<sub>4</sub> (8.7 mg, 0.023 mmol, 5 mol %), **L1** (18.5 mg, 0.0276 mmol, 6 mol %), and trimethoxybenzene (11.7 mg, 0.0696 mmol) were added to a 1 mL volumetric flask and diluted with ~0.2 mL of *t*-BuOH-*d*<sub>9</sub>. In a separate vial, the substrate (75 mg, 0.46 mmol) was dissolved in ~0.5 mL of *t*-BuOH-*d*<sub>9</sub> and filtered through a cotton plug directly into the volumetric flask. The volumetric flask was filled to the line with solvent, mixed thoroughly, and a portion (~0.6 mL) of this solution was transferred to a screw-capped NMR tube. The tube was sealed with a teflon-lined screw cap and removed from the glovebox. Kinetic data were immediately recorded by <sup>1</sup>H NMR spectroscopy at 61 °C for at least 3 half-lives using an automated program.

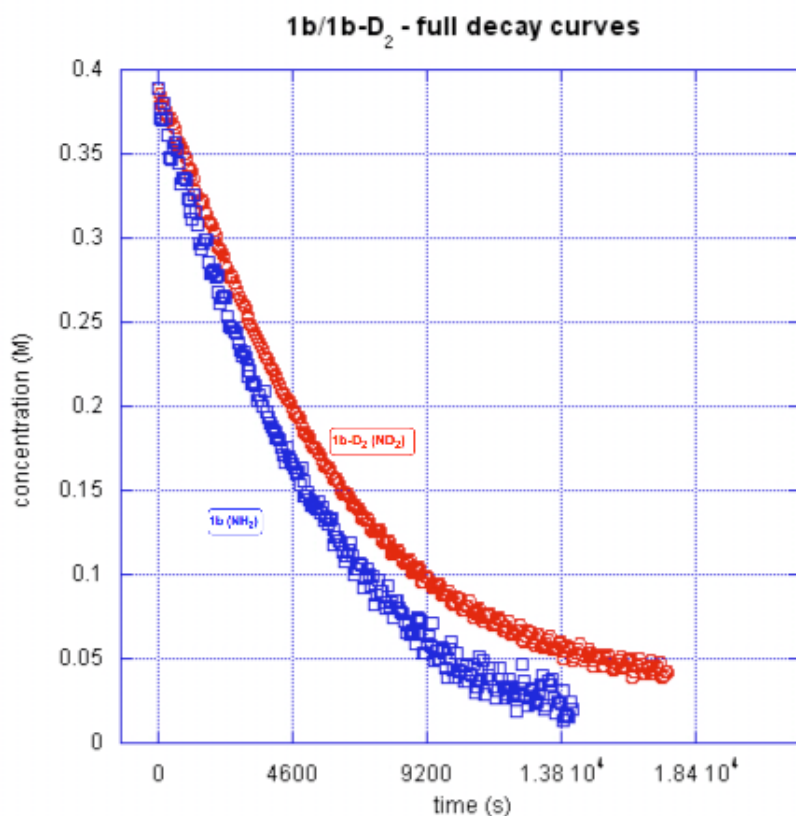

**Figure SI-1.** Overlay of full decay curves for primary amines **1b/1b-D<sub>2</sub>** in BuOH-*d*<sub>9</sub>/BuOH-*d*<sub>10</sub>.

The full decay curves shown in Figure SI-1 deviate from the expected zero-order kinetic behavior due to formation of the imine complex [(**L1**)Rh(**3a**)]BF<sub>4</sub> as the hydroamination reaction proceeds toward complete conversion of aminoalkene. The



reaction rate decreases as the concentration of the imine complex increases and this results in curvature of the full time course plots. Due to this complex kinetic behavior, the KIE for **1b/1b-D<sub>2</sub>** was determined from initial rate data shown in Figure SI-2.

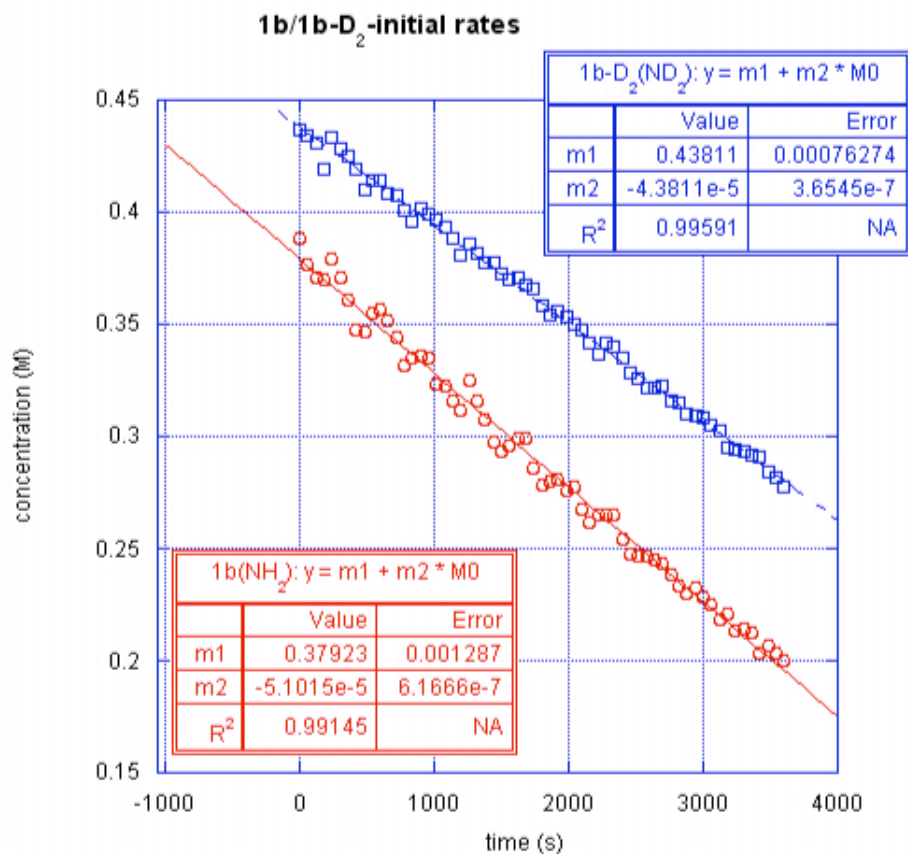

**Figure SI-2.** Initial rate data used to determine the KIE for **1b/1b-D<sub>2</sub>** (KIE = 1.16 ± 0.10)

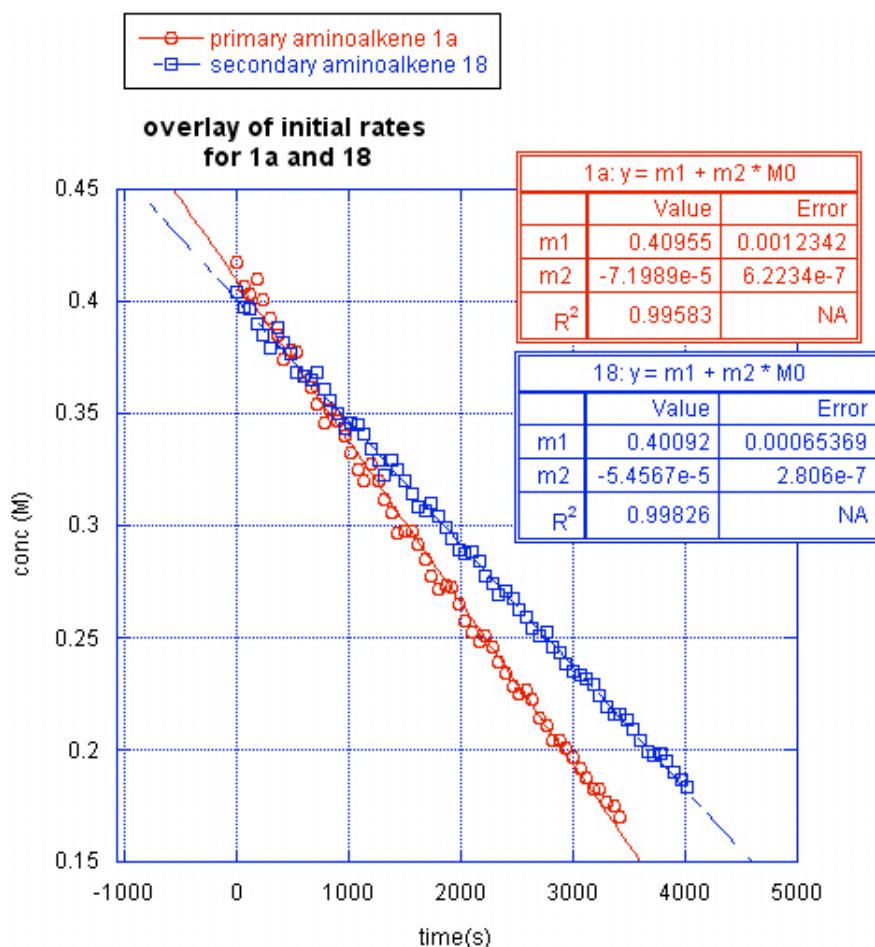

**Figure SI-3.** Initial rate data used to determine the relative rates of cyclization for primary amine **1a** and secondary amine **18** ( $k_{1a}/k_{18} = 1.3$ )

#### References:

- (1) Bender, C. F.; Widenhofer, R. A. *J. Am. Chem. Soc.* **2005**, *127*, 1070.
- (2) Michael, F. E.; Cochran, B. M. *J. Am. Chem. Soc.*, **2006**, *128*, 4246.
- (3) Maruyama, K.; Nagai, N.; Naruta, Y. *J. Org. Chem.* **1986**, *51*, 5083.
- (4) Gribkov, D. V.; Hultsch, K. C. *Angew. Chem. Int. Ed. Engl.* **2004**, *43*, 5542.
- (5) Johns, A. M.; Sakai, N.; Ridder, A.; Hartwig, J. F. *J. Am. Chem. Soc.* **2006**, *128*, 9306.
- (6) Kuwano, R.; Kusano, H. *Chem. Lett.* **2007**, *36*, 528.
- (7) Amigues, E. J.; Hardacre, C.; Keane, G.; Migaud, M. E. *Green Chemistry* **2008**, *10*, 660.
- (8) Muniz, K.; Streuff, J.; Chavez, P.; Hovelmann, C. H.; *Chem. Asian J.* **2008**, *3*, 1248.
- (9) Inoue, A.; Kitagawa, K.; Shinokubo, H.; Oshima, K. *J. Org. Chem.* **2001**, *66*, 4333.
- (10) Bender, C. F.; Widenhofer, R. A. *Chem. Commun.* **2008**, 2741.
- (11) Liu, Z.; Hartwig, J. F. *J. Am. Chem. Soc.* **2008**, *130*, 1570.
- (12) Cariou, M.; Hazard, R.; Jubault, M.; Tallec, A. *Can. J. Chem.* **1983**, *61*, 2359.
- (13) Beak, P.; Lee, W. K. *J. Org. Chem.* **1993**, *58*, 1109.
- (14) Aillaud, I.; Collin, J.; Duhayon, C.; Guillot, R.; Lyubov, D.; Schulz, E.; Trifonov, A.

*Chem. Eur. J.* **2008**, *14*, 2189.

(15) Pitts, M. R.; Harrison, J. R.; Moody, C. J. *J. Chem. Soc. Perkin Trans. 1*, **2001**, 955.

(16) Toda, J.; Matsumoto, S; Saitoh, T.; Sano, T. *Chem. Pharm. Bull.* **2000**, *48*, 91.

(17) Ackermann, L.; Kaspar, L. T.; Althammer, A. *Org. Biomol. Chem.*, **2007**, *5*, 1975.

(18) Wu, J.; Liao, J.; Zhu, J.; Deng, J. *Synlett*, **2006**, *13*, 2059.

*Crystallographic data for [(L1')Rh-NCMe]BF<sub>4</sub>*

Table SI-1. Crystal data and structure refinement for [(L1')Rh-NCMe]BF<sub>4</sub>

|                                   |                                                                                     |                                          |
|-----------------------------------|-------------------------------------------------------------------------------------|------------------------------------------|
| Identification code               | ba81da                                                                              |                                          |
| Empirical formula                 | C <sub>33</sub> H <sub>55</sub> B F <sub>4</sub> N <sub>5</sub> O P <sub>2</sub> Rh |                                          |
| Formula weight                    | 789.48                                                                              |                                          |
| Temperature                       | 193(2) K                                                                            |                                          |
| Wavelength                        | 0.71073 Å                                                                           |                                          |
| Crystal system                    | Monoclinic                                                                          |                                          |
| Space group                       | P 21/c                                                                              |                                          |
| Unit cell dimensions              | a = 19.3079(12) Å<br>b = 16.9887(11) Å<br>c = 24.5185(17) Å                         | a = 90°.<br>b = 104.227(5)°.<br>g = 90°. |
| Volume                            | 7795.8(9) Å <sup>3</sup>                                                            |                                          |
| Z                                 | 8                                                                                   |                                          |
| Density (calculated)              | 1.345 Mg/m <sup>3</sup>                                                             |                                          |
| Absorption coefficient            | 0.571 mm <sup>-1</sup>                                                              |                                          |
| F(000)                            | 3296                                                                                |                                          |
| Crystal size                      | 0.11 x 0.08 x 0.04 mm <sup>3</sup>                                                  |                                          |
| Theta range for data collection   | 1.47 to 20.81°.                                                                     |                                          |
| Index ranges                      | -17<=h<=19, -16<=k<=16, -24<=l<=22                                                  |                                          |
| Reflections collected             | 80549                                                                               |                                          |
| Independent reflections           | 8164 [R(int) = 0.2497]                                                              |                                          |
| Completeness to theta = 20.81°    | 100.0 %                                                                             |                                          |
| Absorption correction             | Integration                                                                         |                                          |
| Max. and min. transmission        | 0.9794 and 0.9383                                                                   |                                          |
| Refinement method                 | Full-matrix least-squares on F <sup>2</sup>                                         |                                          |
| Data / restraints / parameters    | 8164 / 2622 / 1345                                                                  |                                          |
| Goodness-of-fit on F <sup>2</sup> | 0.989                                                                               |                                          |
| Final R indices [I>2sigma(I)]     | R1 = 0.0762, wR2 = 0.1877                                                           |                                          |
| R indices (all data)              | R1 = 0.2036, wR2 = 0.2532                                                           |                                          |
| Largest diff. peak and hole       | 0.608 and -0.556 e.Å <sup>-3</sup>                                                  |                                          |

Table SI-2. Atomic coordinates ( x 10<sup>4</sup>) and equivalent isotropic displacement parameters (Å<sup>2</sup>x 10<sup>3</sup>) for [(L1')Rh-NCMe]BF<sub>4</sub>. U(eq) is defined as one third of the trace of the orthogonalized U<sup>ij</sup> tensor.

|       | x        | y        | z        | U(eq)  |
|-------|----------|----------|----------|--------|
| C(1)  | 5639(5)  | 4338(8)  | 2251(4)  | 44(4)  |
| C(2)  | 5528(6)  | 4126(8)  | 1702(5)  | 52(4)  |
| C(3)  | 6051(6)  | 4337(9)  | 1400(5)  | 73(5)  |
| C(4)  | 6671(6)  | 4714(9)  | 1681(6)  | 72(5)  |
| C(5)  | 6766(6)  | 4905(8)  | 2237(5)  | 56(5)  |
| C(6)  | 6281(6)  | 4734(8)  | 2539(5)  | 53(4)  |
| C(7)  | 6404(5)  | 4969(8)  | 3141(5)  | 48(4)  |
| C(8)  | 5799(5)  | 4728(8)  | 3408(5)  | 54(5)  |
| C(9)  | 5815(6)  | 4901(9)  | 3962(5)  | 66(5)  |
| C(10) | 5272(7)  | 4696(10) | 4207(5)  | 82(6)  |
| C(11) | 4655(7)  | 4329(9)  | 3886(5)  | 78(6)  |
| C(12) | 4618(6)  | 4154(8)  | 3320(5)  | 53(4)  |
| C(13) | 5191(6)  | 4362(8)  | 3102(5)  | 47(4)  |
| C(14) | 6505(8)  | 5859(9)  | 3195(7)  | 70(5)  |
| C(15) | 7085(8)  | 4534(12) | 3497(7)  | 99(7)  |
| N(1)  | 4366(6)  | 4185(5)  | 791(4)   | 75(3)  |
| C(16) | 3693(7)  | 3922(9)  | 394(5)   | 82(4)  |
| C(17) | 3617(12) | 4250(16) | -194(5)  | 88(5)  |
| C(18) | 4442(8)  | 5054(6)  | 870(7)   | 83(4)  |
| C(19) | 3927(12) | 5384(11) | 1192(10) | 91(5)  |
| N(2)  | 4892(7)  | 2781(5)  | 1054(4)  | 78(3)  |
| C(20) | 5255(8)  | 2776(8)  | 590(5)   | 80(4)  |
| C(21) | 4950(12) | 2160(11) | 146(6)   | 81(5)  |
| C(22) | 4866(8)  | 2026(6)  | 1352(6)  | 82(3)  |
| C(23) | 5521(11) | 1913(12) | 1841(8)  | 88(4)  |
| N(3)  | 3108(4)  | 4196(5)  | 2874(7)  | 90(3)  |
| C(24) | 2402(5)  | 3900(10) | 2549(8)  | 98(5)  |
| C(25) | 1829(7)  | 4000(30) | 2874(12) | 103(5) |
| C(26) | 3174(10) | 5069(6)  | 2912(7)  | 95(4)  |
| C(27) | 3066(18) | 5450(12) | 2336(9)  | 97(5)  |
| N(4)  | 3770(5)  | 2891(5)  | 3289(5)  | 98(3)  |
| C(28) | 4428(6)  | 2462(8)  | 3590(7)  | 105(4) |
| C(29) | 4586(12) | 1775(11) | 3240(11) | 106(4) |

|       |           |          |          |         |
|-------|-----------|----------|----------|---------|
| C(30) | 3131(7)   | 2373(10) | 3093(6)  | 102(4)  |
| C(31) | 2944(11)  | 1951(15) | 3589(9)  | 104(5)  |
| N(5)  | 3309(6)   | 3016(7)  | 1666(5)  | 56(4)   |
| C(32) | 2808(8)   | 2690(9)  | 1446(6)  | 50(5)   |
| C(33) | 2181(7)   | 2251(9)  | 1158(7)  | 84(6)   |
| O(1)  | 5109(4)   | 4146(5)  | 2524(4)  | 48(3)   |
| P(1)  | 4704(2)   | 3609(2)  | 1349(2)  | 55(1)   |
| P(2)  | 3835(2)   | 3660(2)  | 2879(2)  | 54(1)   |
| Rh(1) | 4170(1)   | 3560(1)  | 2068(1)  | 53(1)   |
| C(34) | 9059(8)   | 1054(7)  | 4030(5)  | 71(6)   |
| C(35) | 9302(8)   | 1475(8)  | 3643(6)  | 82(6)   |
| C(36) | 9573(10)  | 1056(9)  | 3230(7)  | 129(9)  |
| C(37) | 9609(12)  | 242(9)   | 3247(8)  | 155(11) |
| C(38) | 9384(11)  | -154(8)  | 3658(8)  | 125(9)  |
| C(39) | 9072(9)   | 210(9)   | 4031(7)  | 104(8)  |
| C(40) | 8799(8)   | -254(7)  | 4452(6)  | 98(7)   |
| C(41) | 8661(8)   | 254(8)   | 4931(6)  | 79(6)   |
| C(42) | 8498(10)  | -72(8)   | 5399(6)  | 100(7)  |
| C(43) | 8348(12)  | 380(10)  | 5821(7)  | 134(9)  |
| C(44) | 8329(10)  | 1202(9)  | 5774(7)  | 111(8)  |
| C(45) | 8472(9)   | 1554(8)  | 5293(6)  | 81(6)   |
| C(46) | 8650(7)   | 1063(8)  | 4897(6)  | 68(6)   |
| C(47) | 8083(8)   | -660(10) | 4160(8)  | 94(7)   |
| C(48) | 9319(9)   | -920(12) | 4708(9)  | 123(8)  |
| N(6)  | 8802(5)   | 2770(6)  | 3000(4)  | 133(3)  |
| C(49) | 8172(6)   | 2266(8)  | 2744(7)  | 139(4)  |
| C(50) | 7523(7)   | 2502(17) | 2957(11) | 146(5)  |
| C(51) | 8698(12)  | 3626(6)  | 2862(5)  | 137(4)  |
| C(52) | 8694(16)  | 3787(11) | 2248(7)  | 138(4)  |
| N(7)  | 10058(4)  | 2937(7)  | 3701(6)  | 104(3)  |
| C(53) | 10440(9)  | 3366(8)  | 4213(6)  | 107(4)  |
| C(54) | 10548(14) | 4230(8)  | 4092(11) | 108(6)  |
| C(55) | 10496(7)  | 2679(12) | 3315(6)  | 110(4)  |
| C(56) | 11072(11) | 2090(15) | 3594(12) | 115(6)  |
| N(8)  | 7578(4)   | 2891(10) | 5161(4)  | 95(3)   |
| C(57) | 7122(7)   | 3168(9)  | 4622(5)  | 99(3)   |

|       |          |          |          |        |
|-------|----------|----------|----------|--------|
| C(58) | 6697(12) | 2510(13) | 4275(8)  | 105(5) |
| C(59) | 7250(8)  | 2825(10) | 5644(6)  | 102(4) |
| C(60) | 6948(13) | 3611(12) | 5786(10) | 108(5) |
| N(9)  | 8860(5)  | 2954(6)  | 5831(4)  | 97(3)  |
| C(61) | 9511(6)  | 2527(8)  | 6140(6)  | 103(4) |
| C(62) | 10156(7) | 2728(17) | 5916(10) | 101(4) |
| C(63) | 8870(12) | 3822(6)  | 5924(5)  | 99(4)  |
| C(64) | 8961(17) | 4024(11) | 6545(7)  | 102(5) |
| N(10) | 8841(7)  | 3837(9)  | 4413(6)  | 74(5)  |
| C(65) | 8850(9)  | 4516(13) | 4415(8)  | 70(6)  |
| C(66) | 8882(10) | 5370(11) | 4384(8)  | 111(7) |
| O(2)  | 8804(5)  | 1472(6)  | 4450(5)  | 68(3)  |
| P(3)  | 9257(2)  | 2547(3)  | 3659(2)  | 78(2)  |
| P(4)  | 8413(2)  | 2616(3)  | 5204(2)  | 69(2)  |
| Rh(2) | 8832(1)  | 2727(1)  | 4428(1)  | 66(1)  |
| F(1)  | 1633(6)  | 756(8)   | 1970(5)  | 140(4) |
| F(2)  | 1587(7)  | 859(8)   | 2858(4)  | 148(5) |
| F(3)  | 576(5)   | 891(9)   | 2176(6)  | 156(5) |
| F(4)  | 1333(8)  | 1899(6)  | 2278(6)  | 143(5) |
| B(1)  | 1279(5)  | 1103(6)  | 2323(5)  | 138(4) |
| F(5)  | 3437(6)  | 810(12)  | 9828(7)  | 184(5) |
| F(6)  | 2633(9)  | 784(12)  | 10345(6) | 194(4) |
| F(7)  | 2838(10) | 1900(7)  | 9943(8)  | 211(4) |
| F(8)  | 2275(8)  | 915(13)  | 9417(6)  | 211(6) |
| B(2)  | 2798(6)  | 1102(8)  | 9882(5)  | 192(5) |
| N(11) | 4316(7)  | 4057(8)  | 749(4)   | 77(3)  |
| C(67) | 4664(8)  | 4094(16) | 276(5)   | 78(4)  |
| C(68) | 4135(15) | 3980(30) | -291(5)  | 82(5)  |
| C(69) | 3728(8)  | 4625(8)  | 737(9)   | 82(3)  |
| C(70) | 3988(17) | 5475(8)  | 745(19)  | 87(5)  |
| N(12) | 5021(7)  | 2787(6)  | 1121(6)  | 80(3)  |
| C(71) | 4512(8)  | 2239(10) | 753(9)   | 80(4)  |
| C(72) | 4864(18) | 1787(18) | 356(13)  | 81(5)  |
| C(73) | 5666(8)  | 2406(8)  | 1488(12) | 85(4)  |
| C(74) | 5511(18) | 1562(13) | 1634(18) | 85(5)  |
| N(13) | 3147(5)  | 4221(8)  | 2920(5)  | 89(3)  |

|       |           |          |           |        |
|-------|-----------|----------|-----------|--------|
| C(75) | 2932(6)   | 4345(13) | 3452(5)   | 92(4)  |
| C(76) | 2150(8)   | 4140(20) | 3397(10)  | 103(5) |
| C(77) | 2861(7)   | 4791(10) | 2460(7)   | 93(4)  |
| C(78) | 2063(8)   | 4693(18) | 2218(11)  | 105(6) |
| N(14) | 3690(7)   | 2815(6)  | 3175(6)   | 100(4) |
| C(79) | 4000(7)   | 2069(7)  | 3031(9)   | 105(4) |
| C(80) | 4812(8)   | 2091(18) | 3170(20)  | 106(5) |
| C(81) | 3443(9)   | 2817(13) | 3702(6)   | 102(4) |
| C(82) | 2690(11)  | 2480(30) | 3613(12)  | 104(5) |
| N(15) | 8809(7)   | 2905(9)  | 3034(5)   | 135(4) |
| C(83) | 8046(7)   | 2671(15) | 2828(6)   | 138(4) |
| C(84) | 7819(13)  | 2620(30) | 2191(7)   | 139(5) |
| C(85) | 8970(11)  | 3735(10) | 2905(10)  | 137(4) |
| C(86) | 9501(17)  | 3770(20) | 2536(15)  | 138(5) |
| N(16) | 10073(8)  | 2870(20) | 3657(16)  | 104(4) |
| C(87) | 10583(11) | 3100(20) | 4159(18)  | 108(4) |
| C(88) | 11040(20) | 2410(20) | 4332(15)  | 113(7) |
| C(89) | 10228(16) | 2860(30) | 3051(15)  | 113(5) |
| C(90) | 10690(20) | 3540(20) | 2996(15)  | 116(7) |
| N(17) | 7565(4)   | 2889(6)  | 5160(9)   | 96(3)  |
| C(91) | 6974(7)   | 2366(10) | 4857(9)   | 102(4) |
| C(92) | 6721(14)  | 1817(14) | 5259(14)  | 112(6) |
| C(93) | 7400(8)   | 3749(7)  | 5096(12)  | 99(4)  |
| C(94) | 6811(15)  | 3985(13) | 5378(18)  | 105(5) |
| N(18) | 8867(6)   | 3098(11) | 5773(5)   | 97(4)  |
| C(95) | 9658(6)   | 3150(15) | 5877(8)   | 100(4) |
| C(96) | 10029(12) | 2590(20) | 6345(13)  | 103(5) |
| C(97) | 8582(11)  | 3106(12) | 6284(6)   | 97(4)  |
| C(98) | 8589(19)  | 3929(15) | 6533(12)  | 99(5)  |
| F(9)  | 1796(7)   | 1399(11) | 2173(9)   | 140(4) |
| F(10) | 1638(11)  | 451(12)  | 2743(7)   | 145(7) |
| F(11) | 742(7)    | 1285(13) | 2386(10)  | 145(5) |
| F(12) | 1077(13)  | 410(11)  | 1826(7)   | 152(6) |
| B(3)  | 1309(7)   | 883(9)   | 2284(6)   | 137(5) |
| F(13) | 3290(8)   | 933(17)  | 9647(9)   | 191(5) |
| F(14) | 2462(12)  | 447(11)  | 10030(11) | 198(6) |



|       |          |          |          |        |
|-------|----------|----------|----------|--------|
| F(15) | 3086(14) | 1511(14) | 10409(8) | 207(6) |
| F(16) | 2292(11) | 1609(15) | 9583(11) | 214(5) |
| B(4)  | 2779(8)  | 1126(11) | 9921(7)  | 198(5) |

Table SI-3. Bond lengths [ $\text{\AA}$ ] and angles [ $^\circ$ ] for  $[(\mathbf{L1}')\text{Rh-NCMe}]\text{BF}_4$ .

---

|              |           |
|--------------|-----------|
| C(1)-C(2)    | 1.358(13) |
| C(1)-O(1)    | 1.393(13) |
| C(1)-C(6)    | 1.435(14) |
| C(2)-C(3)    | 1.438(14) |
| C(2)-P(1)    | 1.836(11) |
| C(3)-C(4)    | 1.383(15) |
| C(3)-H(3A)   | 0.9500    |
| C(4)-C(5)    | 1.370(15) |
| C(4)-H(4A)   | 0.9500    |
| C(5)-C(6)    | 1.360(14) |
| C(5)-H(5A)   | 0.9500    |
| C(6)-C(7)    | 1.491(14) |
| C(7)-C(8)    | 1.528(14) |
| C(7)-C(14)   | 1.526(18) |
| C(7)-C(15)   | 1.573(18) |
| C(8)-C(13)   | 1.376(13) |
| C(8)-C(9)    | 1.383(14) |
| C(9)-C(10)   | 1.374(15) |
| C(9)-H(9A)   | 0.9500    |
| C(10)-C(11)  | 1.402(15) |
| C(10)-H(10A) | 0.9500    |
| C(11)-C(12)  | 1.403(14) |
| C(11)-H(11A) | 0.9500    |
| C(12)-C(13)  | 1.389(14) |
| C(12)-P(2)   | 1.831(12) |
| C(13)-O(1)   | 1.433(13) |
| C(14)-H(14A) | 0.9800    |
| C(14)-H(14B) | 0.9800    |
| C(14)-H(14C) | 0.9800    |
| C(15)-H(15A) | 0.9800    |

|              |           |
|--------------|-----------|
| C(15)-H(15B) | 0.9800    |
| C(15)-H(15C) | 0.9800    |
| N(1)-C(16)   | 1.489(9)  |
| N(1)-C(18)   | 1.491(9)  |
| N(1)-P(1)    | 1.678(7)  |
| C(16)-C(17)  | 1.518(11) |
| C(16)-H(16A) | 0.9900    |
| C(16)-H(16B) | 0.9900    |
| C(17)-H(17A) | 0.9800    |
| C(17)-H(17B) | 0.9800    |
| C(17)-H(17C) | 0.9800    |
| C(18)-C(19)  | 1.520(11) |
| C(18)-H(18A) | 0.9900    |
| C(18)-H(18B) | 0.9900    |
| C(19)-H(19A) | 0.9800    |
| C(19)-H(19B) | 0.9800    |
| C(19)-H(19C) | 0.9800    |
| N(2)-C(20)   | 1.475(9)  |
| N(2)-C(22)   | 1.484(9)  |
| N(2)-P(1)    | 1.662(7)  |
| C(20)-C(21)  | 1.521(10) |
| C(20)-H(20A) | 0.9900    |
| C(20)-H(20B) | 0.9900    |
| C(21)-H(21A) | 0.9800    |
| C(21)-H(21B) | 0.9800    |
| C(21)-H(21C) | 0.9800    |
| C(22)-C(23)  | 1.528(11) |
| C(22)-H(22A) | 0.9900    |
| C(22)-H(22B) | 0.9900    |
| C(23)-H(23A) | 0.9800    |
| C(23)-H(23B) | 0.9800    |
| C(23)-H(23C) | 0.9800    |
| N(3)-C(24)   | 1.487(9)  |
| N(3)-C(26)   | 1.490(9)  |
| N(3)-P(2)    | 1.671(7)  |
| C(24)-C(25)  | 1.522(11) |

|              |           |
|--------------|-----------|
| C(24)-H(24A) | 0.9900    |
| C(24)-H(24B) | 0.9900    |
| C(25)-H(25A) | 0.9800    |
| C(25)-H(25B) | 0.9800    |
| C(25)-H(25C) | 0.9800    |
| C(26)-C(27)  | 1.520(11) |
| C(26)-H(26A) | 0.9900    |
| C(26)-H(26B) | 0.9900    |
| C(27)-H(27A) | 0.9800    |
| C(27)-H(27B) | 0.9800    |
| C(27)-H(27C) | 0.9800    |
| N(4)-C(28)   | 1.493(8)  |
| N(4)-C(30)   | 1.497(9)  |
| N(4)-P(2)    | 1.671(7)  |
| C(28)-C(29)  | 1.523(11) |
| C(28)-H(28A) | 0.9900    |
| C(28)-H(28B) | 0.9900    |
| C(29)-H(29A) | 0.9800    |
| C(29)-H(29B) | 0.9800    |
| C(29)-H(29C) | 0.9800    |
| C(30)-C(31)  | 1.528(11) |
| C(30)-H(30A) | 0.9900    |
| C(30)-H(30B) | 0.9900    |
| C(31)-H(31A) | 0.9800    |
| C(31)-H(31B) | 0.9800    |
| C(31)-H(31C) | 0.9800    |
| N(5)-C(32)   | 1.130(16) |
| N(5)-Rh(1)   | 1.945(12) |
| C(32)-C(33)  | 1.45(2)   |
| C(33)-H(33A) | 0.9800    |
| C(33)-H(33B) | 0.9800    |
| C(33)-H(33C) | 0.9800    |
| O(1)-Rh(1)   | 2.129(8)  |
| P(1)-N(11)   | 1.661(7)  |
| P(1)-N(12)   | 1.675(8)  |
| P(1)-Rh(1)   | 2.254(4)  |

|              |           |
|--------------|-----------|
| P(2)-N(13)   | 1.658(7)  |
| P(2)-N(14)   | 1.663(7)  |
| P(2)-Rh(1)   | 2.243(4)  |
| C(34)-C(35)  | 1.360(14) |
| C(34)-O(2)   | 1.435(15) |
| C(34)-C(39)  | 1.434(15) |
| C(35)-C(36)  | 1.437(15) |
| C(35)-P(3)   | 1.825(14) |
| C(36)-C(37)  | 1.384(16) |
| C(36)-H(36A) | 0.9500    |
| C(37)-C(38)  | 1.369(16) |
| C(37)-H(37A) | 0.9500    |
| C(38)-C(39)  | 1.362(15) |
| C(38)-H(38A) | 0.9500    |
| C(39)-C(40)  | 1.495(15) |
| C(40)-C(48)  | 1.54(2)   |
| C(40)-C(41)  | 1.532(14) |
| C(40)-C(47)  | 1.554(19) |
| C(41)-C(42)  | 1.379(15) |
| C(41)-C(46)  | 1.378(14) |
| C(42)-C(43)  | 1.374(16) |
| C(42)-H(42A) | 0.9500    |
| C(43)-C(44)  | 1.401(15) |
| C(43)-H(43A) | 0.9500    |
| C(44)-C(45)  | 1.408(15) |
| C(44)-H(44A) | 0.9500    |
| C(45)-C(46)  | 1.386(15) |
| C(45)-P(4)   | 1.817(14) |
| C(46)-O(2)   | 1.389(15) |
| C(47)-H(47A) | 0.9800    |
| C(47)-H(47B) | 0.9800    |
| C(47)-H(47C) | 0.9800    |
| C(48)-H(48A) | 0.9800    |
| C(48)-H(48B) | 0.9800    |
| C(48)-H(48C) | 0.9800    |
| N(6)-C(49)   | 1.494(9)  |

|              |           |
|--------------|-----------|
| N(6)-C(51)   | 1.496(9)  |
| N(6)-P(3)    | 1.681(7)  |
| C(49)-C(50)  | 1.526(11) |
| C(49)-H(49A) | 0.9900    |
| C(49)-H(49B) | 0.9900    |
| C(50)-H(50A) | 0.9800    |
| C(50)-H(50B) | 0.9800    |
| C(50)-H(50C) | 0.9800    |
| C(51)-C(52)  | 1.530(11) |
| C(51)-H(51A) | 0.9900    |
| C(51)-H(51B) | 0.9900    |
| C(52)-H(52A) | 0.9800    |
| C(52)-H(52B) | 0.9800    |
| C(52)-H(52C) | 0.9800    |
| N(7)-C(55)   | 1.483(9)  |
| N(7)-C(53)   | 1.482(9)  |
| N(7)-P(3)    | 1.662(7)  |
| C(53)-C(54)  | 1.523(11) |
| C(53)-H(53A) | 0.9900    |
| C(53)-H(53B) | 0.9900    |
| C(54)-H(54A) | 0.9800    |
| C(54)-H(54B) | 0.9800    |
| C(54)-H(54C) | 0.9800    |
| C(55)-C(56)  | 1.527(11) |
| C(55)-H(55A) | 0.9900    |
| C(55)-H(55B) | 0.9900    |
| C(56)-H(56A) | 0.9800    |
| C(56)-H(56B) | 0.9800    |
| C(56)-H(56C) | 0.9800    |
| N(8)-C(57)   | 1.474(8)  |
| N(8)-C(59)   | 1.476(9)  |
| N(8)-P(4)    | 1.657(7)  |
| C(57)-C(58)  | 1.518(11) |
| C(57)-H(57A) | 0.9900    |
| C(57)-H(57B) | 0.9900    |
| C(58)-H(58A) | 0.9800    |

|              |           |
|--------------|-----------|
| C(58)-H(58B) | 0.9800    |
| C(58)-H(58C) | 0.9800    |
| C(59)-C(60)  | 1.530(11) |
| C(59)-H(59A) | 0.9900    |
| C(59)-H(59B) | 0.9900    |
| C(60)-H(60A) | 0.9800    |
| C(60)-H(60B) | 0.9800    |
| C(60)-H(60C) | 0.9800    |
| N(9)-C(61)   | 1.487(9)  |
| N(9)-C(63)   | 1.491(9)  |
| N(9)-P(4)    | 1.670(7)  |
| C(61)-C(62)  | 1.520(11) |
| C(61)-H(61A) | 0.9900    |
| C(61)-H(61B) | 0.9900    |
| C(62)-H(62A) | 0.9800    |
| C(62)-H(62B) | 0.9800    |
| C(62)-H(62C) | 0.9800    |
| C(63)-C(64)  | 1.528(11) |
| C(63)-H(63A) | 0.9900    |
| C(63)-H(63B) | 0.9900    |
| C(64)-H(64A) | 0.9800    |
| C(64)-H(64B) | 0.9800    |
| C(64)-H(64C) | 0.9800    |
| N(10)-C(65)  | 1.15(2)   |
| N(10)-Rh(2)  | 1.885(16) |
| C(65)-C(66)  | 1.45(2)   |
| C(66)-H(66A) | 0.9800    |
| C(66)-H(66B) | 0.9800    |
| C(66)-H(66C) | 0.9800    |
| O(2)-Rh(2)   | 2.135(11) |
| P(3)-N(16)   | 1.668(9)  |
| P(3)-N(15)   | 1.678(8)  |
| P(3)-Rh(2)   | 2.253(5)  |
| P(4)-N(18)   | 1.670(8)  |
| P(4)-N(17)   | 1.681(7)  |
| P(4)-Rh(2)   | 2.252(5)  |

|              |           |
|--------------|-----------|
| F(1)-B(1)    | 1.362(8)  |
| F(2)-B(1)    | 1.363(8)  |
| F(3)-B(1)    | 1.363(8)  |
| F(4)-B(1)    | 1.363(8)  |
| F(5)-B(2)    | 1.365(8)  |
| F(6)-B(2)    | 1.363(8)  |
| F(7)-B(2)    | 1.365(8)  |
| F(8)-B(2)    | 1.364(8)  |
| N(11)-C(67)  | 1.476(9)  |
| N(11)-C(69)  | 1.485(9)  |
| C(67)-C(68)  | 1.522(11) |
| C(67)-H(67A) | 0.9900    |
| C(67)-H(67B) | 0.9900    |
| C(68)-H(68A) | 0.9800    |
| C(68)-H(68B) | 0.9800    |
| C(68)-H(68C) | 0.9800    |
| C(69)-C(70)  | 1.527(11) |
| C(69)-H(69A) | 0.9900    |
| C(69)-H(69B) | 0.9900    |
| C(70)-H(70A) | 0.9800    |
| C(70)-H(70B) | 0.9800    |
| C(70)-H(70C) | 0.9800    |
| N(12)-C(71)  | 1.487(9)  |
| N(12)-C(73)  | 1.493(9)  |
| C(71)-C(72)  | 1.523(11) |
| C(71)-H(71A) | 0.9900    |
| C(71)-H(71B) | 0.9900    |
| C(72)-H(72A) | 0.9800    |
| C(72)-H(72B) | 0.9800    |
| C(72)-H(72C) | 0.9800    |
| C(73)-C(74)  | 1.526(11) |
| C(73)-H(73A) | 0.9900    |
| C(73)-H(73B) | 0.9900    |
| C(74)-H(74A) | 0.9800    |
| C(74)-H(74B) | 0.9800    |
| C(74)-H(74C) | 0.9800    |

|              |           |
|--------------|-----------|
| N(13)-C(75)  | 1.477(9)  |
| N(13)-C(77)  | 1.485(9)  |
| C(75)-C(76)  | 1.525(11) |
| C(75)-H(75A) | 0.9900    |
| C(75)-H(75B) | 0.9900    |
| C(76)-H(76A) | 0.9800    |
| C(76)-H(76B) | 0.9800    |
| C(76)-H(76C) | 0.9800    |
| C(77)-C(78)  | 1.517(11) |
| C(77)-H(77A) | 0.9900    |
| C(77)-H(77B) | 0.9900    |
| C(78)-H(78A) | 0.9800    |
| C(78)-H(78B) | 0.9800    |
| C(78)-H(78C) | 0.9800    |
| N(14)-C(79)  | 1.480(9)  |
| N(14)-C(81)  | 1.484(9)  |
| C(79)-C(80)  | 1.522(11) |
| C(79)-H(79A) | 0.9900    |
| C(79)-H(79B) | 0.9900    |
| C(80)-H(80A) | 0.9800    |
| C(80)-H(80B) | 0.9800    |
| C(80)-H(80C) | 0.9800    |
| C(81)-C(82)  | 1.528(11) |
| C(81)-H(81A) | 0.9900    |
| C(81)-H(81B) | 0.9900    |
| C(82)-H(82A) | 0.9800    |
| C(82)-H(82B) | 0.9800    |
| C(82)-H(82C) | 0.9800    |
| N(15)-C(83)  | 1.488(9)  |
| N(15)-C(85)  | 1.495(10) |
| C(83)-C(84)  | 1.518(11) |
| C(83)-H(83A) | 0.9900    |
| C(83)-H(83B) | 0.9900    |
| C(84)-H(84A) | 0.9800    |
| C(84)-H(84B) | 0.9800    |
| C(84)-H(84C) | 0.9800    |



|              |           |
|--------------|-----------|
| C(85)-C(86)  | 1.526(11) |
| C(85)-H(85A) | 0.9900    |
| C(85)-H(85B) | 0.9900    |
| C(86)-H(86A) | 0.9800    |
| C(86)-H(86B) | 0.9800    |
| C(86)-H(86C) | 0.9800    |
| N(16)-C(87)  | 1.43(4)   |
| N(16)-C(89)  | 1.59(4)   |
| C(87)-C(88)  | 1.48(3)   |
| C(87)-H(87A) | 0.9900    |
| C(87)-H(87B) | 0.9900    |
| C(88)-H(88A) | 0.9800    |
| C(88)-H(88B) | 0.9800    |
| C(88)-H(88C) | 0.9800    |
| C(89)-C(90)  | 1.49(3)   |
| C(89)-H(89A) | 0.9900    |
| C(89)-H(89B) | 0.9900    |
| C(90)-H(90A) | 0.9800    |
| C(90)-H(90B) | 0.9800    |
| C(90)-H(90C) | 0.9800    |
| N(17)-C(91)  | 1.492(9)  |
| N(17)-C(93)  | 1.496(9)  |
| C(91)-C(92)  | 1.522(11) |
| C(91)-H(91A) | 0.9900    |
| C(91)-H(91B) | 0.9900    |
| C(92)-H(92A) | 0.9800    |
| C(92)-H(92B) | 0.9800    |
| C(92)-H(92C) | 0.9800    |
| C(93)-C(94)  | 1.524(11) |
| C(93)-H(93A) | 0.9900    |
| C(93)-H(93B) | 0.9900    |
| C(94)-H(94A) | 0.9800    |
| C(94)-H(94B) | 0.9800    |
| C(94)-H(94C) | 0.9800    |
| N(18)-C(97)  | 1.487(9)  |
| N(18)-C(95)  | 1.487(9)  |

|                 |           |
|-----------------|-----------|
| C(95)-C(96)     | 1.526(11) |
| C(95)-H(95A)    | 0.9900    |
| C(95)-H(95B)    | 0.9900    |
| C(96)-H(96A)    | 0.9800    |
| C(96)-H(96B)    | 0.9800    |
| C(96)-H(96C)    | 0.9800    |
| C(97)-C(98)     | 1.525(11) |
| C(97)-H(97A)    | 0.9900    |
| C(97)-H(97B)    | 0.9900    |
| C(98)-H(98A)    | 0.9800    |
| C(98)-H(98B)    | 0.9800    |
| C(98)-H(98C)    | 0.9800    |
| F(9)-B(3)       | 1.362(8)  |
| F(10)-B(3)      | 1.363(8)  |
| F(11)-B(3)      | 1.364(8)  |
| F(12)-B(3)      | 1.363(8)  |
| F(13)-B(4)      | 1.364(8)  |
| F(14)-B(4)      | 1.363(8)  |
| F(15)-B(4)      | 1.363(8)  |
| F(16)-B(4)      | 1.364(8)  |
|                 |           |
| C(2)-C(1)-O(1)  | 117.3(10) |
| C(2)-C(1)-C(6)  | 121.3(10) |
| O(1)-C(1)-C(6)  | 121.4(10) |
| C(1)-C(2)-C(3)  | 119.0(10) |
| C(1)-C(2)-P(1)  | 120.2(9)  |
| C(3)-C(2)-P(1)  | 120.8(9)  |
| C(4)-C(3)-C(2)  | 119.4(11) |
| C(4)-C(3)-H(3A) | 120.3     |
| C(2)-C(3)-H(3A) | 120.3     |
| C(3)-C(4)-C(5)  | 119.6(12) |
| C(3)-C(4)-H(4A) | 120.2     |
| C(5)-C(4)-H(4A) | 120.2     |
| C(6)-C(5)-C(4)  | 123.3(11) |
| C(6)-C(5)-H(5A) | 118.3     |
| C(4)-C(5)-H(5A) | 118.4     |

|                     |           |
|---------------------|-----------|
| C(5)-C(6)-C(1)      | 117.4(10) |
| C(5)-C(6)-C(7)      | 121.2(11) |
| C(1)-C(6)-C(7)      | 121.4(10) |
| C(6)-C(7)-C(8)      | 113.6(9)  |
| C(6)-C(7)-C(14)     | 109.6(11) |
| C(8)-C(7)-C(14)     | 108.8(11) |
| C(6)-C(7)-C(15)     | 109.4(11) |
| C(8)-C(7)-C(15)     | 105.0(11) |
| C(14)-C(7)-C(15)    | 110.3(11) |
| C(13)-C(8)-C(9)     | 116.2(10) |
| C(13)-C(8)-C(7)     | 121.8(10) |
| C(9)-C(8)-C(7)      | 121.9(10) |
| C(10)-C(9)-C(8)     | 122.7(11) |
| C(10)-C(9)-H(9A)    | 118.6     |
| C(8)-C(9)-H(9A)     | 118.6     |
| C(9)-C(10)-C(11)    | 120.1(12) |
| C(9)-C(10)-H(10A)   | 120.0     |
| C(11)-C(10)-H(10A)  | 120.0     |
| C(12)-C(11)-C(10)   | 118.6(11) |
| C(12)-C(11)-H(11A)  | 120.7     |
| C(10)-C(11)-H(11A)  | 120.7     |
| C(11)-C(12)-C(13)   | 118.3(10) |
| C(11)-C(12)-P(2)    | 121.0(9)  |
| C(13)-C(12)-P(2)    | 120.6(9)  |
| C(8)-C(13)-C(12)    | 124.0(11) |
| C(8)-C(13)-O(1)     | 121.8(10) |
| C(12)-C(13)-O(1)    | 114.2(10) |
| C(7)-C(14)-H(14A)   | 109.5     |
| C(7)-C(14)-H(14B)   | 109.5     |
| H(14A)-C(14)-H(14B) | 109.5     |
| C(7)-C(14)-H(14C)   | 109.5     |
| H(14A)-C(14)-H(14C) | 109.5     |
| H(14B)-C(14)-H(14C) | 109.5     |
| C(7)-C(15)-H(15A)   | 109.5     |
| C(7)-C(15)-H(15B)   | 109.5     |
| H(15A)-C(15)-H(15B) | 109.5     |

|                     |          |
|---------------------|----------|
| C(7)-C(15)-H(15C)   | 109.5    |
| H(15A)-C(15)-H(15C) | 109.5    |
| H(15B)-C(15)-H(15C) | 109.5    |
| C(16)-N(1)-C(18)    | 115.1(7) |
| C(16)-N(1)-P(1)     | 117.4(8) |
| C(18)-N(1)-P(1)     | 117.7(7) |
| N(1)-C(16)-C(17)    | 112.0(8) |
| N(1)-C(16)-H(16A)   | 109.2    |
| C(17)-C(16)-H(16A)  | 109.2    |
| N(1)-C(16)-H(16B)   | 109.2    |
| C(17)-C(16)-H(16B)  | 109.2    |
| H(16A)-C(16)-H(16B) | 107.9    |
| N(1)-C(18)-C(19)    | 112.1(8) |
| N(1)-C(18)-H(18A)   | 109.2    |
| C(19)-C(18)-H(18A)  | 109.2    |
| N(1)-C(18)-H(18B)   | 109.2    |
| C(19)-C(18)-H(18B)  | 109.2    |
| H(18A)-C(18)-H(18B) | 107.9    |
| C(20)-N(2)-C(22)    | 117.1(7) |
| C(20)-N(2)-P(1)     | 122.4(7) |
| C(22)-N(2)-P(1)     | 118.7(7) |
| N(2)-C(20)-C(21)    | 112.4(8) |
| N(2)-C(20)-H(20A)   | 109.1    |
| C(21)-C(20)-H(20A)  | 109.1    |
| N(2)-C(20)-H(20B)   | 109.1    |
| C(21)-C(20)-H(20B)  | 109.1    |
| H(20A)-C(20)-H(20B) | 107.8    |
| N(2)-C(22)-C(23)    | 112.0(8) |
| N(2)-C(22)-H(22A)   | 109.2    |
| C(23)-C(22)-H(22A)  | 109.2    |
| N(2)-C(22)-H(22B)   | 109.2    |
| C(23)-C(22)-H(22B)  | 109.2    |
| H(22A)-C(22)-H(22B) | 107.9    |
| C(24)-N(3)-C(26)    | 115.0(8) |
| C(24)-N(3)-P(2)     | 118.6(8) |
| C(26)-N(3)-P(2)     | 118.9(9) |

|                     |           |
|---------------------|-----------|
| N(3)-C(24)-C(25)    | 111.9(9)  |
| N(3)-C(24)-H(24A)   | 109.2     |
| C(25)-C(24)-H(24A)  | 109.3     |
| N(3)-C(24)-H(24B)   | 109.2     |
| C(25)-C(24)-H(24B)  | 109.2     |
| H(24A)-C(24)-H(24B) | 107.9     |
| N(3)-C(26)-C(27)    | 112.1(9)  |
| N(3)-C(26)-H(26A)   | 109.2     |
| C(27)-C(26)-H(26A)  | 109.2     |
| N(3)-C(26)-H(26B)   | 109.2     |
| C(27)-C(26)-H(26B)  | 109.2     |
| H(26A)-C(26)-H(26B) | 107.9     |
| C(28)-N(4)-C(30)    | 113.9(7)  |
| C(28)-N(4)-P(2)     | 119.9(8)  |
| C(30)-N(4)-P(2)     | 116.4(8)  |
| N(4)-C(28)-C(29)    | 111.1(8)  |
| N(4)-C(28)-H(28A)   | 109.4     |
| C(29)-C(28)-H(28A)  | 109.4     |
| N(4)-C(28)-H(28B)   | 109.4     |
| C(29)-C(28)-H(28B)  | 109.4     |
| H(28A)-C(28)-H(28B) | 108.0     |
| N(4)-C(30)-C(31)    | 110.9(8)  |
| N(4)-C(30)-H(30A)   | 109.4     |
| C(31)-C(30)-H(30A)  | 109.4     |
| N(4)-C(30)-H(30B)   | 109.5     |
| C(31)-C(30)-H(30B)  | 109.5     |
| H(30A)-C(30)-H(30B) | 108.0     |
| C(32)-N(5)-Rh(1)    | 178.0(13) |
| N(5)-C(32)-C(33)    | 178.0(18) |
| C(32)-C(33)-H(33A)  | 109.5     |
| C(32)-C(33)-H(33B)  | 109.5     |
| H(33A)-C(33)-H(33B) | 109.5     |
| C(32)-C(33)-H(33C)  | 109.5     |
| H(33A)-C(33)-H(33C) | 109.5     |
| H(33B)-C(33)-H(33C) | 109.5     |
| C(1)-O(1)-C(13)     | 119.9(9)  |

|                   |            |
|-------------------|------------|
| C(1)-O(1)-Rh(1)   | 119.2(7)   |
| C(13)-O(1)-Rh(1)  | 120.8(7)   |
| N(11)-P(1)-N(12)  | 102.0(7)   |
| N(2)-P(1)-N(1)    | 102.8(5)   |
| N(11)-P(1)-C(2)   | 110.4(7)   |
| N(2)-P(1)-C(2)    | 110.7(6)   |
| N(12)-P(1)-C(2)   | 102.2(6)   |
| N(1)-P(1)-C(2)    | 103.0(6)   |
| N(11)-P(1)-Rh(1)  | 121.1(5)   |
| N(2)-P(1)-Rh(1)   | 120.0(4)   |
| N(12)-P(1)-Rh(1)  | 120.4(6)   |
| N(1)-P(1)-Rh(1)   | 119.9(5)   |
| C(2)-P(1)-Rh(1)   | 99.1(4)    |
| N(13)-P(2)-N(14)  | 104.3(7)   |
| N(3)-P(2)-N(4)    | 104.1(6)   |
| N(13)-P(2)-C(12)  | 105.0(7)   |
| N(14)-P(2)-C(12)  | 109.9(7)   |
| N(3)-P(2)-C(12)   | 108.9(6)   |
| N(4)-P(2)-C(12)   | 100.1(6)   |
| N(13)-P(2)-Rh(1)  | 120.4(4)   |
| N(14)-P(2)-Rh(1)  | 115.9(5)   |
| N(3)-P(2)-Rh(1)   | 117.3(6)   |
| N(4)-P(2)-Rh(1)   | 123.7(5)   |
| C(12)-P(2)-Rh(1)  | 100.5(4)   |
| N(5)-Rh(1)-O(1)   | 178.8(5)   |
| N(5)-Rh(1)-P(2)   | 95.1(4)    |
| O(1)-Rh(1)-P(2)   | 83.8(3)    |
| N(5)-Rh(1)-P(1)   | 96.8(4)    |
| O(1)-Rh(1)-P(1)   | 84.2(3)    |
| P(2)-Rh(1)-P(1)   | 168.00(15) |
| C(35)-C(34)-O(2)  | 118.7(11)  |
| C(35)-C(34)-C(39) | 121.1(11)  |
| O(2)-C(34)-C(39)  | 120.2(11)  |
| C(34)-C(35)-C(36) | 118.7(11)  |
| C(34)-C(35)-P(3)  | 118.9(10)  |
| C(36)-C(35)-P(3)  | 122.5(10)  |

|                    |           |
|--------------------|-----------|
| C(37)-C(36)-C(35)  | 119.9(12) |
| C(37)-C(36)-H(36A) | 120.1     |
| C(35)-C(36)-H(36A) | 120.1     |
| C(38)-C(37)-C(36)  | 119.4(13) |
| C(38)-C(37)-H(37A) | 120.3     |
| C(36)-C(37)-H(37A) | 120.3     |
| C(37)-C(38)-C(39)  | 122.9(12) |
| C(37)-C(38)-H(38A) | 118.6     |
| C(39)-C(38)-H(38A) | 118.5     |
| C(38)-C(39)-C(34)  | 117.7(11) |
| C(38)-C(39)-C(40)  | 120.9(12) |
| C(34)-C(39)-C(40)  | 121.3(11) |
| C(39)-C(40)-C(48)  | 111.4(14) |
| C(39)-C(40)-C(41)  | 112.9(10) |
| C(48)-C(40)-C(41)  | 108.7(13) |
| C(39)-C(40)-C(47)  | 109.9(13) |
| C(48)-C(40)-C(47)  | 106.2(12) |
| C(41)-C(40)-C(47)  | 107.5(13) |
| C(42)-C(41)-C(46)  | 116.5(11) |
| C(42)-C(41)-C(40)  | 122.1(11) |
| C(46)-C(41)-C(40)  | 121.3(11) |
| C(43)-C(42)-C(41)  | 122.5(12) |
| C(43)-C(42)-H(42A) | 118.8     |
| C(41)-C(42)-H(42A) | 118.8     |
| C(42)-C(43)-C(44)  | 120.0(13) |
| C(42)-C(43)-H(43A) | 120.0     |
| C(44)-C(43)-H(43A) | 120.0     |
| C(43)-C(44)-C(45)  | 119.1(12) |
| C(43)-C(44)-H(44A) | 120.5     |
| C(45)-C(44)-H(44A) | 120.4     |
| C(46)-C(45)-C(44)  | 117.7(11) |
| C(46)-C(45)-P(4)   | 122.1(11) |
| C(44)-C(45)-P(4)   | 120.2(10) |
| C(45)-C(46)-C(41)  | 124.2(11) |
| C(45)-C(46)-O(2)   | 112.9(12) |
| C(41)-C(46)-O(2)   | 122.9(12) |

|                     |          |
|---------------------|----------|
| C(40)-C(47)-H(47A)  | 109.5    |
| C(40)-C(47)-H(47B)  | 109.5    |
| H(47A)-C(47)-H(47B) | 109.5    |
| C(40)-C(47)-H(47C)  | 109.5    |
| H(47A)-C(47)-H(47C) | 109.5    |
| H(47B)-C(47)-H(47C) | 109.5    |
| C(40)-C(48)-H(48A)  | 109.5    |
| C(40)-C(48)-H(48B)  | 109.5    |
| H(48A)-C(48)-H(48B) | 109.5    |
| C(40)-C(48)-H(48C)  | 109.5    |
| H(48A)-C(48)-H(48C) | 109.5    |
| H(48B)-C(48)-H(48C) | 109.5    |
| C(49)-N(6)-C(51)    | 114.3(8) |
| C(49)-N(6)-P(3)     | 117.0(8) |
| C(51)-N(6)-P(3)     | 116.5(8) |
| N(6)-C(49)-C(50)    | 110.9(8) |
| N(6)-C(49)-H(49A)   | 109.5    |
| C(50)-C(49)-H(49A)  | 109.4    |
| N(6)-C(49)-H(49B)   | 109.5    |
| C(50)-C(49)-H(49B)  | 109.5    |
| H(49A)-C(49)-H(49B) | 108.0    |
| N(6)-C(51)-C(52)    | 111.4(9) |
| N(6)-C(51)-H(51A)   | 109.4    |
| C(52)-C(51)-H(51A)  | 109.4    |
| N(6)-C(51)-H(51B)   | 109.3    |
| C(52)-C(51)-H(51B)  | 109.4    |
| H(51A)-C(51)-H(51B) | 108.0    |
| C(55)-N(7)-C(53)    | 116.3(8) |
| C(55)-N(7)-P(3)     | 120.8(8) |
| C(53)-N(7)-P(3)     | 120.7(9) |
| N(7)-C(53)-C(54)    | 111.9(9) |
| N(7)-C(53)-H(53A)   | 109.2    |
| C(54)-C(53)-H(53A)  | 109.2    |
| N(7)-C(53)-H(53B)   | 109.2    |
| C(54)-C(53)-H(53B)  | 109.2    |
| H(53A)-C(53)-H(53B) | 107.9    |



|                     |          |
|---------------------|----------|
| N(7)-C(55)-C(56)    | 112.0(9) |
| N(7)-C(55)-H(55A)   | 109.2    |
| C(56)-C(55)-H(55A)  | 109.2    |
| N(7)-C(55)-H(55B)   | 109.2    |
| C(56)-C(55)-H(55B)  | 109.2    |
| H(55A)-C(55)-H(55B) | 107.9    |
| C(57)-N(8)-C(59)    | 117.6(7) |
| C(57)-N(8)-P(4)     | 120.3(8) |
| C(59)-N(8)-P(4)     | 122.0(8) |
| N(8)-C(57)-C(58)    | 112.9(9) |
| N(8)-C(57)-H(57A)   | 109.0    |
| C(58)-C(57)-H(57A)  | 109.0    |
| N(8)-C(57)-H(57B)   | 109.0    |
| C(58)-C(57)-H(57B)  | 109.0    |
| H(57A)-C(57)-H(57B) | 107.8    |
| N(8)-C(59)-C(60)    | 112.3(9) |
| N(8)-C(59)-H(59A)   | 109.2    |
| C(60)-C(59)-H(59A)  | 109.1    |
| N(8)-C(59)-H(59B)   | 109.2    |
| C(60)-C(59)-H(59B)  | 109.2    |
| H(59A)-C(59)-H(59B) | 107.9    |
| C(61)-N(9)-C(63)    | 115.3(8) |
| C(61)-N(9)-P(4)     | 118.7(8) |
| C(63)-N(9)-P(4)     | 117.8(8) |
| N(9)-C(61)-C(62)    | 111.9(8) |
| N(9)-C(61)-H(61A)   | 109.2    |
| C(62)-C(61)-H(61A)  | 109.2    |
| N(9)-C(61)-H(61B)   | 109.2    |
| C(62)-C(61)-H(61B)  | 109.3    |
| H(61A)-C(61)-H(61B) | 107.9    |
| N(9)-C(63)-C(64)    | 111.6(9) |
| N(9)-C(63)-H(63A)   | 109.3    |
| C(64)-C(63)-H(63A)  | 109.3    |
| N(9)-C(63)-H(63B)   | 109.3    |
| C(64)-C(63)-H(63B)  | 109.3    |
| H(63A)-C(63)-H(63B) | 108.0    |

|                     |           |
|---------------------|-----------|
| C(65)-N(10)-Rh(2)   | 178.7(16) |
| N(10)-C(65)-C(66)   | 176(2)    |
| C(65)-C(66)-H(66A)  | 109.5     |
| C(65)-C(66)-H(66B)  | 109.5     |
| H(66A)-C(66)-H(66B) | 109.5     |
| C(65)-C(66)-H(66C)  | 109.5     |
| H(66A)-C(66)-H(66C) | 109.5     |
| H(66B)-C(66)-H(66C) | 109.5     |
| C(46)-O(2)-C(34)    | 119.8(11) |
| C(46)-O(2)-Rh(2)    | 122.2(9)  |
| C(34)-O(2)-Rh(2)    | 117.4(9)  |
| N(16)-P(3)-N(15)    | 98.9(13)  |
| N(7)-P(3)-N(6)      | 103.1(7)  |
| N(7)-P(3)-C(35)     | 110.5(7)  |
| N(16)-P(3)-C(35)    | 105.9(13) |
| N(15)-P(3)-C(35)    | 111.1(8)  |
| N(6)-P(3)-C(35)     | 102.8(6)  |
| N(7)-P(3)-Rh(2)     | 114.8(5)  |
| N(16)-P(3)-Rh(2)    | 119.8(13) |
| N(15)-P(3)-Rh(2)    | 120.2(6)  |
| N(6)-P(3)-Rh(2)     | 124.2(5)  |
| C(35)-P(3)-Rh(2)    | 100.5(5)  |
| N(8)-P(4)-N(9)      | 103.6(6)  |
| N(18)-P(4)-N(17)    | 102.8(8)  |
| N(8)-P(4)-C(45)     | 108.6(8)  |
| N(9)-P(4)-C(45)     | 103.2(7)  |
| N(18)-P(4)-C(45)    | 112.4(9)  |
| N(17)-P(4)-C(45)    | 108.3(7)  |
| N(8)-P(4)-Rh(2)     | 118.0(4)  |
| N(9)-P(4)-Rh(2)     | 122.5(5)  |
| N(18)-P(4)-Rh(2)    | 116.2(6)  |
| N(17)-P(4)-Rh(2)    | 118.0(8)  |
| C(45)-P(4)-Rh(2)    | 99.2(5)   |
| N(10)-Rh(2)-O(2)    | 178.9(5)  |
| N(10)-Rh(2)-P(4)    | 96.2(5)   |
| O(2)-Rh(2)-P(4)     | 82.9(3)   |

|                     |            |
|---------------------|------------|
| N(10)-Rh(2)-P(3)    | 96.5(5)    |
| O(2)-Rh(2)-P(3)     | 84.4(3)    |
| P(4)-Rh(2)-P(3)     | 167.34(19) |
| F(1)-B(1)-F(3)      | 109.8(8)   |
| F(1)-B(1)-F(4)      | 108.5(9)   |
| F(3)-B(1)-F(4)      | 109.4(9)   |
| F(1)-B(1)-F(2)      | 108.1(8)   |
| F(3)-B(1)-F(2)      | 110.2(9)   |
| F(4)-B(1)-F(2)      | 110.8(9)   |
| F(6)-B(2)-F(8)      | 109.1(10)  |
| F(6)-B(2)-F(5)      | 109.8(10)  |
| F(8)-B(2)-F(5)      | 109.6(10)  |
| F(6)-B(2)-F(7)      | 108.8(10)  |
| F(8)-B(2)-F(7)      | 109.4(10)  |
| F(5)-B(2)-F(7)      | 110.1(10)  |
| C(67)-N(11)-C(69)   | 116.7(8)   |
| C(67)-N(11)-P(1)    | 121.4(8)   |
| C(69)-N(11)-P(1)    | 119.5(9)   |
| N(11)-C(67)-C(68)   | 112.4(9)   |
| N(11)-C(67)-H(67A)  | 109.1      |
| C(68)-C(67)-H(67A)  | 109.1      |
| N(11)-C(67)-H(67B)  | 109.1      |
| C(68)-C(67)-H(67B)  | 109.1      |
| H(67A)-C(67)-H(67B) | 107.9      |
| C(67)-C(68)-H(68A)  | 109.5      |
| C(67)-C(68)-H(68B)  | 109.5      |
| H(68A)-C(68)-H(68B) | 109.5      |
| C(67)-C(68)-H(68C)  | 109.5      |
| H(68A)-C(68)-H(68C) | 109.5      |
| H(68B)-C(68)-H(68C) | 109.5      |
| N(11)-C(69)-C(70)   | 111.6(9)   |
| N(11)-C(69)-H(69A)  | 109.3      |
| C(70)-C(69)-H(69A)  | 109.3      |
| N(11)-C(69)-H(69B)  | 109.3      |
| C(70)-C(69)-H(69B)  | 109.3      |
| H(69A)-C(69)-H(69B) | 108.0      |

|                     |           |
|---------------------|-----------|
| C(69)-C(70)-H(70A)  | 109.5     |
| C(69)-C(70)-H(70B)  | 109.5     |
| H(70A)-C(70)-H(70B) | 109.5     |
| C(69)-C(70)-H(70C)  | 109.5     |
| H(70A)-C(70)-H(70C) | 109.5     |
| H(70B)-C(70)-H(70C) | 109.5     |
| C(71)-N(12)-C(73)   | 115.0(8)  |
| C(71)-N(12)-P(1)    | 119.0(9)  |
| C(73)-N(12)-P(1)    | 118.6(10) |
| N(12)-C(71)-C(72)   | 111.9(9)  |
| N(12)-C(71)-H(71A)  | 109.3     |
| C(72)-C(71)-H(71A)  | 109.3     |
| N(12)-C(71)-H(71B)  | 109.2     |
| C(72)-C(71)-H(71B)  | 109.2     |
| H(71A)-C(71)-H(71B) | 107.9     |
| C(71)-C(72)-H(72A)  | 109.5     |
| C(71)-C(72)-H(72B)  | 109.5     |
| H(72A)-C(72)-H(72B) | 109.5     |
| C(71)-C(72)-H(72C)  | 109.5     |
| H(72A)-C(72)-H(72C) | 109.5     |
| H(72B)-C(72)-H(72C) | 109.5     |
| N(12)-C(73)-C(74)   | 111.5(9)  |
| N(12)-C(73)-H(73A)  | 109.3     |
| C(74)-C(73)-H(73A)  | 109.3     |
| N(12)-C(73)-H(73B)  | 109.3     |
| C(74)-C(73)-H(73B)  | 109.3     |
| H(73A)-C(73)-H(73B) | 108.0     |
| C(73)-C(74)-H(74A)  | 109.5     |
| C(73)-C(74)-H(74B)  | 109.5     |
| H(74A)-C(74)-H(74B) | 109.5     |
| C(73)-C(74)-H(74C)  | 109.5     |
| H(74A)-C(74)-H(74C) | 109.5     |
| H(74B)-C(74)-H(74C) | 109.5     |
| C(75)-N(13)-C(77)   | 116.4(8)  |
| C(75)-N(13)-P(2)    | 122.5(8)  |
| C(77)-N(13)-P(2)    | 118.9(8)  |

|                     |          |
|---------------------|----------|
| N(13)-C(75)-C(76)   | 112.1(9) |
| N(13)-C(75)-H(75A)  | 109.2    |
| C(76)-C(75)-H(75A)  | 109.2    |
| N(13)-C(75)-H(75B)  | 109.2    |
| C(76)-C(75)-H(75B)  | 109.2    |
| H(75A)-C(75)-H(75B) | 107.9    |
| C(75)-C(76)-H(76A)  | 109.5    |
| C(75)-C(76)-H(76B)  | 109.5    |
| H(76A)-C(76)-H(76B) | 109.5    |
| C(75)-C(76)-H(76C)  | 109.5    |
| H(76A)-C(76)-H(76C) | 109.5    |
| H(76B)-C(76)-H(76C) | 109.5    |
| N(13)-C(77)-C(78)   | 112.2(9) |
| N(13)-C(77)-H(77A)  | 109.2    |
| C(78)-C(77)-H(77A)  | 109.1    |
| N(13)-C(77)-H(77B)  | 109.2    |
| C(78)-C(77)-H(77B)  | 109.2    |
| H(77A)-C(77)-H(77B) | 107.9    |
| C(77)-C(78)-H(78A)  | 109.5    |
| C(77)-C(78)-H(78B)  | 109.4    |
| H(78A)-C(78)-H(78B) | 109.5    |
| C(77)-C(78)-H(78C)  | 109.5    |
| H(78A)-C(78)-H(78C) | 109.5    |
| H(78B)-C(78)-H(78C) | 109.5    |
| C(79)-N(14)-C(81)   | 116.5(8) |
| C(79)-N(14)-P(2)    | 120.9(8) |
| C(81)-N(14)-P(2)    | 120.1(9) |
| N(14)-C(79)-C(80)   | 112.3(9) |
| N(14)-C(79)-H(79A)  | 109.1    |
| C(80)-C(79)-H(79A)  | 109.2    |
| N(14)-C(79)-H(79B)  | 109.1    |
| C(80)-C(79)-H(79B)  | 109.2    |
| H(79A)-C(79)-H(79B) | 107.9    |
| C(79)-C(80)-H(80A)  | 109.5    |
| C(79)-C(80)-H(80B)  | 109.5    |
| H(80A)-C(80)-H(80B) | 109.5    |

|                     |           |
|---------------------|-----------|
| C(79)-C(80)-H(80C)  | 109.5     |
| H(80A)-C(80)-H(80C) | 109.5     |
| H(80B)-C(80)-H(80C) | 109.5     |
| N(14)-C(81)-C(82)   | 111.9(9)  |
| N(14)-C(81)-H(81A)  | 109.2     |
| C(82)-C(81)-H(81A)  | 109.2     |
| N(14)-C(81)-H(81B)  | 109.2     |
| C(82)-C(81)-H(81B)  | 109.3     |
| H(81A)-C(81)-H(81B) | 107.9     |
| C(81)-C(82)-H(82A)  | 109.5     |
| C(81)-C(82)-H(82B)  | 109.5     |
| H(82A)-C(82)-H(82B) | 109.5     |
| C(81)-C(82)-H(82C)  | 109.5     |
| H(82A)-C(82)-H(82C) | 109.5     |
| H(82B)-C(82)-H(82C) | 109.5     |
| C(83)-N(15)-C(85)   | 114.8(8)  |
| C(83)-N(15)-P(3)    | 117.3(8)  |
| C(85)-N(15)-P(3)    | 116.7(10) |
| N(15)-C(83)-C(84)   | 112.2(9)  |
| N(15)-C(83)-H(83A)  | 109.2     |
| C(84)-C(83)-H(83A)  | 109.2     |
| N(15)-C(83)-H(83B)  | 109.2     |
| C(84)-C(83)-H(83B)  | 109.2     |
| H(83A)-C(83)-H(83B) | 107.9     |
| C(83)-C(84)-H(84A)  | 109.5     |
| C(83)-C(84)-H(84B)  | 109.5     |
| H(84A)-C(84)-H(84B) | 109.5     |
| C(83)-C(84)-H(84C)  | 109.5     |
| H(84A)-C(84)-H(84C) | 109.5     |
| H(84B)-C(84)-H(84C) | 109.5     |
| N(15)-C(85)-C(86)   | 111.5(9)  |
| N(15)-C(85)-H(85A)  | 109.3     |
| C(86)-C(85)-H(85A)  | 109.3     |
| N(15)-C(85)-H(85B)  | 109.3     |
| C(86)-C(85)-H(85B)  | 109.4     |
| H(85A)-C(85)-H(85B) | 108.0     |

|                     |           |
|---------------------|-----------|
| C(85)-C(86)-H(86A)  | 109.4     |
| C(85)-C(86)-H(86B)  | 109.5     |
| H(86A)-C(86)-H(86B) | 109.5     |
| C(85)-C(86)-H(86C)  | 109.5     |
| H(86A)-C(86)-H(86C) | 109.5     |
| H(86B)-C(86)-H(86C) | 109.5     |
| C(87)-N(16)-C(89)   | 124(2)    |
| C(87)-N(16)-P(3)    | 123(3)    |
| C(89)-N(16)-P(3)    | 113(2)    |
| N(16)-C(87)-C(88)   | 105(3)    |
| N(16)-C(87)-H(87A)  | 110.7     |
| C(88)-C(87)-H(87A)  | 110.7     |
| N(16)-C(87)-H(87B)  | 110.7     |
| C(88)-C(87)-H(87B)  | 110.8     |
| H(87A)-C(87)-H(87B) | 108.8     |
| C(87)-C(88)-H(88A)  | 109.5     |
| C(87)-C(88)-H(88B)  | 109.5     |
| H(88A)-C(88)-H(88B) | 109.5     |
| C(87)-C(88)-H(88C)  | 109.5     |
| H(88A)-C(88)-H(88C) | 109.5     |
| H(88B)-C(88)-H(88C) | 109.5     |
| C(90)-C(89)-N(16)   | 110(3)    |
| C(90)-C(89)-H(89A)  | 109.8     |
| N(16)-C(89)-H(89A)  | 109.8     |
| C(90)-C(89)-H(89B)  | 109.7     |
| N(16)-C(89)-H(89B)  | 109.8     |
| H(89A)-C(89)-H(89B) | 108.2     |
| C(89)-C(90)-H(90A)  | 109.5     |
| C(89)-C(90)-H(90B)  | 109.5     |
| H(90A)-C(90)-H(90B) | 109.5     |
| C(89)-C(90)-H(90C)  | 109.5     |
| H(90A)-C(90)-H(90C) | 109.5     |
| H(90B)-C(90)-H(90C) | 109.5     |
| C(91)-N(17)-C(93)   | 114.4(8)  |
| C(91)-N(17)-P(4)    | 118.7(10) |
| C(93)-N(17)-P(4)    | 117.1(8)  |

|                     |          |
|---------------------|----------|
| N(17)-C(91)-C(92)   | 111.8(9) |
| N(17)-C(91)-H(91A)  | 109.3    |
| C(92)-C(91)-H(91A)  | 109.2    |
| N(17)-C(91)-H(91B)  | 109.3    |
| C(92)-C(91)-H(91B)  | 109.3    |
| H(91A)-C(91)-H(91B) | 107.9    |
| C(91)-C(92)-H(92A)  | 109.5    |
| C(91)-C(92)-H(92B)  | 109.4    |
| H(92A)-C(92)-H(92B) | 109.5    |
| C(91)-C(92)-H(92C)  | 109.5    |
| H(92A)-C(92)-H(92C) | 109.5    |
| H(92B)-C(92)-H(92C) | 109.5    |
| N(17)-C(93)-C(94)   | 111.9(9) |
| N(17)-C(93)-H(93A)  | 109.2    |
| C(94)-C(93)-H(93A)  | 109.3    |
| N(17)-C(93)-H(93B)  | 109.2    |
| C(94)-C(93)-H(93B)  | 109.2    |
| H(93A)-C(93)-H(93B) | 107.9    |
| C(93)-C(94)-H(94A)  | 109.5    |
| C(93)-C(94)-H(94B)  | 109.5    |
| H(94A)-C(94)-H(94B) | 109.5    |
| C(93)-C(94)-H(94C)  | 109.5    |
| H(94A)-C(94)-H(94C) | 109.5    |
| H(94B)-C(94)-H(94C) | 109.5    |
| C(97)-N(18)-C(95)   | 115.6(8) |
| C(97)-N(18)-P(4)    | 118.8(9) |
| C(95)-N(18)-P(4)    | 118.6(9) |
| N(18)-C(95)-C(96)   | 111.5(9) |
| N(18)-C(95)-H(95A)  | 109.4    |
| C(96)-C(95)-H(95A)  | 109.3    |
| N(18)-C(95)-H(95B)  | 109.3    |
| C(96)-C(95)-H(95B)  | 109.3    |
| H(95A)-C(95)-H(95B) | 108.0    |
| C(95)-C(96)-H(96A)  | 109.5    |
| C(95)-C(96)-H(96B)  | 109.5    |
| H(96A)-C(96)-H(96B) | 109.5    |



|                     |           |
|---------------------|-----------|
| C(95)-C(96)-H(96C)  | 109.4     |
| H(96A)-C(96)-H(96C) | 109.5     |
| H(96B)-C(96)-H(96C) | 109.5     |
| N(18)-C(97)-C(98)   | 112.1(9)  |
| N(18)-C(97)-H(97A)  | 109.2     |
| C(98)-C(97)-H(97A)  | 109.2     |
| N(18)-C(97)-H(97B)  | 109.2     |
| C(98)-C(97)-H(97B)  | 109.2     |
| H(97A)-C(97)-H(97B) | 107.9     |
| C(97)-C(98)-H(98A)  | 109.5     |
| C(97)-C(98)-H(98B)  | 109.5     |
| H(98A)-C(98)-H(98B) | 109.5     |
| C(97)-C(98)-H(98C)  | 109.5     |
| H(98A)-C(98)-H(98C) | 109.5     |
| H(98B)-C(98)-H(98C) | 109.5     |
| F(9)-B(3)-F(12)     | 108.5(10) |
| F(9)-B(3)-F(10)     | 107.8(10) |
| F(12)-B(3)-F(10)    | 110.8(10) |
| F(9)-B(3)-F(11)     | 109.9(10) |
| F(12)-B(3)-F(11)    | 109.3(11) |
| F(10)-B(3)-F(11)    | 110.5(10) |
| F(14)-B(4)-F(15)    | 110.8(11) |
| F(14)-B(4)-F(16)    | 110.7(11) |
| F(15)-B(4)-F(16)    | 109.4(11) |
| F(14)-B(4)-F(13)    | 107.8(10) |
| F(15)-B(4)-F(13)    | 109.6(10) |
| F(16)-B(4)-F(13)    | 108.5(10) |

Table SI-4. Anisotropic displacement parameters ( $\text{\AA}^2 \times 10^3$ ) for  $[(\mathbf{L1}')\text{Rh-NCMe}]\text{BF}_4$ .  
The anisotropic displacement factor exponent takes the form:  $-2\text{p}^2[ \text{h}^2 \text{a}^*2\text{U}^{11} + \dots + 2 \text{h k} \text{a}^* \text{b}^* \text{U}^{12} ]$

|      | $\text{U}^{11}$ | $\text{U}^{22}$ | $\text{U}^{33}$ | $\text{U}^{23}$ | $\text{U}^{13}$ | $\text{U}^{12}$ |
|------|-----------------|-----------------|-----------------|-----------------|-----------------|-----------------|
| C(1) | 29(9)           | 49(10)          | 56(11)          | 2(8)            | 13(8)           | -7(8)           |

|       |        |         |         |         |        |         |
|-------|--------|---------|---------|---------|--------|---------|
| C(2)  | 48(10) | 65(11)  | 47(11)  | -14(9)  | 20(9)  | -7(8)   |
| C(3)  | 60(11) | 117(16) | 50(11)  | -2(10)  | 25(9)  | -2(11)  |
| C(4)  | 37(10) | 80(13)  | 100(15) | -8(11)  | 17(10) | -23(9)  |
| C(5)  | 52(10) | 68(12)  | 52(11)  | -8(9)   | 22(9)  | -20(9)  |
| C(6)  | 54(11) | 58(11)  | 46(11)  | 2(9)    | 10(9)  | 6(9)    |
| C(7)  | 22(8)  | 59(12)  | 60(11)  | -1(9)   | 5(8)   | 5(8)    |
| C(8)  | 43(10) | 62(11)  | 54(11)  | -2(9)   | 8(9)   | 8(9)    |
| C(9)  | 77(12) | 63(12)  | 61(12)  | -1(10)  | 21(10) | 0(10)   |
| C(10) | 86(14) | 99(15)  | 69(13)  | -42(11) | 33(11) | -22(12) |
| C(11) | 82(13) | 85(14)  | 73(13)  | 3(11)   | 33(11) | -38(11) |
| C(12) | 76(11) | 55(11)  | 38(10)  | -10(8)  | 33(9)  | -5(9)   |
| C(13) | 54(11) | 52(11)  | 40(11)  | -11(8)  | 22(9)  | 5(9)    |
| C(14) | 70(12) | 62(13)  | 89(13)  | -12(10) | 37(10) | -16(10) |
| C(15) | 61(12) | 160(20) | 67(13)  | 13(13)  | 3(10)  | 37(13)  |
| N(1)  | 82(6)  | 75(5)   | 63(5)   | 10(5)   | 8(5)   | 3(5)    |
| C(16) | 88(6)  | 79(6)   | 71(6)   | 5(6)    | 3(6)   | 4(6)    |
| C(17) | 93(9)  | 83(9)   | 75(7)   | 0(8)    | -3(8)  | 0(8)    |
| C(18) | 94(7)  | 78(6)   | 70(7)   | 6(6)    | 8(6)   | 11(6)   |
| C(19) | 105(9) | 84(8)   | 78(9)   | 9(8)    | 13(8)  | 9(8)    |
| N(2)  | 73(6)  | 59(6)   | 103(6)  | -11(5)  | 25(5)  | -6(6)   |
| C(20) | 74(7)  | 64(7)   | 103(7)  | -10(6)  | 24(6)  | -8(6)   |
| C(21) | 79(8)  | 70(9)   | 98(8)   | -8(7)   | 27(8)  | -9(8)   |
| C(22) | 75(6)  | 61(6)   | 109(6)  | -6(5)   | 20(5)  | -3(6)   |
| C(23) | 76(7)  | 66(7)   | 117(8)  | -7(7)   | 15(7)  | 6(7)    |
| N(3)  | 69(5)  | 125(6)  | 85(6)   | -6(6)   | 34(5)  | 6(6)    |
| C(24) | 70(8)  | 137(9)  | 91(9)   | -7(9)   | 28(7)  | 6(8)    |
| C(25) | 74(8)  | 146(10) | 95(10)  | -4(10)  | 31(8)  | 2(9)    |
| C(26) | 75(6)  | 125(6)  | 90(6)   | -7(6)   | 30(6)  | 8(6)    |
| C(27) | 81(8)  | 121(8)  | 92(8)   | -6(7)   | 29(8)  | 7(9)    |
| N(4)  | 103(6) | 75(6)   | 109(6)  | 37(6)   | 11(6)  | -25(5)  |
| C(28) | 112(6) | 77(7)   | 114(7)  | 40(6)   | 4(6)   | -19(6)  |
| C(29) | 113(7) | 74(8)   | 118(8)  | 42(7)   | 2(7)   | -15(7)  |
| C(30) | 105(7) | 84(7)   | 111(7)  | 36(7)   | 12(7)  | -31(6)  |
| C(31) | 109(9) | 87(9)   | 112(9)  | 37(8)   | 16(8)  | -34(8)  |
| N(5)  | 28(8)  | 72(10)  | 63(9)   | 9(7)    | 1(7)   | 3(7)    |
| C(32) | 37(10) | 62(12)  | 54(11)  | 34(9)   | 16(9)  | 14(9)   |

|       |         |         |         |          |         |         |
|-------|---------|---------|---------|----------|---------|---------|
| C(33) | 30(10)  | 67(12)  | 141(17) | 14(12)   | -6(10)  | -13(9)  |
| O(1)  | 27(6)   | 58(7)   | 62(7)   | 5(6)     | 15(5)   | -10(5)  |
| P(1)  | 43(2)   | 64(3)   | 63(3)   | -10(3)   | 20(2)   | -10(2)  |
| P(2)  | 38(2)   | 66(3)   | 62(3)   | 4(2)     | 18(2)   | -2(2)   |
| Rh(1) | 37(1)   | 62(1)   | 61(1)   | -4(1)    | 15(1)   | -5(1)   |
| C(34) | 50(11)  | 92(15)  | 66(13)  | -30(12)  | 8(10)   | -3(11)  |
| C(35) | 76(12)  | 98(16)  | 80(14)  | -36(12)  | 38(11)  | -29(12) |
| C(36) | 120(16) | 170(20) | 121(17) | -101(16) | 81(14)  | -71(16) |
| C(37) | 170(20) | 62(16)  | 260(30) | -72(18)  | 110(20) | -32(16) |
| C(38) | 160(20) | 58(15)  | 190(20) | -32(15)  | 104(18) | -31(14) |
| C(39) | 61(12)  | 119(19) | 160(20) | -54(16)  | 74(13)  | -37(13) |
| C(40) | 44(12)  | 102(16) | 140(19) | -56(15)  | 5(12)   | 3(12)   |
| C(41) | 53(11)  | 89(16)  | 100(16) | -32(13)  | 27(11)  | -25(11) |
| C(42) | 105(16) | 88(17)  | 113(18) | -15(14)  | 41(14)  | 10(13)  |
| C(43) | 190(20) | 100(20) | 130(20) | 15(16)   | 72(18)  | -22(18) |
| C(44) | 129(17) | 77(16)  | 140(20) | -57(14)  | 62(15)  | -26(13) |
| C(45) | 86(13)  | 88(15)  | 87(14)  | -24(12)  | 55(11)  | -31(12) |
| C(46) | 42(10)  | 83(15)  | 76(14)  | -9(12)   | 7(10)   | -29(10) |
| C(47) | 51(11)  | 79(14)  | 131(17) | -18(12)  | -19(11) | -19(10) |
| C(48) | 63(13)  | 122(18) | 170(20) | -34(16)  | 7(14)   | 13(13)  |
| N(6)  | 139(6)  | 168(6)  | 93(6)   | -31(6)   | 30(6)   | 34(6)   |
| C(49) | 137(7)  | 176(7)  | 104(7)  | -36(7)   | 31(6)   | 34(6)   |
| C(50) | 138(7)  | 183(9)  | 116(9)  | -38(9)   | 30(8)   | 31(8)   |
| C(51) | 144(7)  | 169(6)  | 99(6)   | -29(7)   | 31(6)   | 39(6)   |
| C(52) | 149(8)  | 167(8)  | 99(7)   | -26(7)   | 33(7)   | 41(8)   |
| N(7)  | 91(6)   | 106(6)  | 138(6)  | -25(6)   | 68(5)   | -18(6)  |
| C(53) | 92(8)   | 108(8)  | 141(7)  | -24(7)   | 64(7)   | -19(7)  |
| C(54) | 93(11)  | 107(9)  | 144(12) | -25(10)  | 66(11)  | -18(10) |
| C(55) | 98(7)   | 112(7)  | 142(7)  | -24(7)   | 70(6)   | -16(6)  |
| C(56) | 99(10)  | 117(11) | 149(12) | -32(10)  | 71(10)  | -12(8)  |
| N(8)  | 77(6)   | 84(6)   | 137(6)  | 0(5)     | 50(5)   | 1(5)    |
| C(57) | 81(6)   | 87(6)   | 140(6)  | 0(6)     | 45(5)   | -2(6)   |
| C(58) | 81(8)   | 95(8)   | 146(8)  | -3(8)    | 42(7)   | -7(8)   |
| C(59) | 88(7)   | 90(7)   | 141(7)  | 1(7)     | 53(6)   | 6(7)    |
| C(60) | 95(9)   | 93(9)   | 147(9)  | -1(8)    | 52(8)   | 7(8)    |
| N(9)  | 99(5)   | 104(6)  | 84(6)   | -41(5)   | 17(5)   | 6(6)    |

|       |         |         |         |         |        |        |
|-------|---------|---------|---------|---------|--------|--------|
| C(61) | 101(6)  | 108(6)  | 93(7)   | -43(6)  | 12(6)  | 6(6)   |
| C(62) | 99(6)   | 109(8)  | 90(8)   | -41(7)  | 13(7)  | 9(7)   |
| C(63) | 104(7)  | 104(6)  | 87(7)   | -43(7)  | 20(7)  | 7(7)   |
| C(64) | 109(9)  | 105(8)  | 88(8)   | -43(7)  | 16(9)  | 6(9)   |
| N(10) | 68(10)  | 94(13)  | 60(10)  | -8(10)  | 12(8)  | -5(10) |
| C(65) | 44(11)  | 84(16)  | 83(14)  | 14(13)  | 19(9)  | 15(12) |
| C(66) | 108(16) | 83(17)  | 133(19) | -8(14)  | 12(14) | 7(14)  |
| O(2)  | 59(7)   | 71(8)   | 75(8)   | -20(7)  | 16(6)  | 7(7)   |
| P(3)  | 65(3)   | 100(4)  | 68(3)   | -21(3)  | 15(3)  | 7(3)   |
| P(4)  | 69(3)   | 75(4)   | 67(3)   | -16(3)  | 26(3)  | -14(3) |
| Rh(2) | 58(1)   | 77(1)   | 66(1)   | -13(1)  | 20(1)  | -3(1)  |
| F(1)  | 127(7)  | 168(8)  | 135(6)  | -21(7)  | 53(6)  | 16(7)  |
| F(2)  | 167(10) | 141(13) | 130(7)  | -20(9)  | 25(8)  | -2(10) |
| F(3)  | 110(7)  | 191(11) | 171(11) | -12(10) | 43(7)  | 10(8)  |
| F(4)  | 153(10) | 155(8)  | 131(9)  | -19(7)  | 55(9)  | 14(8)  |
| B(1)  | 122(7)  | 165(8)  | 134(7)  | -20(7)  | 47(7)  | 9(7)   |
| F(5)  | 115(7)  | 326(11) | 114(10) | 68(10)  | 33(7)  | 17(9)  |
| F(6)  | 120(8)  | 335(9)  | 136(8)  | 48(8)   | 48(7)  | 20(9)  |
| F(7)  | 144(8)  | 324(7)  | 152(8)  | 47(7)   | 12(7)  | 25(7)  |
| F(8)  | 130(9)  | 334(12) | 152(9)  | 37(10)  | -2(9)  | 31(11) |
| B(2)  | 121(8)  | 326(9)  | 128(8)  | 58(9)   | 27(7)  | 21(9)  |
| N(11) | 83(6)   | 76(6)   | 64(6)   | 8(6)    | 7(6)   | 3(6)   |
| C(67) | 85(7)   | 77(7)   | 65(7)   | 6(7)    | 6(6)   | 1(7)   |
| C(68) | 88(9)   | 79(9)   | 69(7)   | -1(9)   | 3(8)   | -1(9)  |
| C(69) | 91(6)   | 80(6)   | 68(6)   | 7(6)    | 8(6)   | 8(6)   |
| C(70) | 101(8)  | 82(7)   | 71(8)   | 6(8)    | 10(8)  | 9(7)   |
| N(12) | 72(6)   | 61(6)   | 106(6)  | -9(5)   | 22(5)  | -4(5)  |
| C(71) | 75(6)   | 62(7)   | 104(7)  | -9(6)   | 22(6)  | -4(6)  |
| C(72) | 78(9)   | 66(9)   | 100(9)  | -8(8)   | 25(8)  | -6(9)  |
| C(73) | 73(7)   | 65(7)   | 113(8)  | -9(7)   | 19(7)  | 3(7)   |
| C(74) | 75(8)   | 64(7)   | 113(8)  | -9(7)   | 16(7)  | 4(7)   |
| N(13) | 68(6)   | 122(7)  | 84(6)   | -6(6)   | 35(5)  | 5(6)   |
| C(75) | 69(7)   | 132(8)  | 86(6)   | -3(7)   | 39(6)  | 6(7)   |
| C(76) | 77(8)   | 146(10) | 95(9)   | -4(9)   | 37(7)  | 2(9)   |
| C(77) | 73(6)   | 126(7)  | 86(6)   | -2(6)   | 33(6)  | 5(7)   |
| C(78) | 82(9)   | 135(12) | 98(11)  | 0(11)   | 25(9)  | -1(11) |

|       |         |         |         |         |        |         |
|-------|---------|---------|---------|---------|--------|---------|
| N(14) | 106(6)  | 77(6)   | 111(6)  | 37(6)   | 12(6)  | -24(6)  |
| C(79) | 113(7)  | 75(7)   | 115(7)  | 39(7)   | 4(7)   | -17(6)  |
| C(80) | 113(7)  | 75(8)   | 117(8)  | 40(8)   | 3(8)   | -15(7)  |
| C(81) | 108(7)  | 79(8)   | 110(7)  | 38(7)   | 12(7)  | -30(7)  |
| C(82) | 111(8)  | 82(10)  | 111(9)  | 37(9)   | 14(8)  | -35(9)  |
| N(15) | 141(6)  | 168(7)  | 96(6)   | -29(6)  | 31(6)  | 35(6)   |
| C(83) | 139(6)  | 175(7)  | 102(6)  | -34(7)  | 32(6)  | 34(6)   |
| C(84) | 138(9)  | 177(9)  | 102(8)  | -35(9)  | 32(8)  | 34(9)   |
| C(85) | 145(7)  | 167(7)  | 100(7)  | -27(7)  | 33(7)  | 37(7)   |
| C(86) | 149(9)  | 168(10) | 101(9)  | -25(9)  | 36(8)  | 37(9)   |
| N(16) | 91(7)   | 105(7)  | 137(7)  | -27(7)  | 69(6)  | -16(7)  |
| C(87) | 93(7)   | 109(7)  | 140(7)  | -22(7)  | 65(6)  | -17(7)  |
| C(88) | 99(11)  | 113(11) | 143(12) | -14(11) | 61(10) | -19(10) |
| C(89) | 106(10) | 117(10) | 141(8)  | -19(10) | 75(8)  | -7(9)   |
| C(90) | 111(13) | 119(13) | 142(12) | -16(12) | 78(11) | -6(11)  |
| N(17) | 79(6)   | 86(6)   | 137(6)  | 0(6)    | 51(5)  | 0(5)    |
| C(91) | 82(6)   | 91(6)   | 142(7)  | 2(6)    | 46(6)  | -5(6)   |
| C(92) | 90(11)  | 99(11)  | 152(11) | 4(10)   | 42(11) | -16(9)  |
| C(93) | 83(6)   | 87(6)   | 138(7)  | 2(7)    | 48(6)  | -1(6)   |
| C(94) | 90(9)   | 91(9)   | 144(9)  | 2(9)    | 49(8)  | 5(8)    |
| N(18) | 99(6)   | 105(7)  | 84(6)   | -42(6)  | 17(6)  | 6(6)    |
| C(95) | 99(6)   | 109(6)  | 88(6)   | -44(6)  | 17(6)  | 6(6)    |
| C(96) | 99(7)   | 109(8)  | 95(8)   | -45(7)  | 12(7)  | 7(8)    |
| C(97) | 100(7)  | 104(7)  | 85(7)   | -41(7)  | 18(6)  | 5(8)    |
| C(98) | 104(10) | 103(9)  | 87(9)   | -41(8)  | 19(9)  | 6(9)    |
| F(9)  | 131(7)  | 167(8)  | 133(8)  | -16(7)  | 54(7)  | 11(7)   |
| F(10) | 159(12) | 136(15) | 136(9)  | -20(10) | 28(10) | 5(10)   |
| F(11) | 115(8)  | 178(10) | 150(9)  | -26(8)  | 46(8)  | 13(8)   |
| F(12) | 142(12) | 182(11) | 138(9)  | -35(9)  | 43(10) | 7(9)    |
| B(3)  | 124(8)  | 164(9)  | 131(9)  | -20(7)  | 47(8)  | 13(8)   |
| F(13) | 121(8)  | 329(10) | 123(9)  | 63(9)   | 30(7)  | 14(8)   |
| F(14) | 123(11) | 340(10) | 139(12) | 50(10)  | 50(10) | 18(10)  |
| F(15) | 142(12) | 324(11) | 146(10) | 43(10)  | 17(9)  | 40(11)  |
| F(16) | 136(9)  | 331(10) | 159(9)  | 46(9)   | 3(8)   | 29(9)   |
| B(4)  | 127(8)  | 327(8)  | 137(8)  | 52(8)   | 29(7)  | 24(7)   |

Table SI-5. Hydrogen coordinates ( $\times 10^4$ ) and isotropic displacement parameters ( $\text{\AA}^2 \times 10^3$ ) for  $[(\mathbf{L1}')\text{Rh-NCMe}]\text{BF}_4$ .

|        | x    | y    | z    | U(eq) |
|--------|------|------|------|-------|
| H(3A)  | 5971 | 4219 | 1011 | 88    |
| H(4A)  | 7028 | 4839 | 1489 | 87    |
| H(5A)  | 7192 | 5171 | 2421 | 67    |
| H(9A)  | 6217 | 5173 | 4182 | 79    |
| H(10A) | 5316 | 4803 | 4594 | 99    |
| H(11A) | 4271 | 4201 | 4048 | 93    |
| H(14A) | 6072 | 6123 | 2980 | 106   |
| H(14B) | 6912 | 6015 | 3047 | 106   |
| H(14C) | 6595 | 6010 | 3591 | 106   |
| H(15A) | 7050 | 3970 | 3409 | 149   |
| H(15B) | 7116 | 4609 | 3899 | 149   |
| H(15C) | 7513 | 4751 | 3406 | 149   |
| H(16A) | 3280 | 4095 | 537  | 99    |
| H(16B) | 3685 | 3340 | 377  | 99    |
| H(17A) | 3499 | 3823 | -469 | 132   |
| H(17B) | 4069 | 4495 | -218 | 132   |
| H(17C) | 3236 | 4646 | -274 | 132   |
| H(18A) | 4352 | 5312 | 497  | 99    |
| H(18B) | 4938 | 5178 | 1077 | 99    |
| H(19A) | 4093 | 5904 | 1343 | 136   |
| H(19B) | 3906 | 5029 | 1503 | 136   |
| H(19C) | 3450 | 5433 | 939  | 136   |
| H(20A) | 5770 | 2672 | 746  | 96    |
| H(20B) | 5208 | 3302 | 411  | 96    |
| H(21A) | 5173 | 2214 | -170 | 122   |
| H(21B) | 4433 | 2234 | 13   | 122   |
| H(21C) | 5048 | 1633 | 310  | 122   |
| H(22A) | 4836 | 1585 | 1083 | 99    |
| H(22B) | 4430 | 2014 | 1496 | 99    |
| H(23A) | 5538 | 1367 | 1974 | 132   |
| H(23B) | 5491 | 2270 | 2149 | 132   |

|        |      |       |      |     |
|--------|------|-------|------|-----|
| H(23C) | 5954 | 2030  | 1716 | 132 |
| H(24A) | 2445 | 3337  | 2460 | 117 |
| H(24B) | 2257 | 4192  | 2190 | 117 |
| H(25A) | 1957 | 3681  | 3220 | 155 |
| H(25B) | 1369 | 3815  | 2641 | 155 |
| H(25C) | 1792 | 4551  | 2971 | 155 |
| H(26A) | 3654 | 5209  | 3144 | 114 |
| H(26B) | 2815 | 5280  | 3100 | 114 |
| H(27A) | 3352 | 5932  | 2369 | 145 |
| H(27B) | 2560 | 5578  | 2189 | 145 |
| H(27C) | 3218 | 5084  | 2079 | 145 |
| H(28A) | 4364 | 2262  | 3954 | 126 |
| H(28B) | 4839 | 2829  | 3670 | 126 |
| H(29A) | 5054 | 1551  | 3420 | 159 |
| H(29B) | 4588 | 1961  | 2862 | 159 |
| H(29C) | 4217 | 1371  | 3212 | 159 |
| H(30A) | 3230 | 1978  | 2825 | 123 |
| H(30B) | 2718 | 2695  | 2894 | 123 |
| H(31A) | 3127 | 2256  | 3933 | 157 |
| H(31B) | 3161 | 1427  | 3632 | 157 |
| H(31C) | 2424 | 1901  | 3519 | 157 |
| H(33A) | 2309 | 1697  | 1130 | 126 |
| H(33B) | 1997 | 2467  | 780  | 126 |
| H(33C) | 1813 | 2291  | 1370 | 126 |
| H(36A) | 9727 | 1337  | 2946 | 155 |
| H(37A) | 9788 | -38   | 2975 | 186 |
| H(38A) | 9449 | -709  | 3684 | 150 |
| H(42A) | 8490 | -628  | 5432 | 120 |
| H(43A) | 8257 | 135   | 6145 | 161 |
| H(44A) | 8221 | 1517  | 6062 | 133 |
| H(47A) | 8164 | -1029 | 3874 | 141 |
| H(47B) | 7736 | -260  | 3980 | 141 |
| H(47C) | 7898 | -947  | 4441 | 141 |
| H(48A) | 9780 | -694  | 4904 | 184 |
| H(48B) | 9386 | -1271 | 4408 | 184 |
| H(48C) | 9121 | -1220 | 4976 | 184 |

|        |       |      |      |     |
|--------|-------|------|------|-----|
| H(49A) | 8291  | 1707 | 2839 | 166 |
| H(49B) | 8058  | 2319 | 2329 | 166 |
| H(50A) | 7369  | 2054 | 3150 | 219 |
| H(50B) | 7133  | 2661 | 2638 | 219 |
| H(50C) | 7650  | 2944 | 3220 | 219 |
| H(51A) | 9087  | 3932 | 3111 | 164 |
| H(51B) | 8239  | 3803 | 2933 | 164 |
| H(52A) | 8705  | 4356 | 2186 | 207 |
| H(52B) | 8261  | 3564 | 2002 | 207 |
| H(52C) | 9115  | 3543 | 2162 | 207 |
| H(53A) | 10911 | 3116 | 4366 | 129 |
| H(53B) | 10163 | 3326 | 4503 | 129 |
| H(54A) | 10829 | 4485 | 4434 | 163 |
| H(54B) | 10082 | 4490 | 3972 | 163 |
| H(54C) | 10801 | 4272 | 3793 | 163 |
| H(55A) | 10725 | 3144 | 3191 | 132 |
| H(55B) | 10181 | 2434 | 2977 | 132 |
| H(56A) | 11439 | 2064 | 3380 | 172 |
| H(56B) | 10856 | 1569 | 3600 | 172 |
| H(56C) | 11291 | 2260 | 3980 | 172 |
| H(57A) | 7427  | 3422 | 4401 | 119 |
| H(57B) | 6787  | 3571 | 4698 | 119 |
| H(58A) | 6277  | 2732 | 4011 | 157 |
| H(58B) | 6542  | 2136 | 4526 | 157 |
| H(58C) | 6997  | 2238 | 4065 | 157 |
| H(59A) | 7614  | 2636 | 5976 | 123 |
| H(59B) | 6861  | 2431 | 5555 | 123 |
| H(60A) | 6996  | 3642 | 6192 | 162 |
| H(60B) | 6443  | 3649 | 5588 | 162 |
| H(60C) | 7213  | 4045 | 5668 | 162 |
| H(61A) | 9422  | 1953 | 6104 | 123 |
| H(61B) | 9613  | 2664 | 6544 | 123 |
| H(62A) | 10583 | 2480 | 6154 | 151 |
| H(62B) | 10221 | 3300 | 5920 | 151 |
| H(62C) | 10081 | 2533 | 5530 | 151 |
| H(63A) | 8418  | 4053 | 5701 | 119 |



|        |      |      |      |     |
|--------|------|------|------|-----|
| H(63B) | 9268 | 4057 | 5791 | 119 |
| H(64A) | 8597 | 4408 | 6582 | 153 |
| H(64B) | 9437 | 4247 | 6697 | 153 |
| H(64C) | 8906 | 3545 | 6754 | 153 |
| H(66A) | 8587 | 5602 | 4616 | 167 |
| H(66B) | 8702 | 5539 | 3993 | 167 |
| H(66C) | 9378 | 5545 | 4523 | 167 |
| H(67A) | 5037 | 3682 | 327  | 94  |
| H(67B) | 4900 | 4611 | 280  | 94  |
| H(68A) | 4343 | 3625 | -524 | 123 |
| H(68B) | 4030 | 4488 | -480 | 123 |
| H(68C) | 3693 | 3747 | -234 | 123 |
| H(69A) | 3528 | 4533 | 1066 | 98  |
| H(69B) | 3342 | 4537 | 393  | 98  |
| H(70A) | 3588 | 5834 | 736  | 130 |
| H(70B) | 4179 | 5570 | 415  | 130 |
| H(70C) | 4364 | 5567 | 1088 | 130 |
| H(71A) | 4102 | 2542 | 529  | 96  |
| H(71B) | 4328 | 1861 | 990  | 96  |
| H(72A) | 4506 | 1668 | 7    | 121 |
| H(72B) | 5066 | 1296 | 535  | 121 |
| H(72C) | 5245 | 2108 | 270  | 121 |
| H(73A) | 5826 | 2715 | 1839 | 102 |
| H(73B) | 6057 | 2406 | 1292 | 102 |
| H(74A) | 5894 | 1376 | 1948 | 128 |
| H(74B) | 5485 | 1223 | 1306 | 128 |
| H(74C) | 5055 | 1544 | 1741 | 128 |
| H(75A) | 3012 | 4903 | 3567 | 111 |
| H(75B) | 3236 | 4016 | 3750 | 111 |
| H(76A) | 2055 | 4121 | 3771 | 155 |
| H(76B) | 2048 | 3619 | 3218 | 155 |
| H(76C) | 1844 | 4534 | 3167 | 155 |
| H(77A) | 3111 | 4716 | 2156 | 111 |
| H(77B) | 2959 | 5333 | 2606 | 111 |
| H(78A) | 1890 | 5106 | 1939 | 157 |
| H(78B) | 1816 | 4735 | 2522 | 157 |

|        |       |      |      |     |
|--------|-------|------|------|-----|
| H(78C) | 1968  | 4176 | 2039 | 157 |
| H(79A) | 3816  | 1965 | 2624 | 126 |
| H(79B) | 3844  | 1631 | 3239 | 126 |
| H(80A) | 4992  | 1607 | 3039 | 159 |
| H(80B) | 4998  | 2135 | 3581 | 159 |
| H(80C) | 4970  | 2546 | 2989 | 159 |
| H(81A) | 3448  | 3364 | 3843 | 122 |
| H(81B) | 3777  | 2503 | 3991 | 122 |
| H(82A) | 2505  | 2594 | 3942 | 155 |
| H(82B) | 2705  | 1908 | 3560 | 155 |
| H(82C) | 2377  | 2719 | 3278 | 155 |
| H(83A) | 7742  | 3060 | 2959 | 166 |
| H(83B) | 7973  | 2153 | 2990 | 166 |
| H(84A) | 8004  | 3076 | 2027 | 208 |
| H(84B) | 7296  | 2616 | 2068 | 208 |
| H(84C) | 8008  | 2136 | 2066 | 208 |
| H(85A) | 9169  | 4021 | 3261 | 165 |
| H(85B) | 8521  | 4002 | 2709 | 165 |
| H(86A) | 9246  | 3889 | 2147 | 208 |
| H(86B) | 9742  | 3260 | 2548 | 208 |
| H(86C) | 9855  | 4181 | 2675 | 208 |
| H(87A) | 10340 | 3253 | 4455 | 129 |
| H(87B) | 10868 | 3556 | 4083 | 129 |
| H(88A) | 11393 | 2519 | 4687 | 169 |
| H(88B) | 11294 | 2282 | 4040 | 169 |
| H(88C) | 10747 | 1957 | 4383 | 169 |
| H(89A) | 10468 | 2361 | 2995 | 136 |
| H(89B) | 9772  | 2893 | 2759 | 136 |
| H(90A) | 11103 | 3353 | 2863 | 174 |
| H(90B) | 10863 | 3793 | 3364 | 174 |
| H(90C) | 10419 | 3918 | 2727 | 174 |
| H(91A) | 7142  | 2049 | 4576 | 123 |
| H(91B) | 6568  | 2693 | 4654 | 123 |
| H(92A) | 6305  | 1518 | 5051 | 167 |
| H(92B) | 6588  | 2127 | 5555 | 167 |
| H(92C) | 7106  | 1452 | 5430 | 167 |

|        |       |      |      |     |
|--------|-------|------|------|-----|
| H(93A) | 7250  | 3881 | 4691 | 119 |
| H(93B) | 7837  | 4054 | 5264 | 119 |
| H(94A) | 6484  | 4355 | 5135 | 157 |
| H(94B) | 7023  | 4237 | 5740 | 157 |
| H(94C) | 6545  | 3516 | 5440 | 157 |
| H(95A) | 9812  | 3696 | 5984 | 120 |
| H(95B) | 9801  | 3018 | 5527 | 120 |
| H(96A) | 10506 | 2794 | 6524 | 155 |
| H(96B) | 10074 | 2069 | 6184 | 155 |
| H(96C) | 9747  | 2547 | 6625 | 155 |
| H(97A) | 8873  | 2750 | 6571 | 116 |
| H(97B) | 8086  | 2903 | 6186 | 116 |
| H(98A) | 8603  | 3889 | 6934 | 148 |
| H(98B) | 8157  | 4213 | 6338 | 148 |
| H(98C) | 9012  | 4215 | 6486 | 148 |

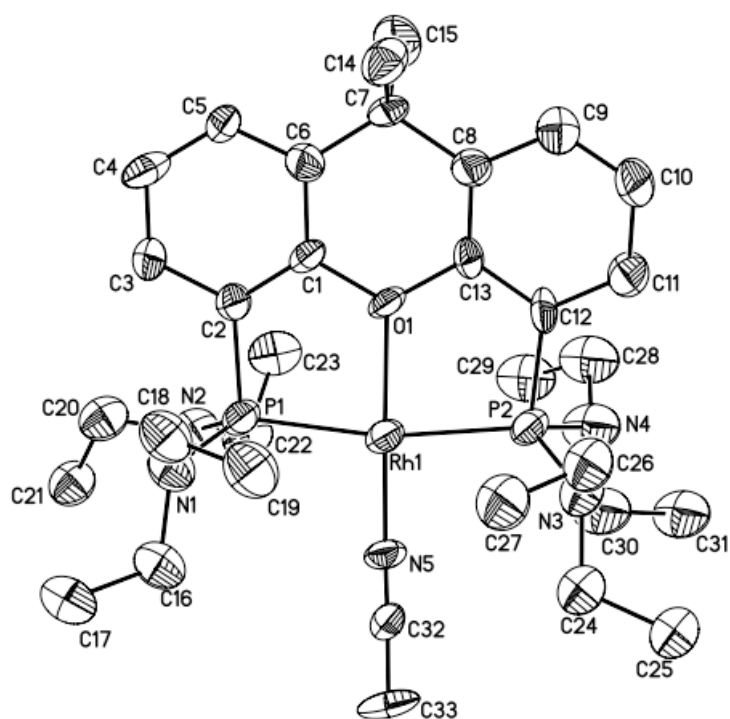

**Figure SI-4.** ORTEP diagram of  $[(L1')\text{Rh-NCMe}]\text{BF}_4$  (35% ellipsoids, hydrogens and  $\text{BF}_4$  counterion omitted for clarity)

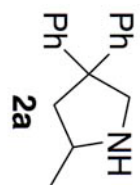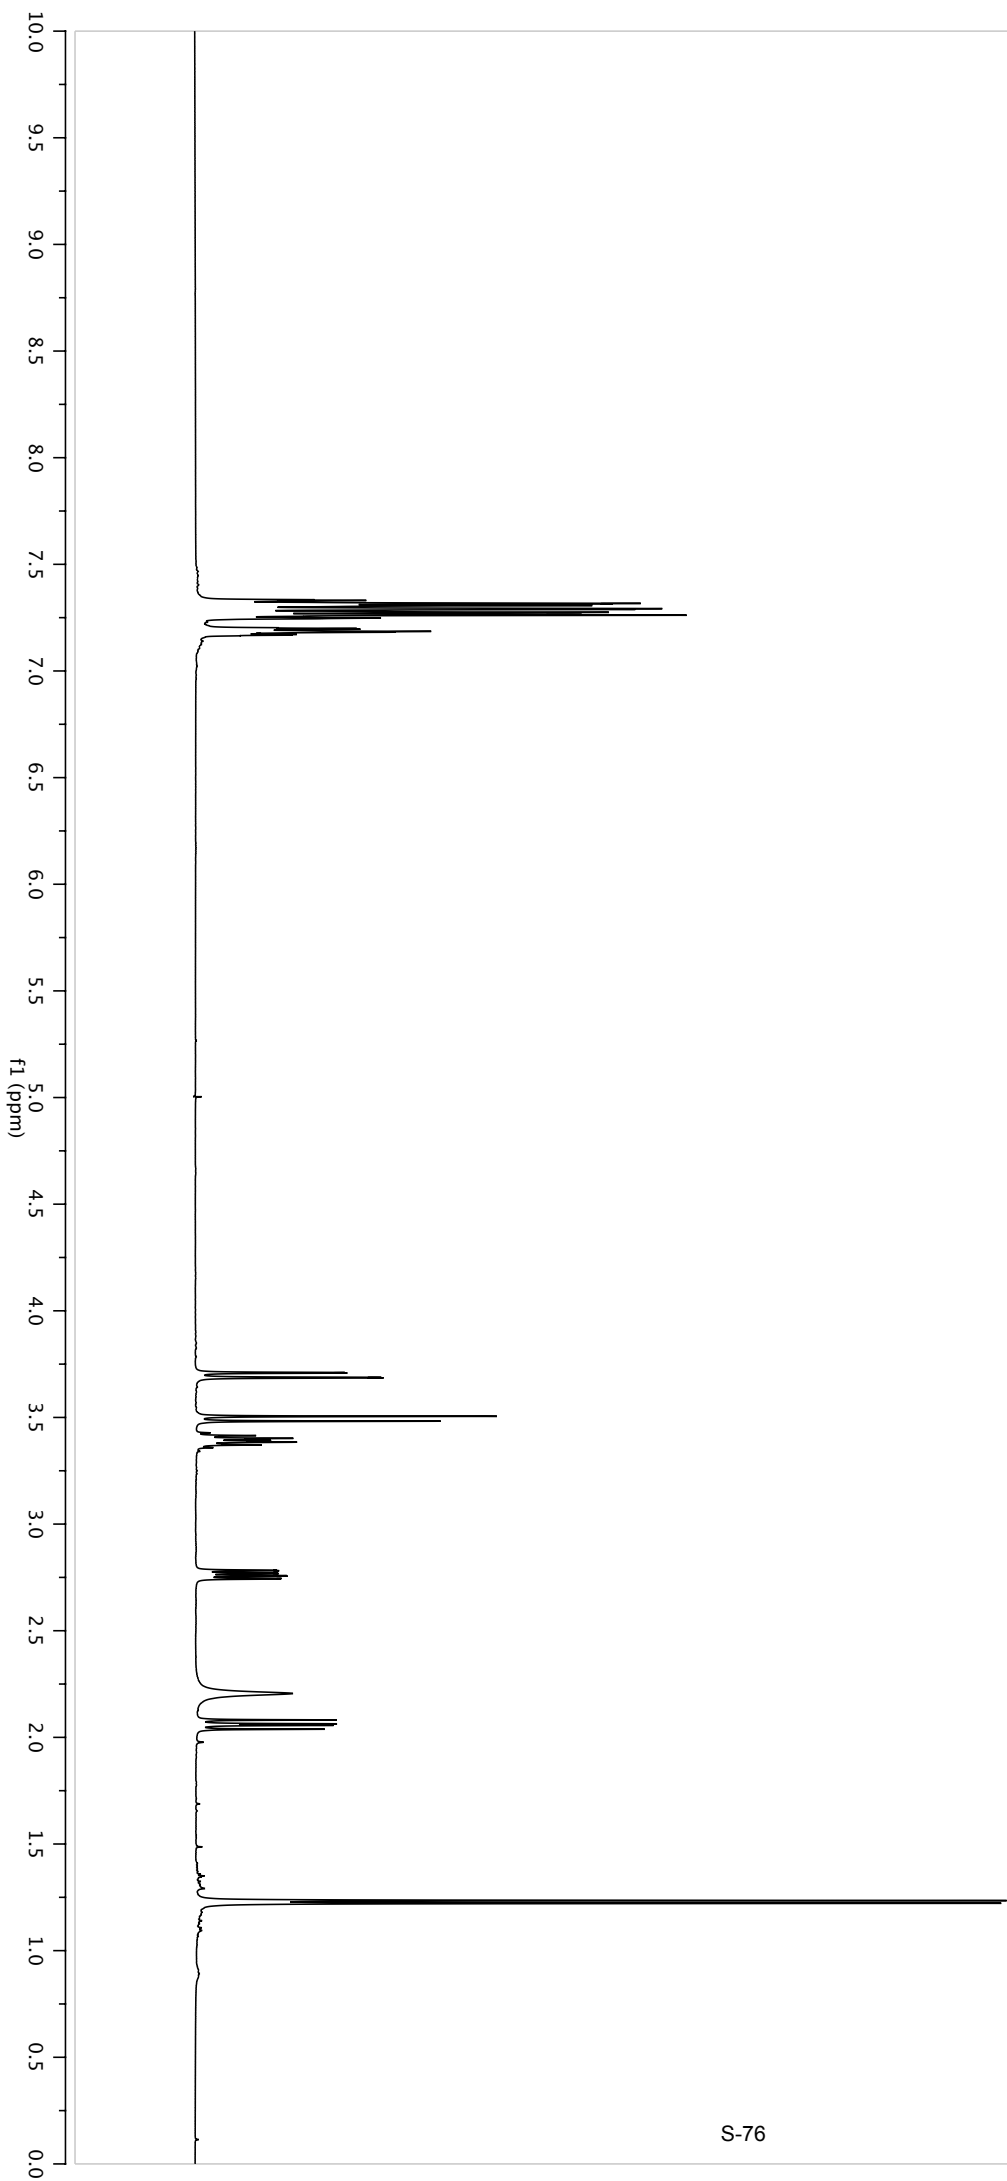

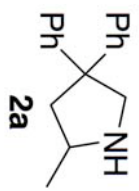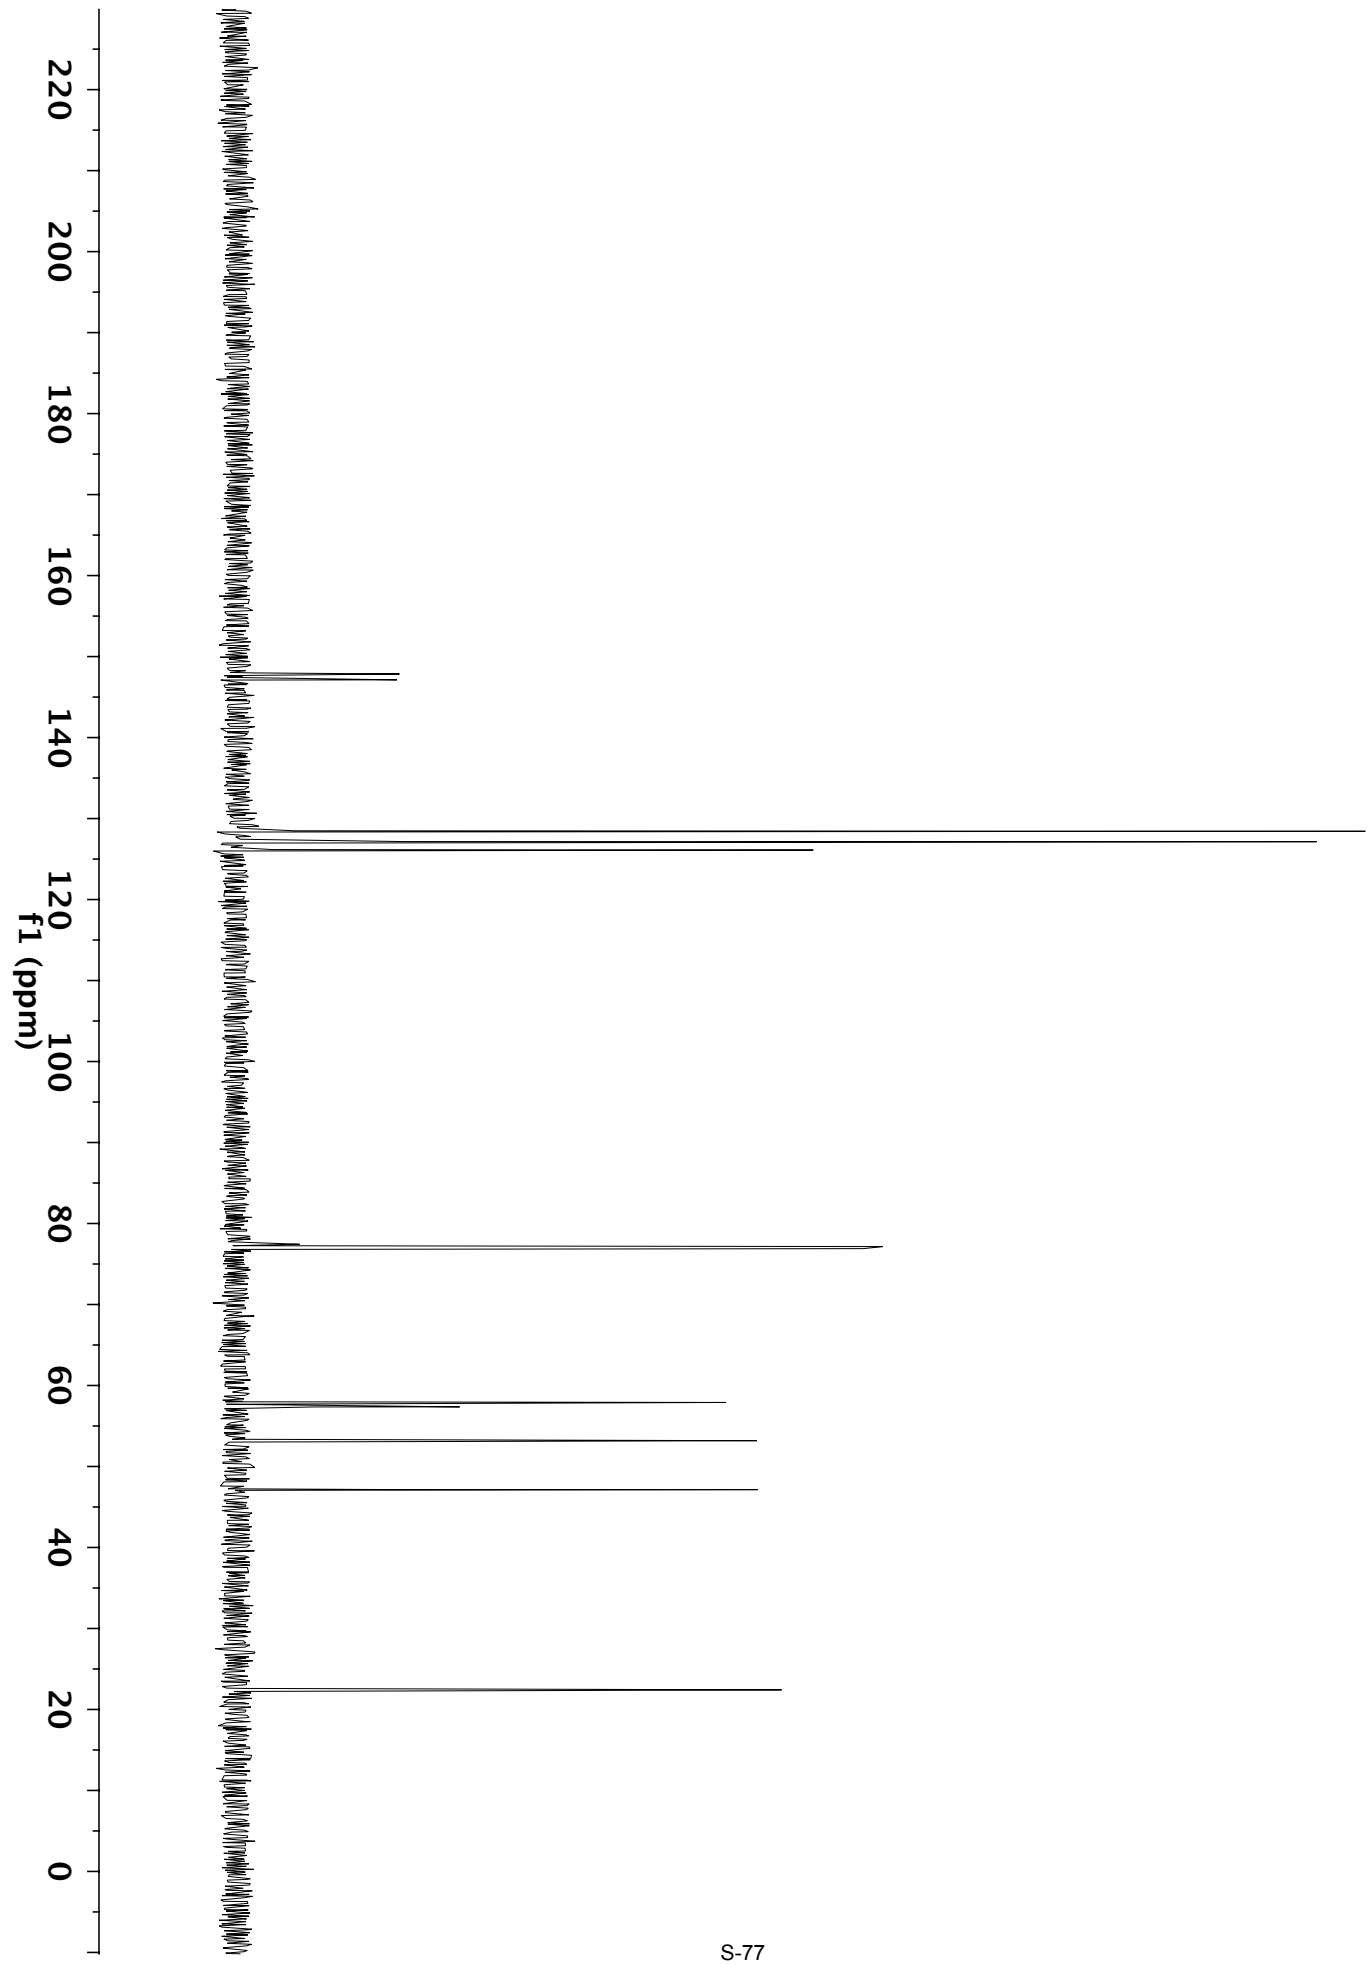

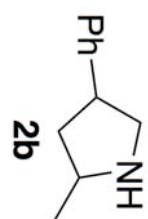

10.0 9.5 9.0 8.5 8.0 7.5 7.0 6.5 6.0 5.5 5.0 4.5 4.0 3.5 3.0 2.5 2.0 1.5 1.0 0.5

f1 (ppm)

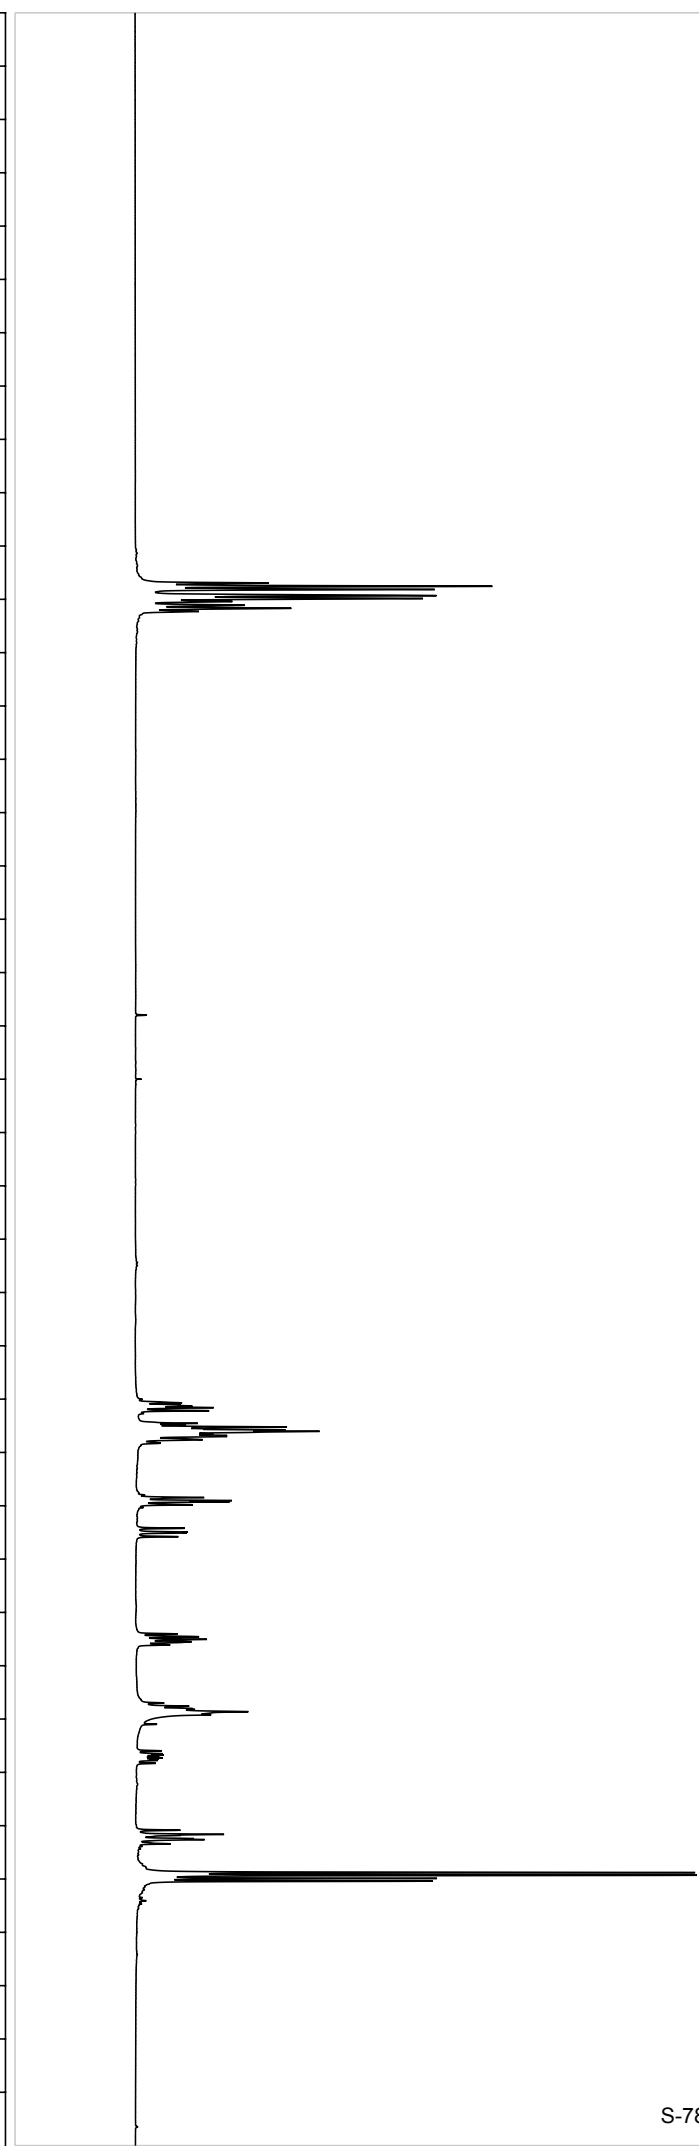

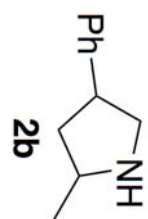

230  
220  
210  
200  
190  
180  
170  
160  
150  
140  
130  
120  
110  
100  
90  
80  
70  
60  
50  
40  
30  
20  
10  
0  
-10

f1 (ppm)

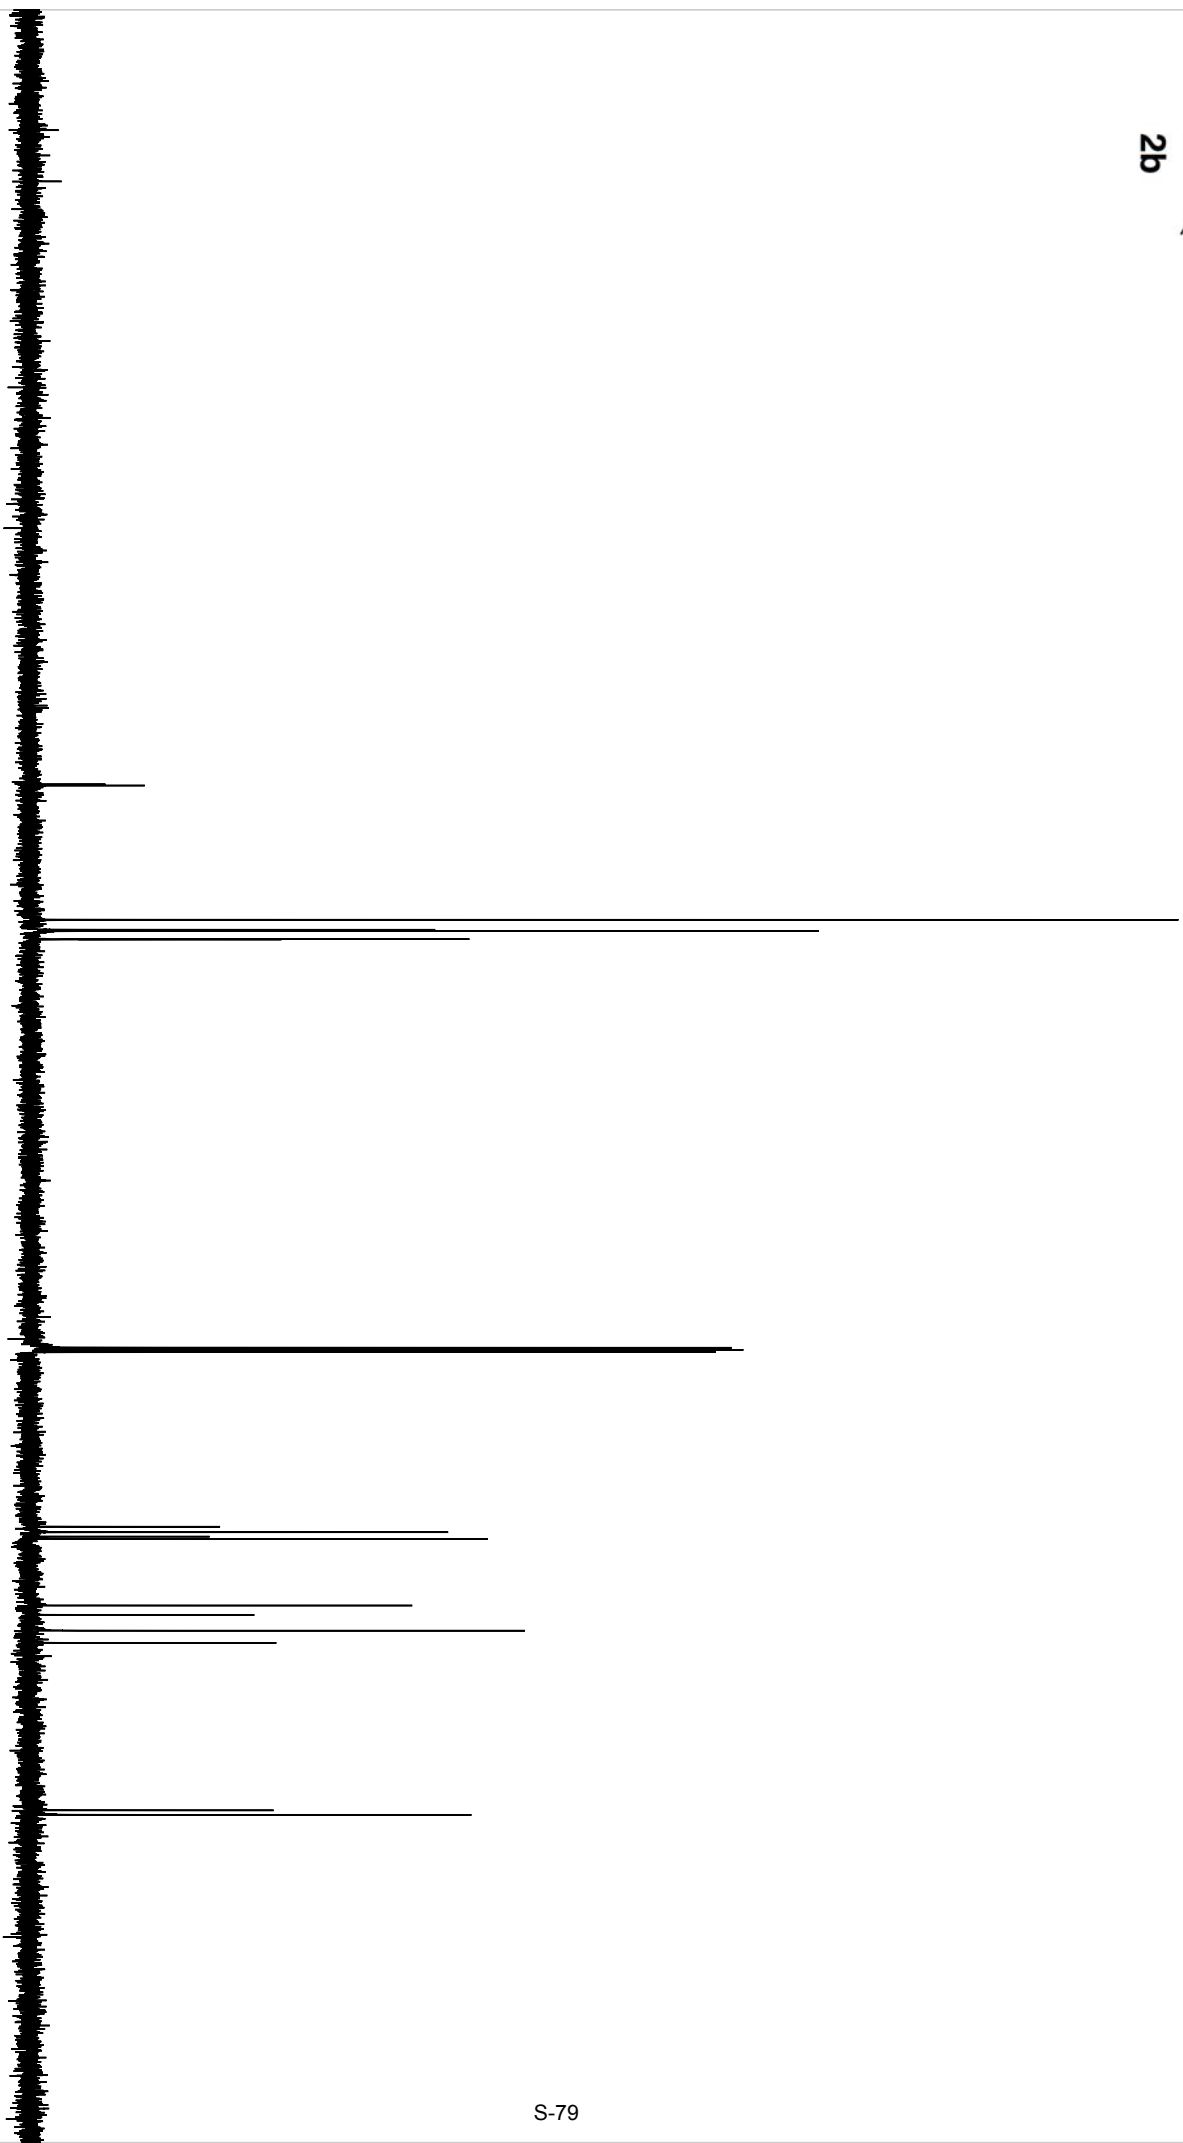

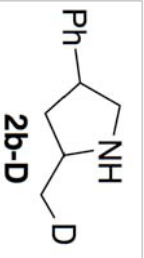

10.0 9.5 9.0 8.5 8.0 7.5 7.0 6.5 6.0 5.5 5.0 4.5 4.0 3.5 3.0 2.5 2.0 1.5 1.0 0.5 0.0

f1 (ppm)

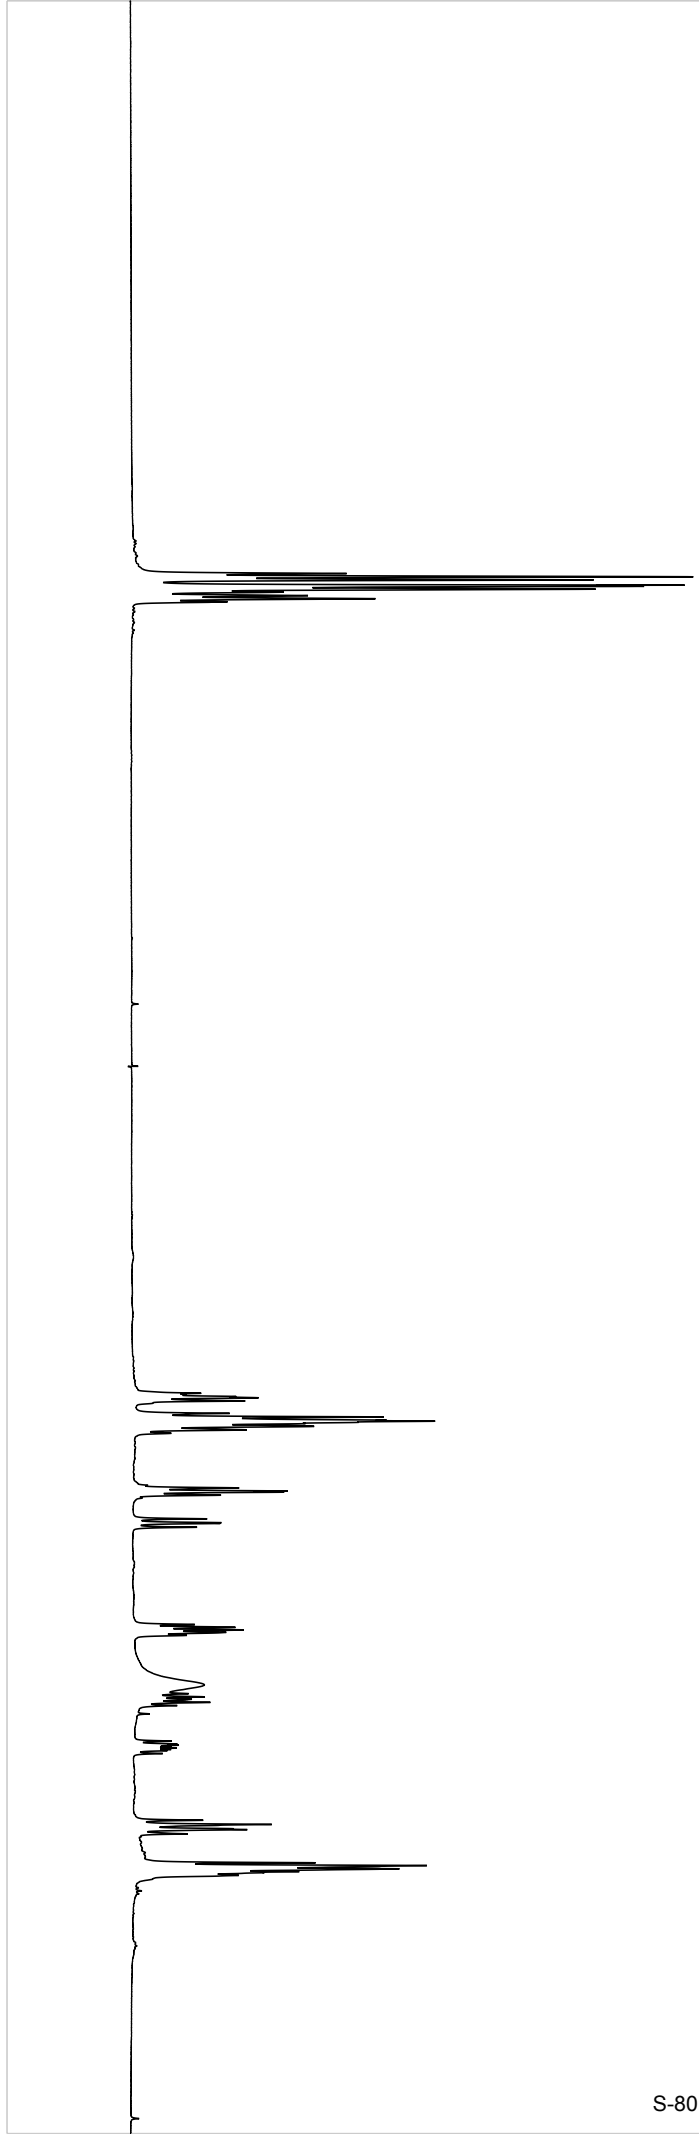



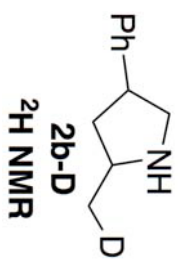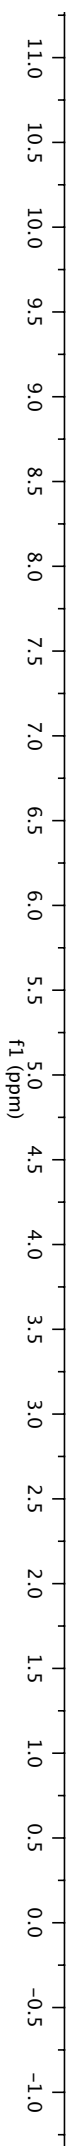

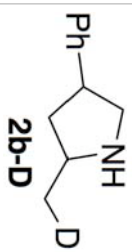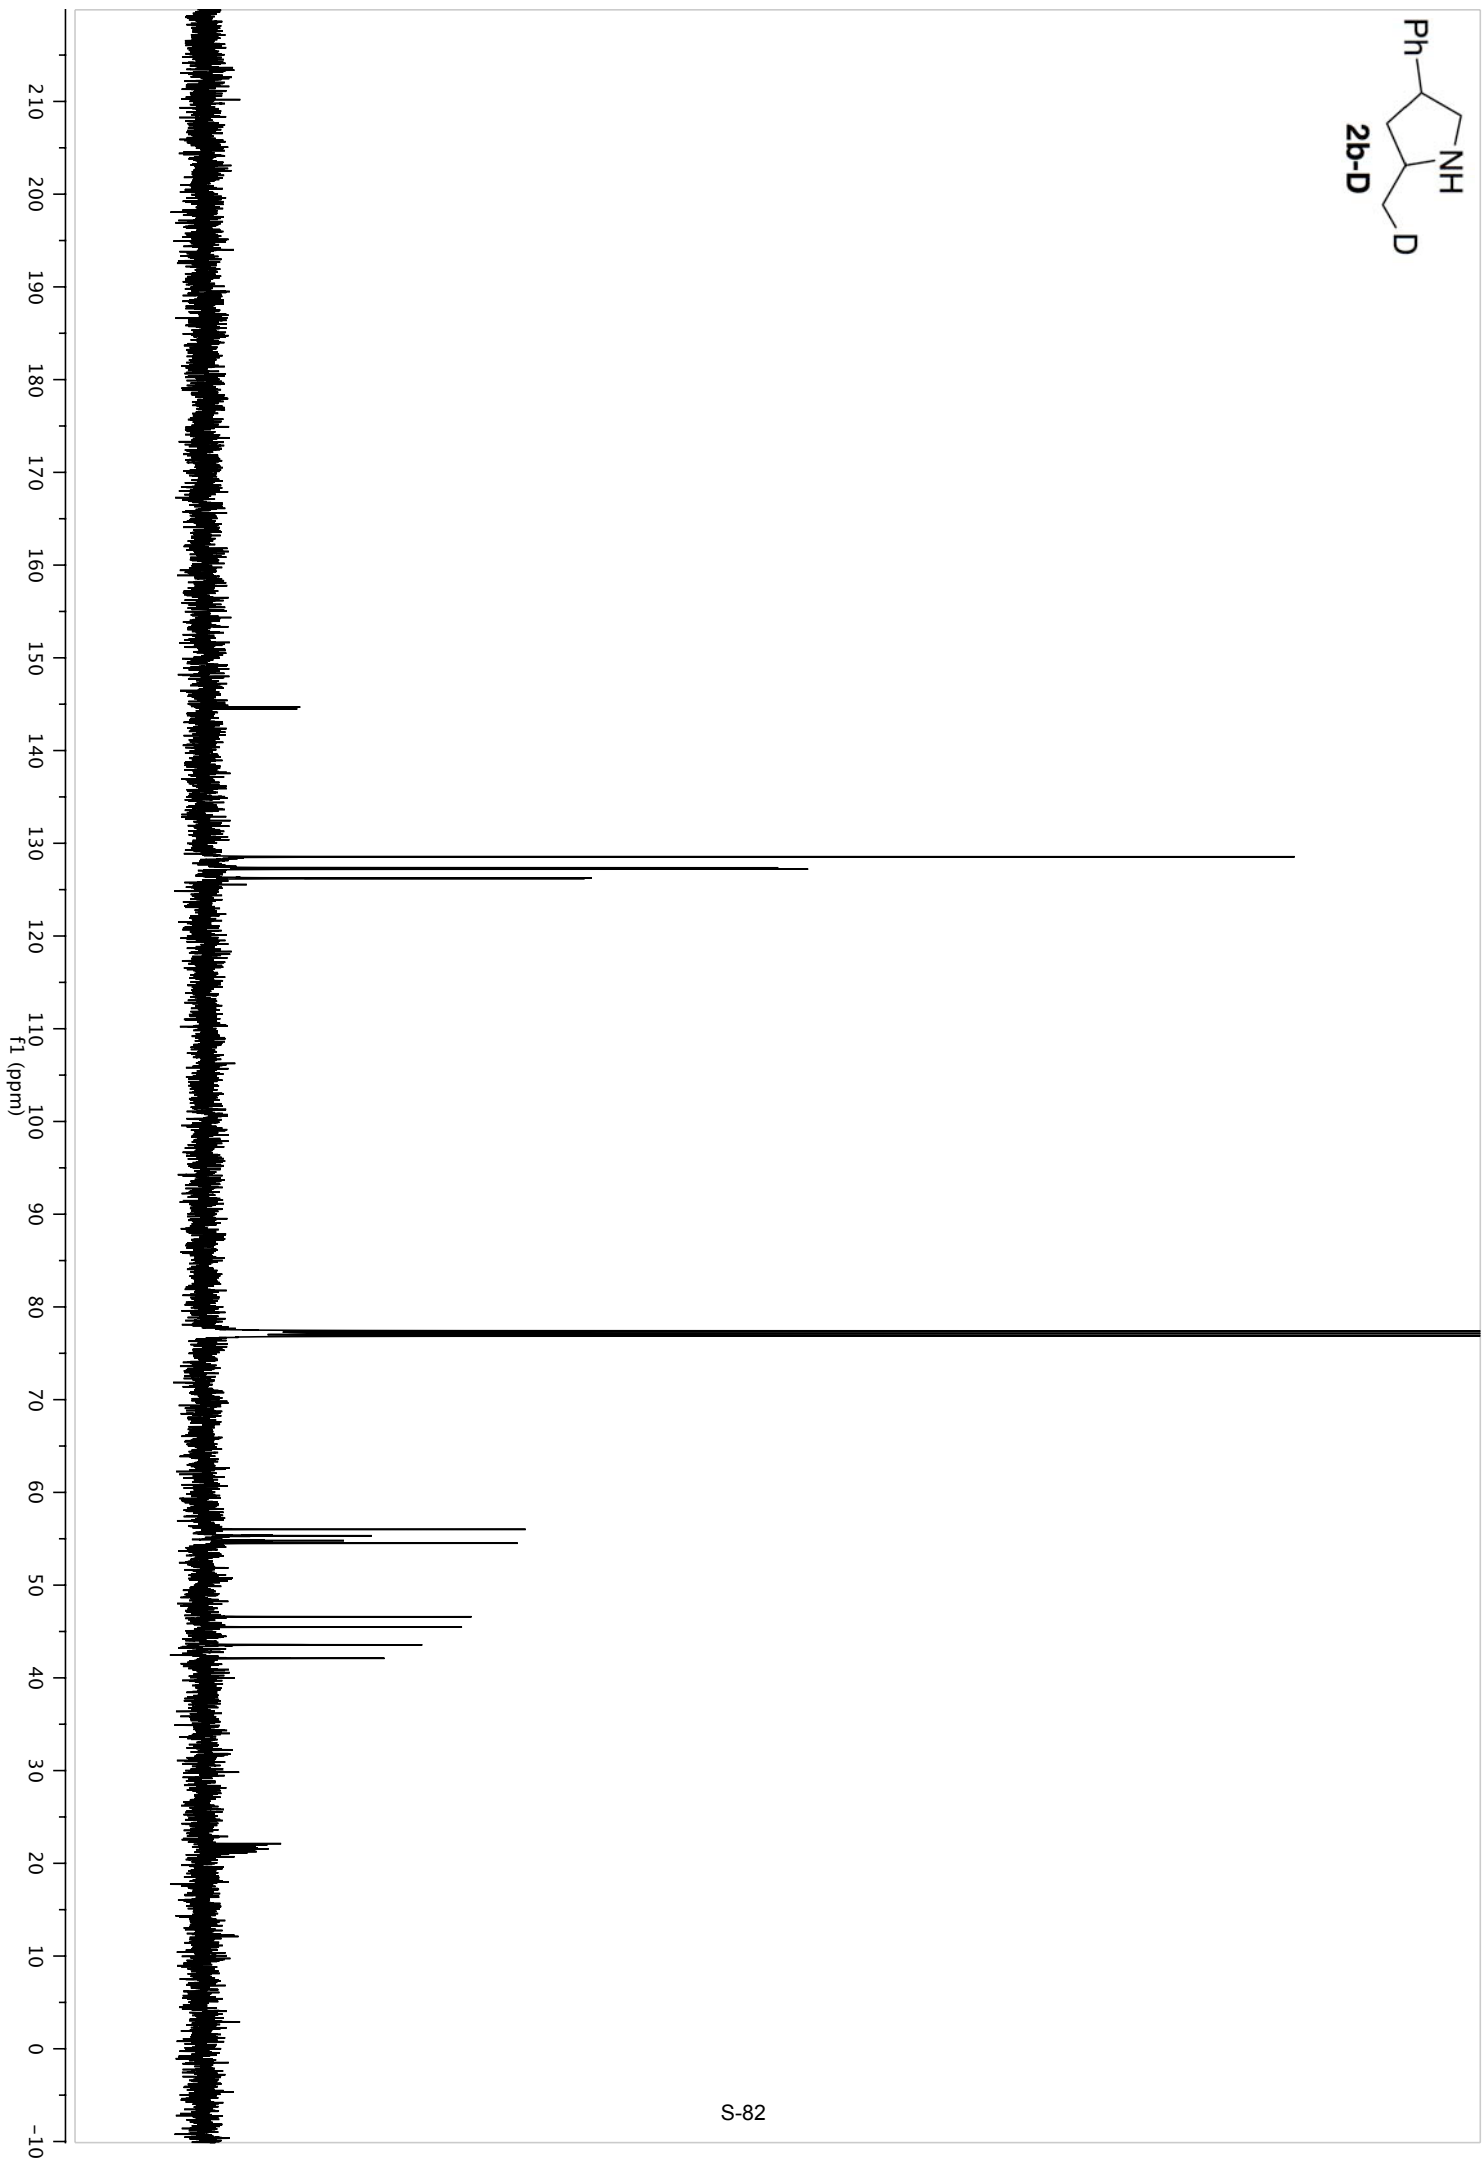

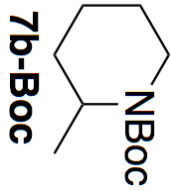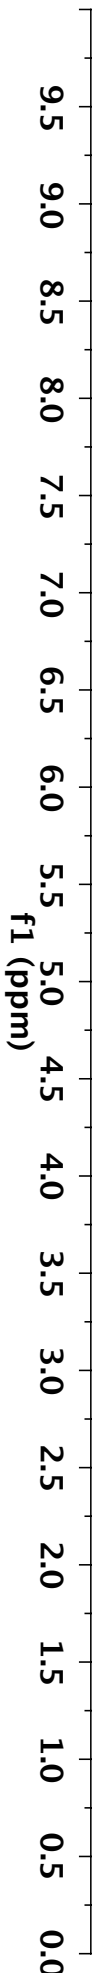

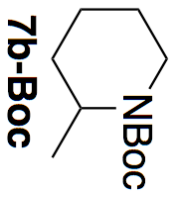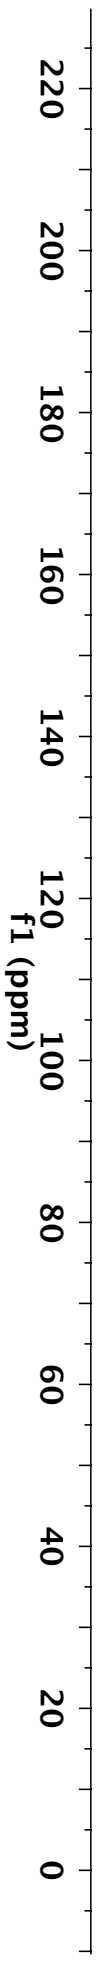

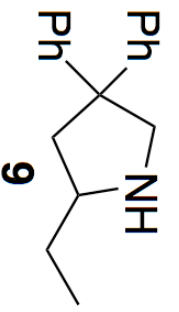

10.0 9.5 9.0 8.5 8.0 7.5 7.0 6.5 6.0 5.5 5.0 4.5 4.0 3.5 3.0 2.5 2.0 1.5 1.0 0.5 0.0

f1 (ppm)

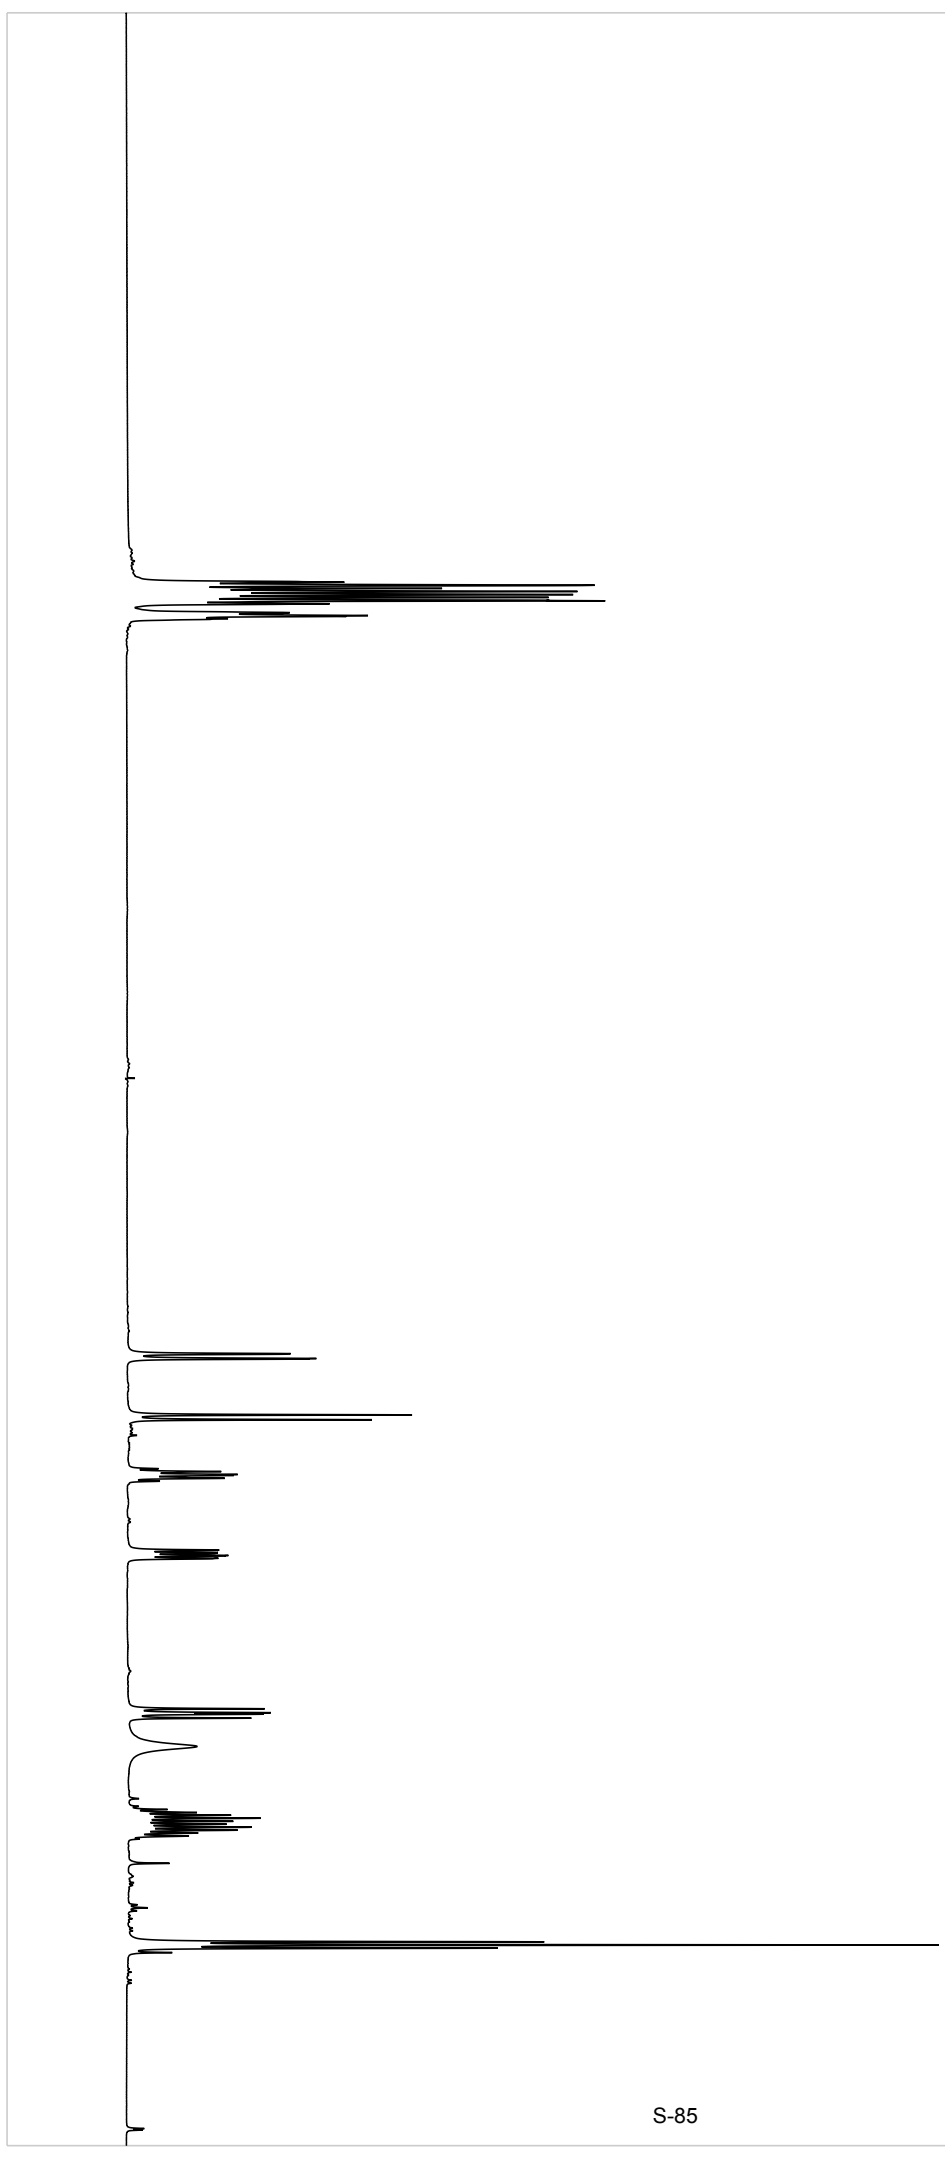

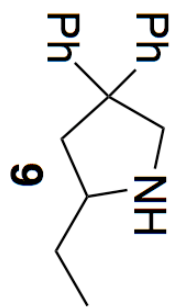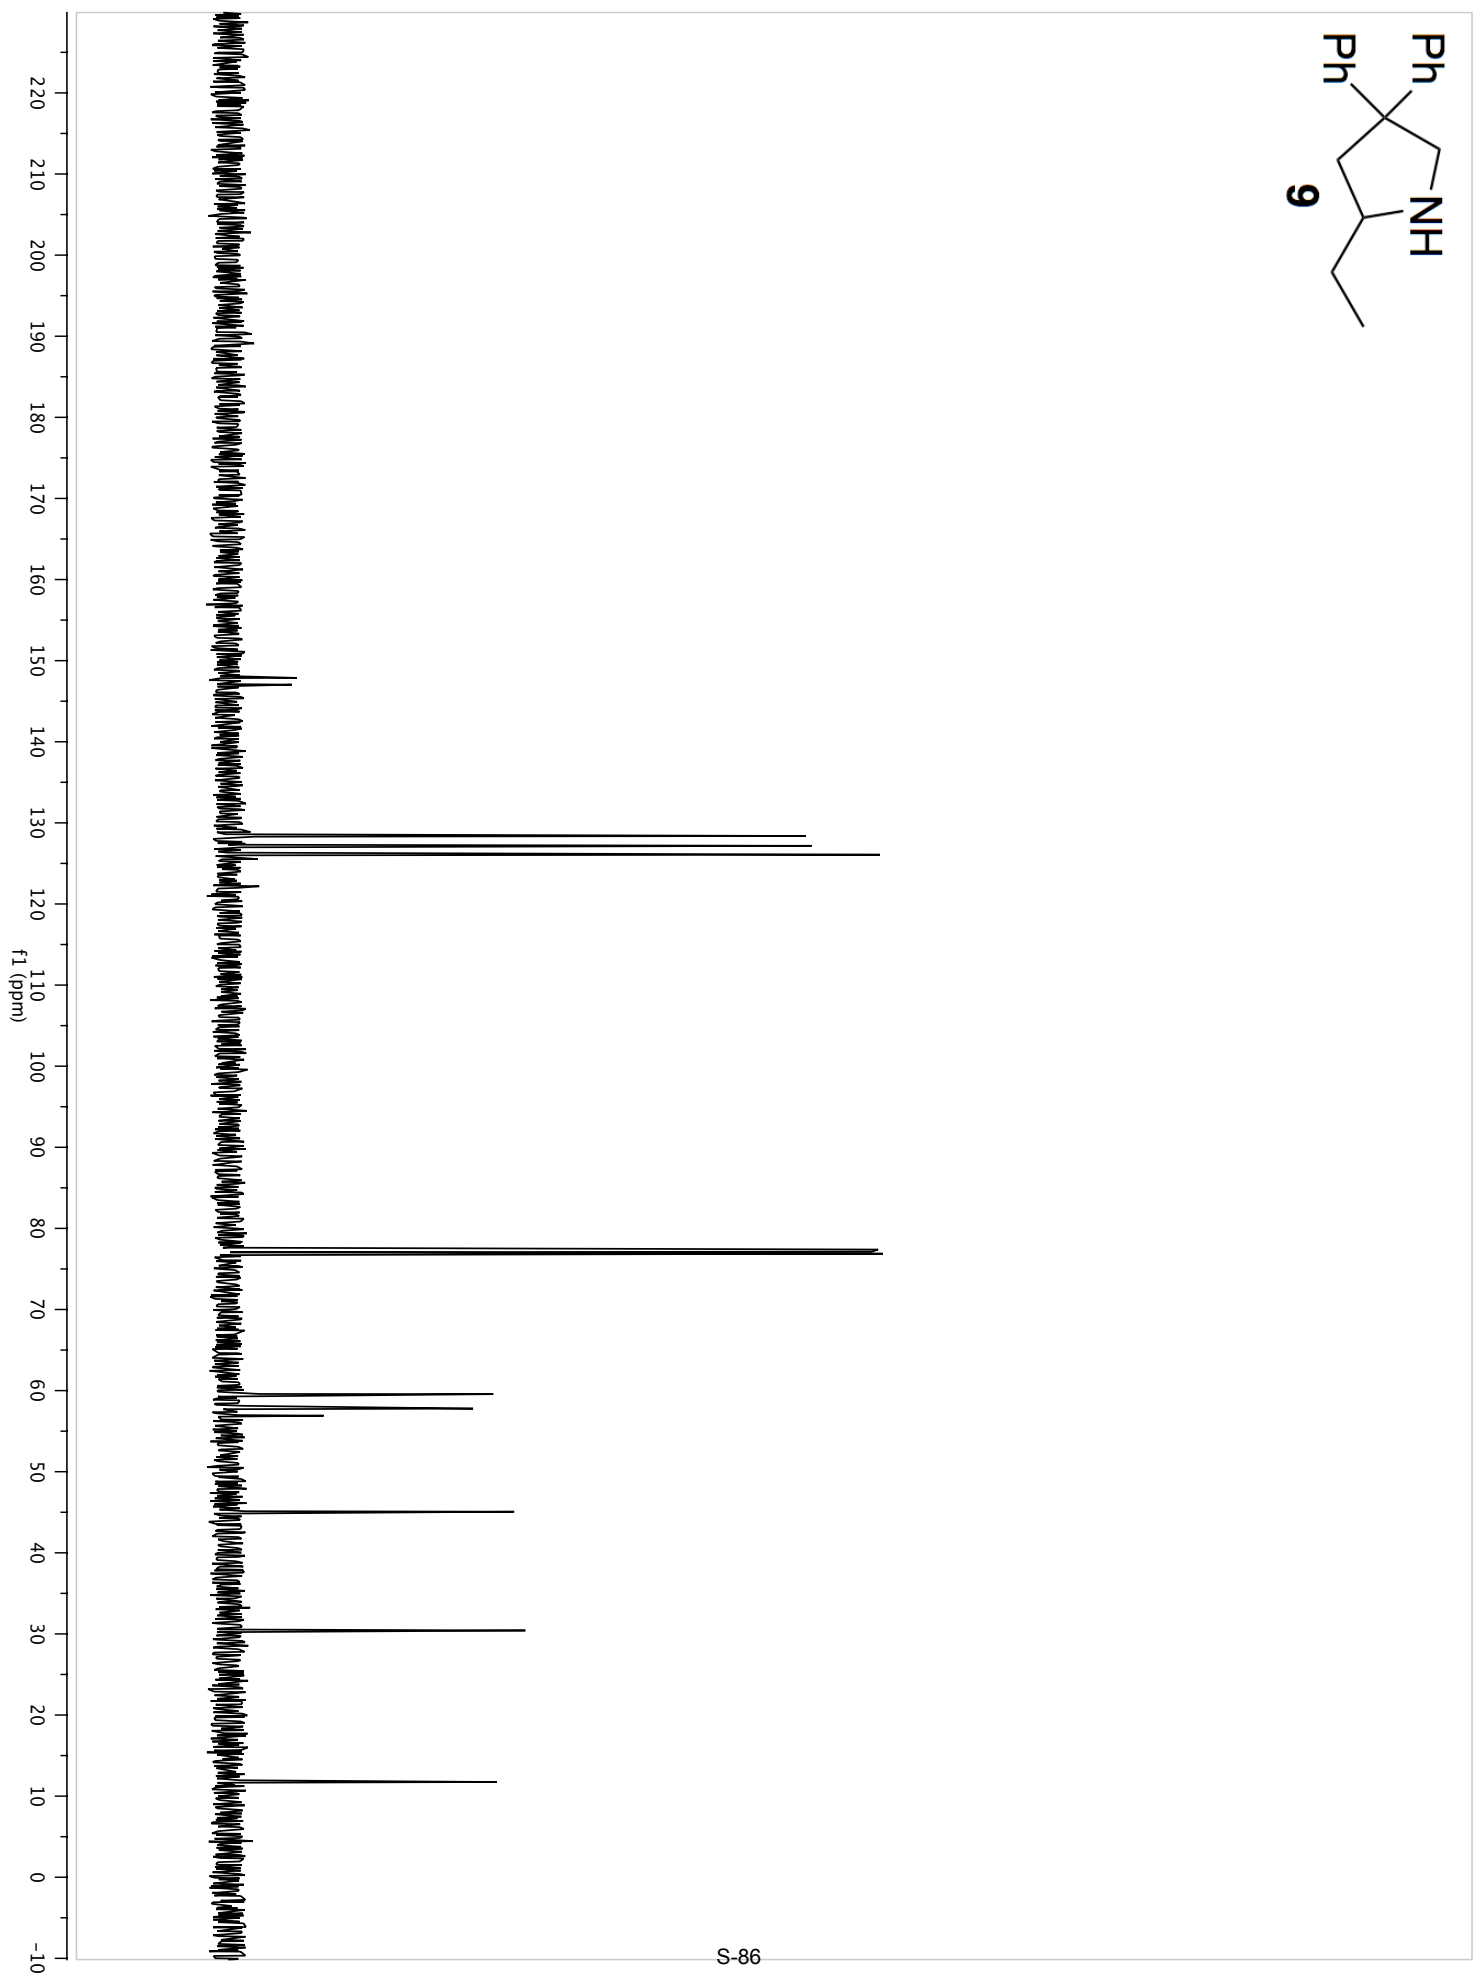

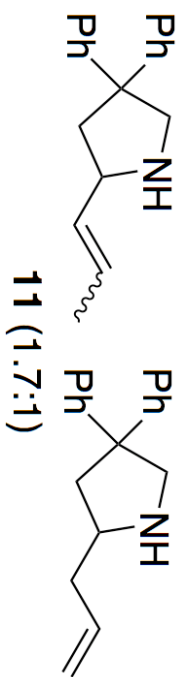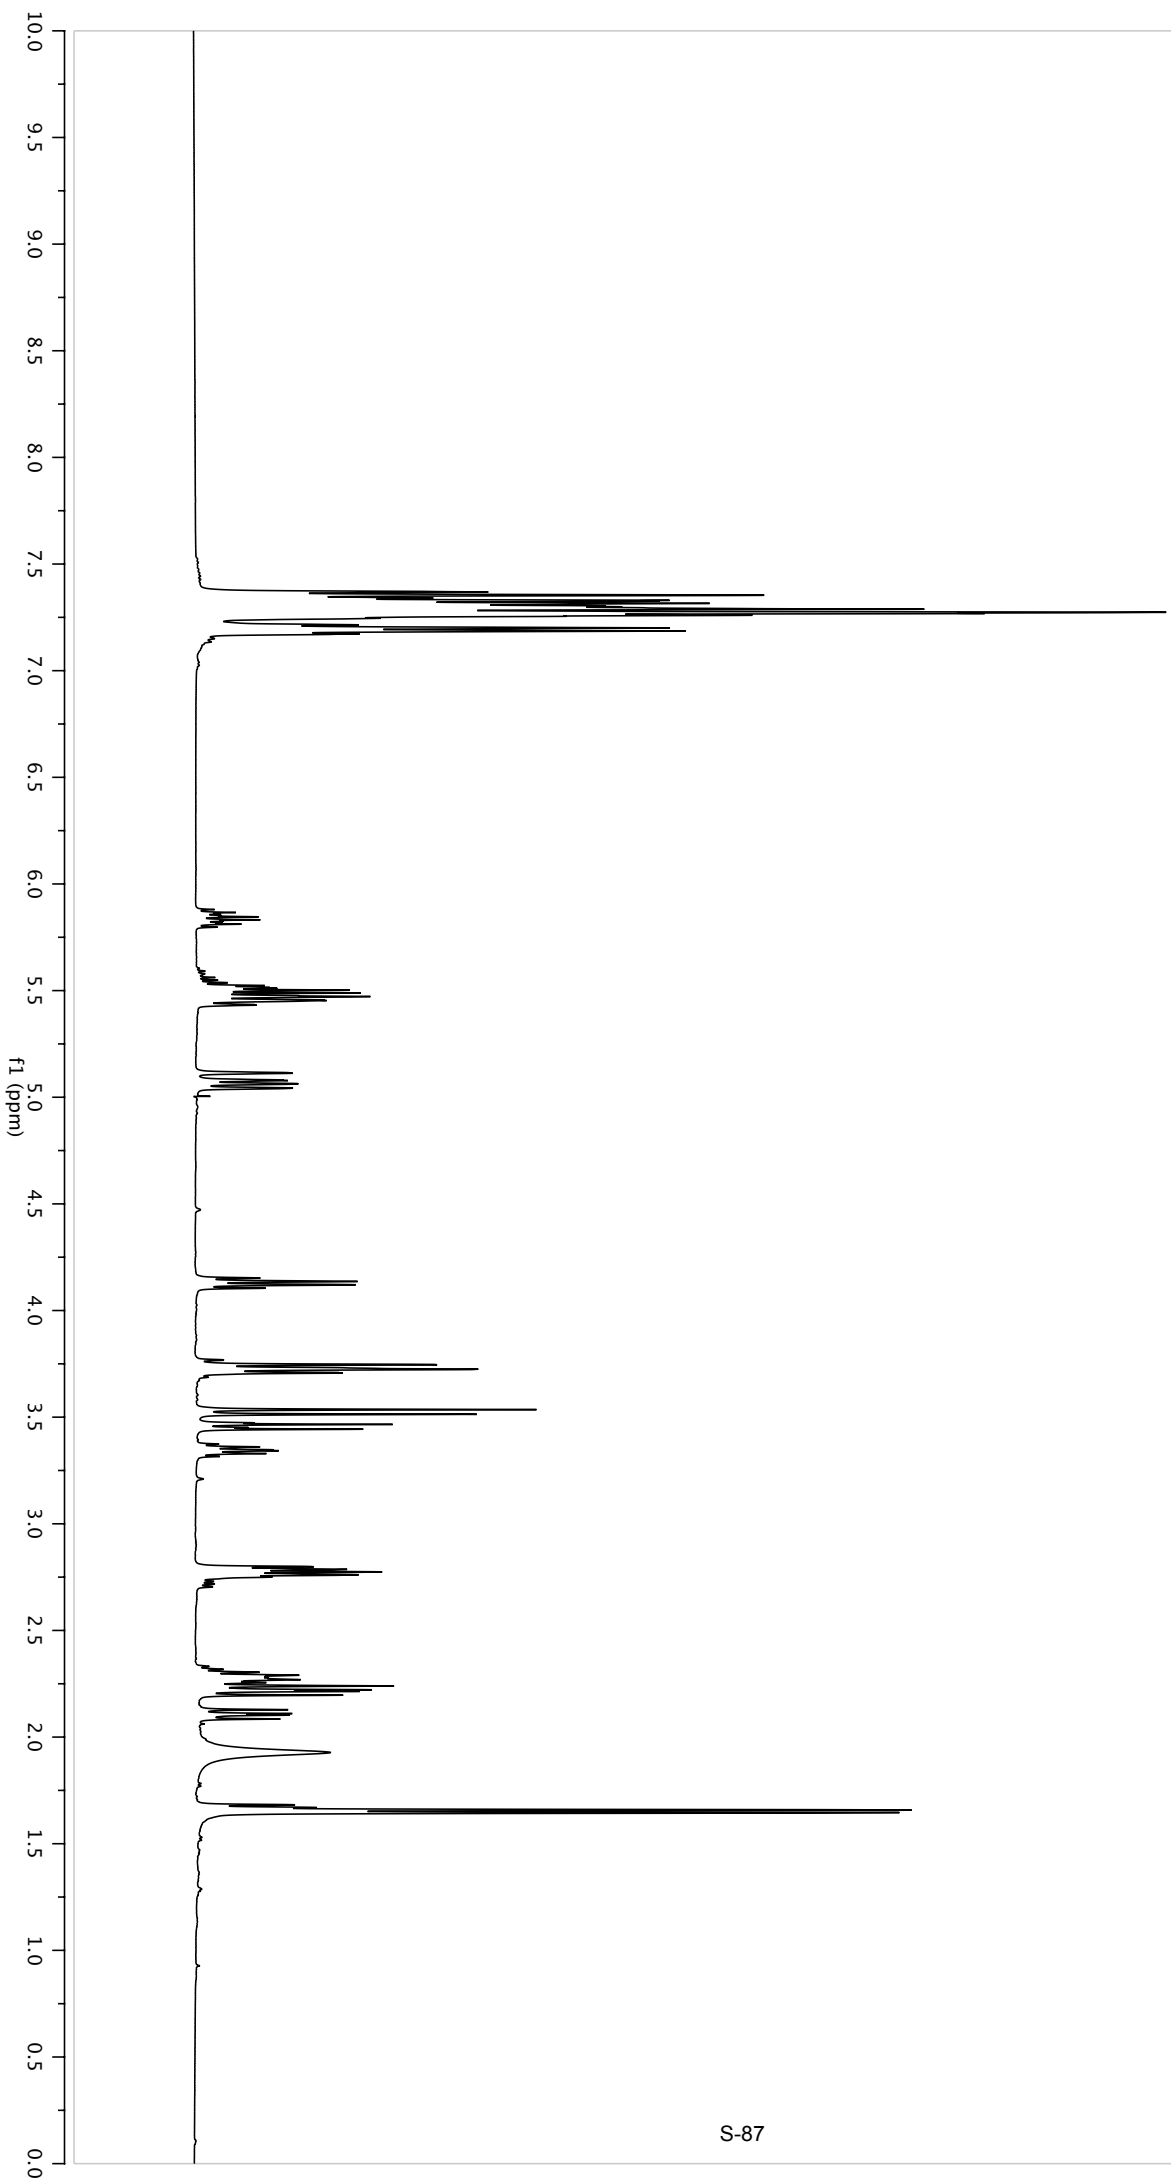

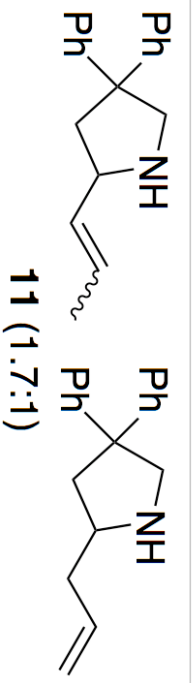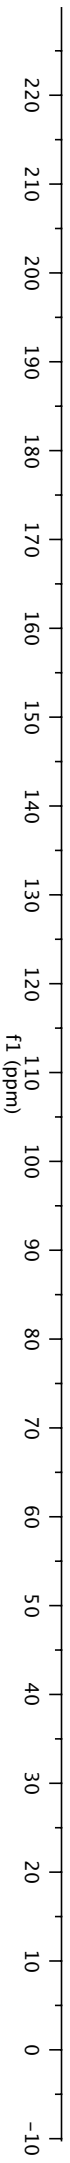





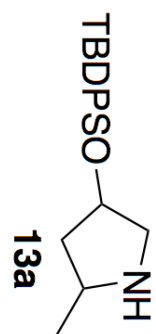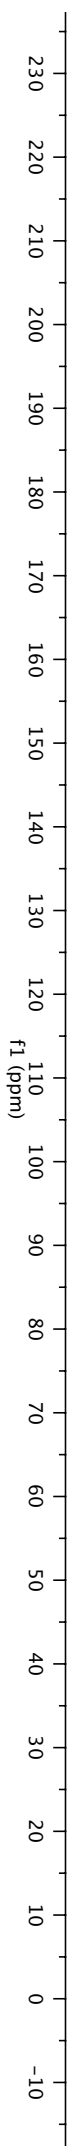

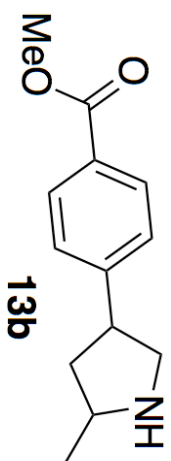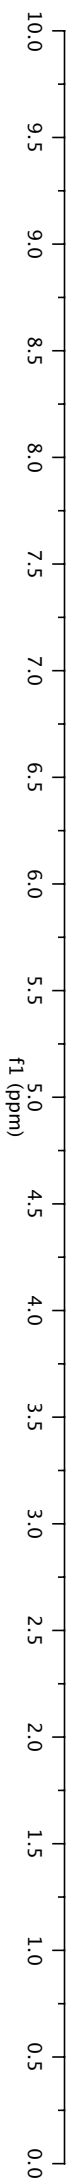

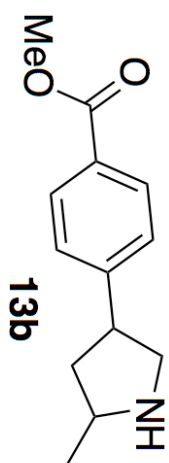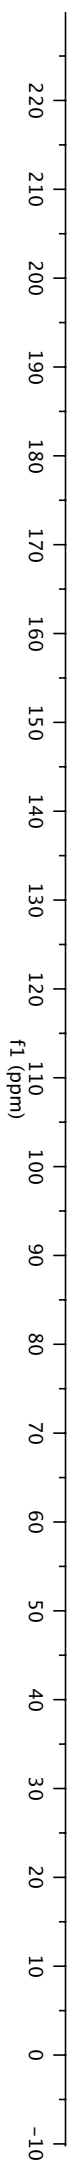

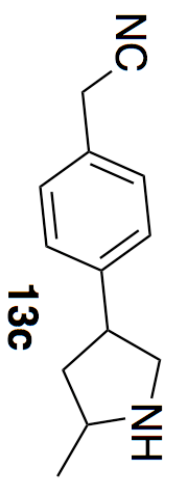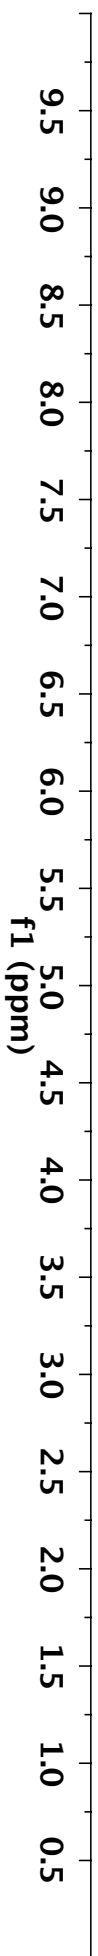

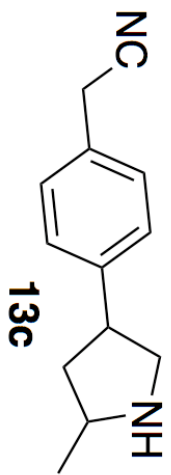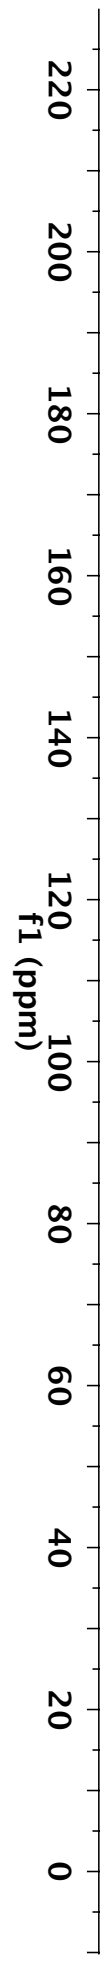

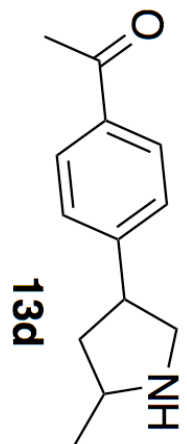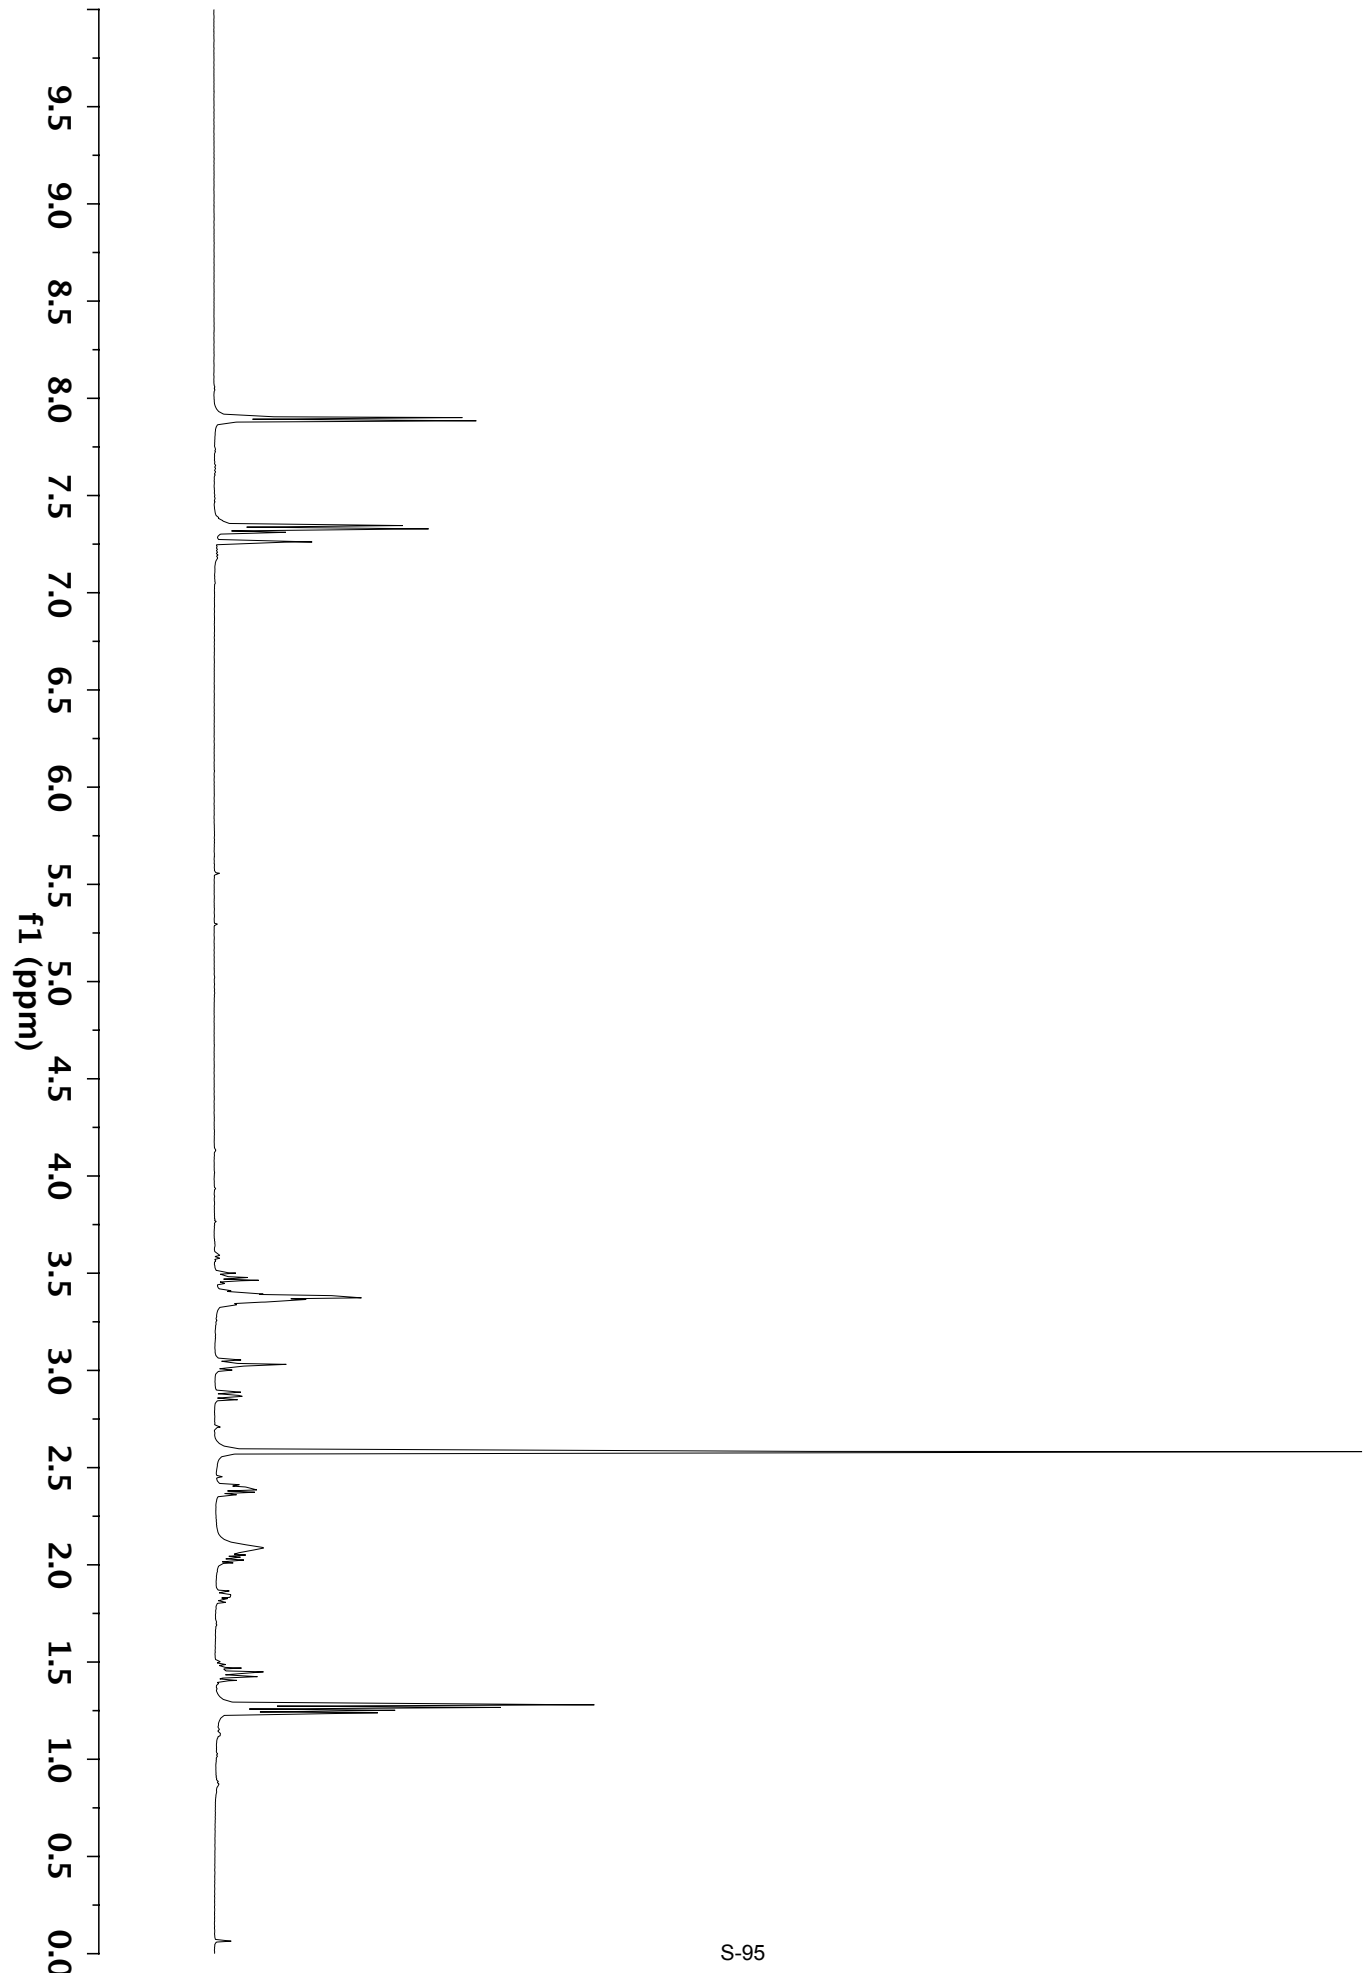

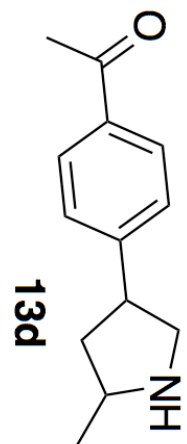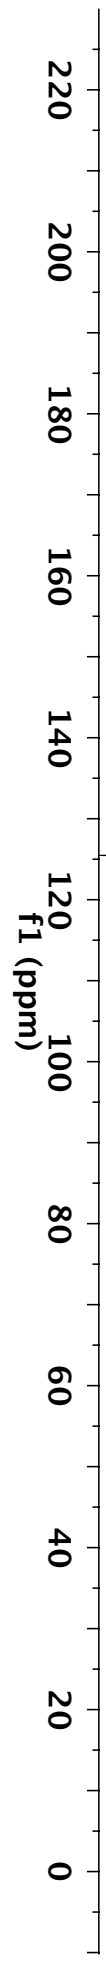



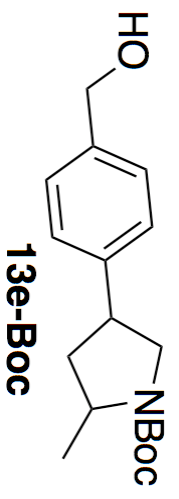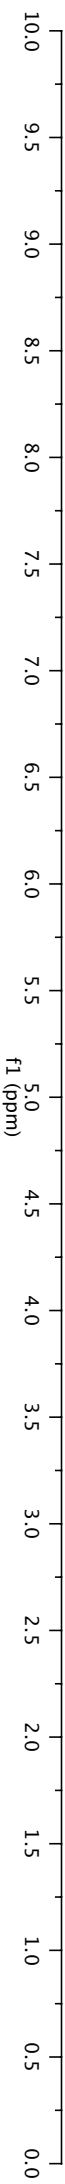

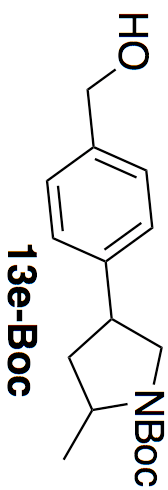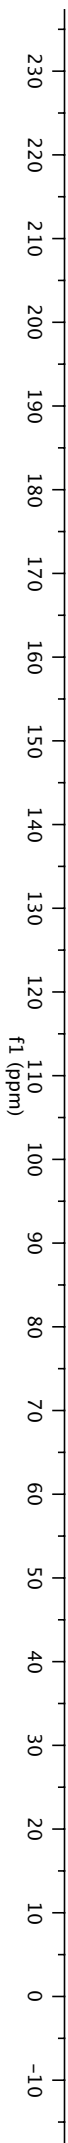

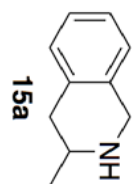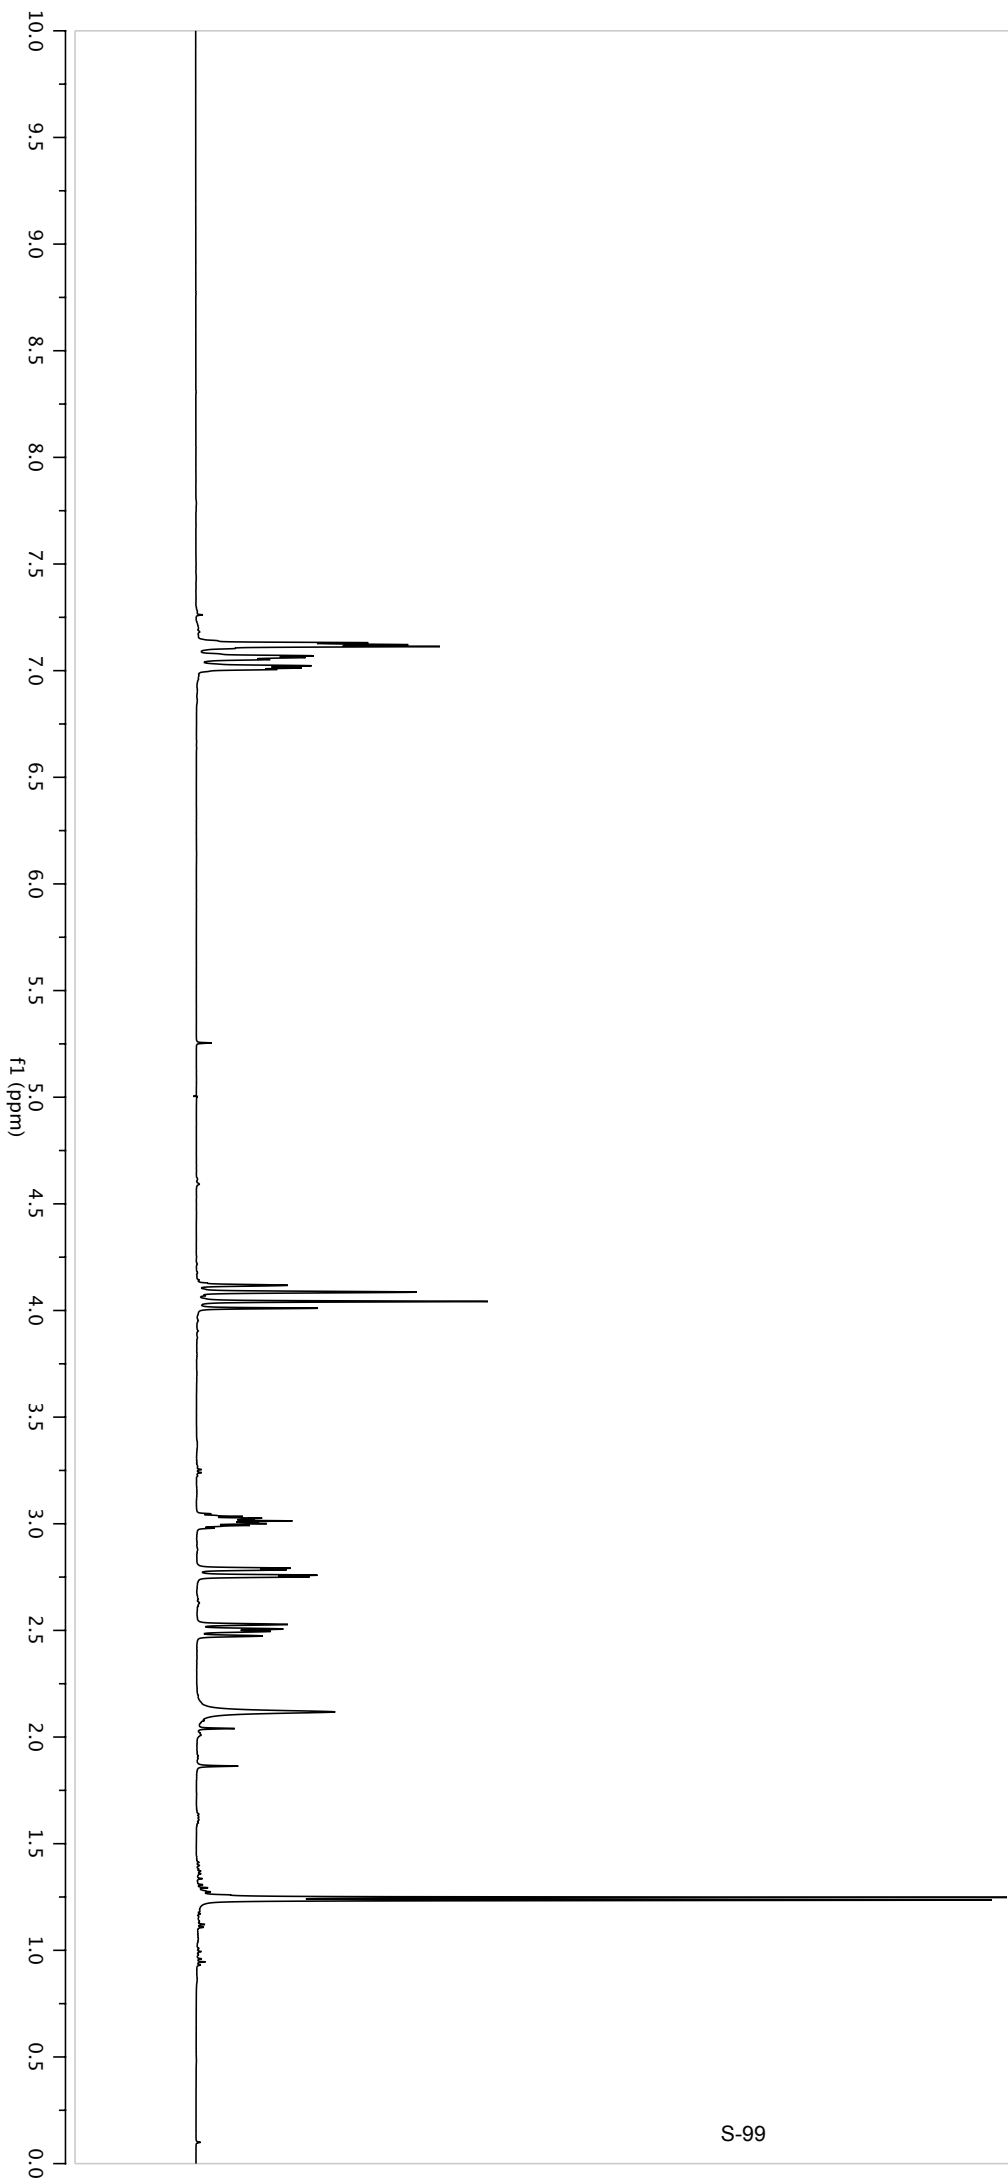

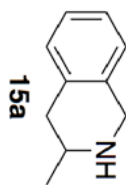

230  
220  
210  
200  
190  
180  
170  
160  
150  
140  
130  
120  
110  
100  
90  
80  
70  
60  
50  
40  
30  
20  
10  
0  
-10

f1 (ppm)

S-100

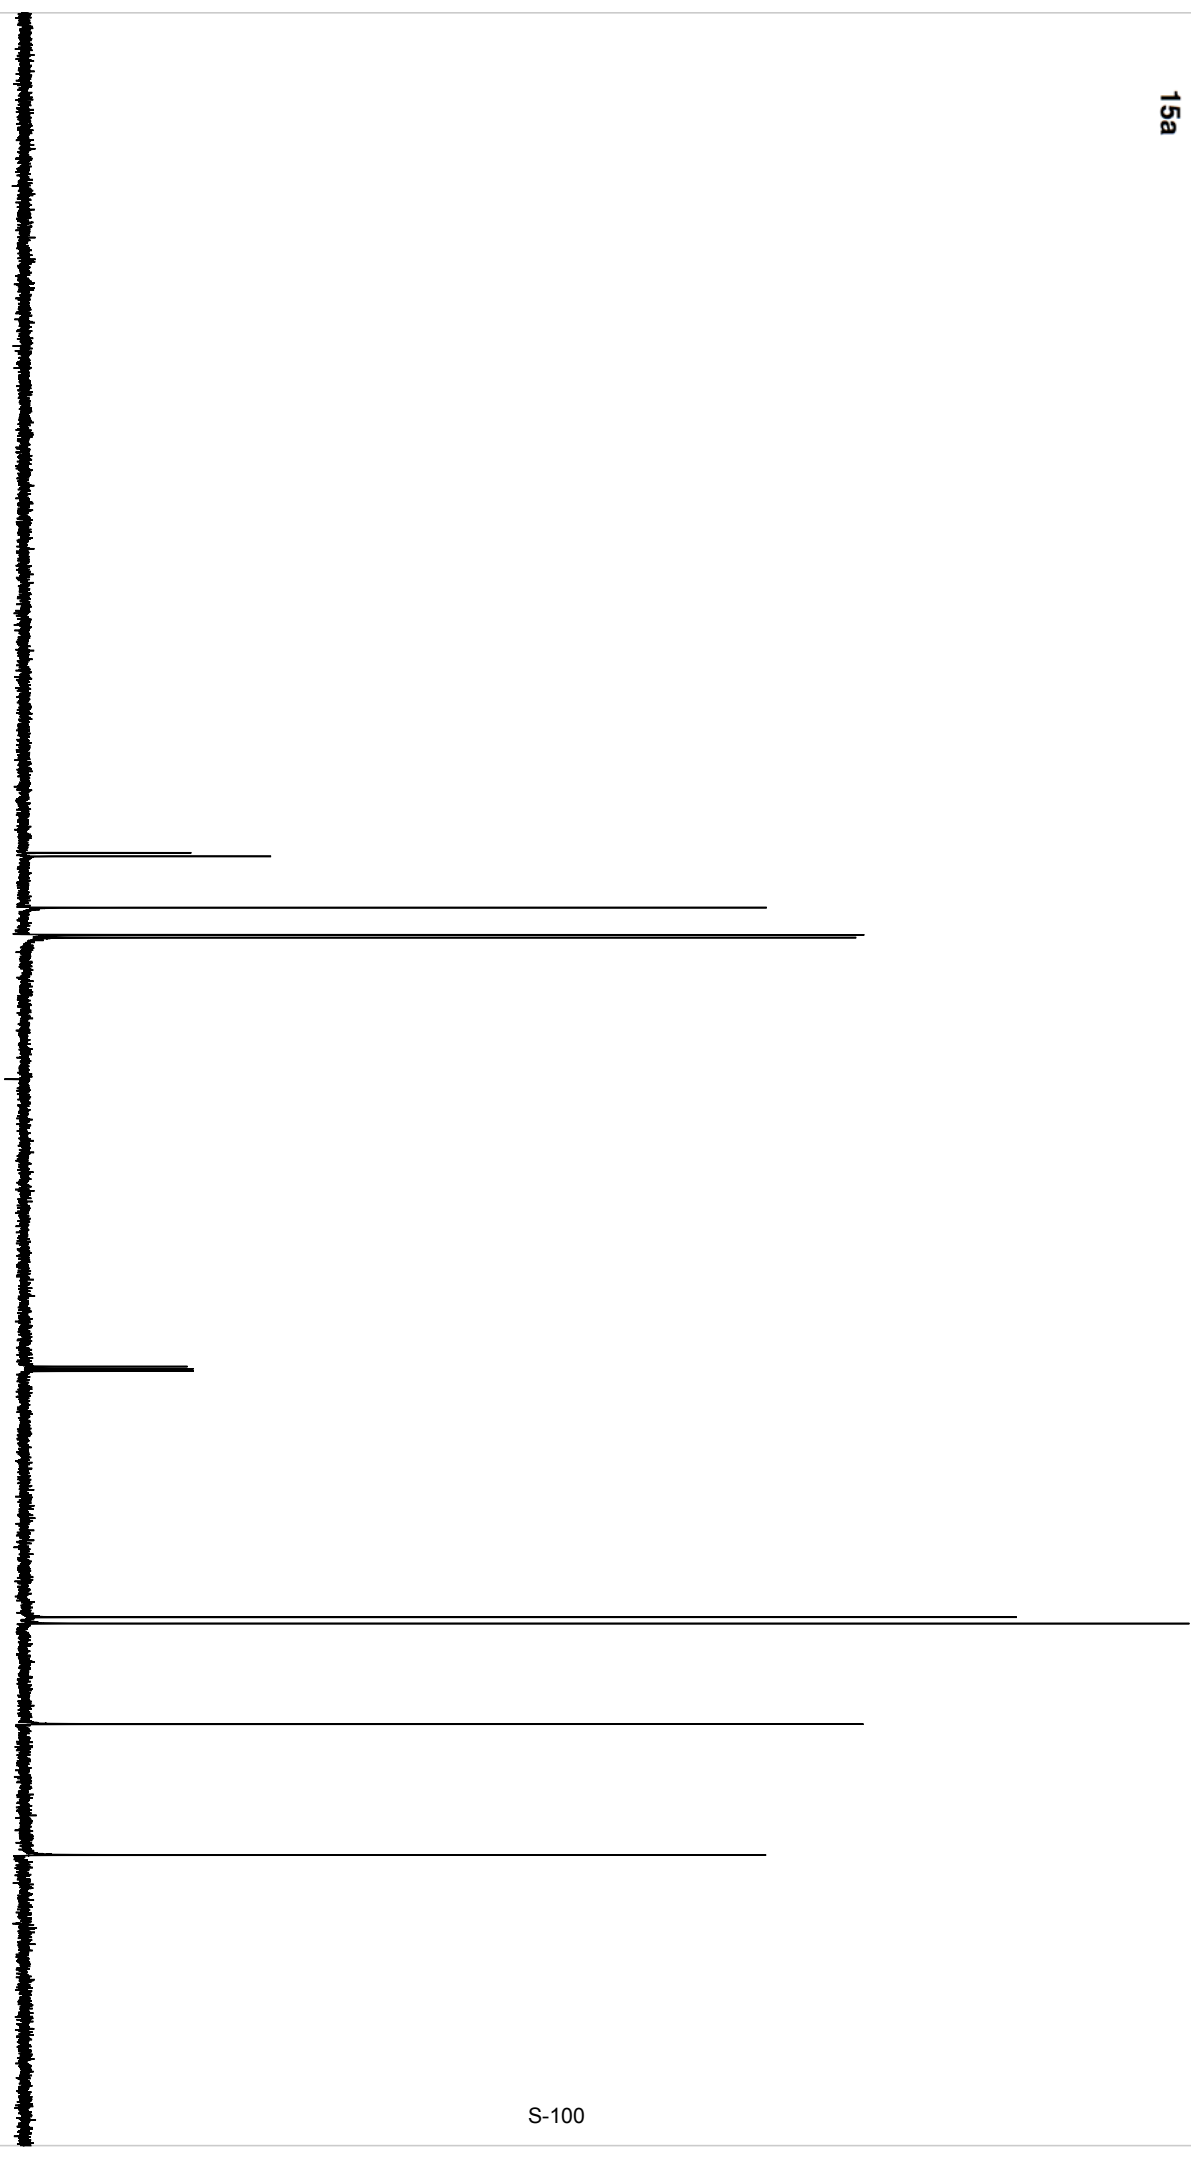

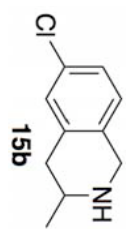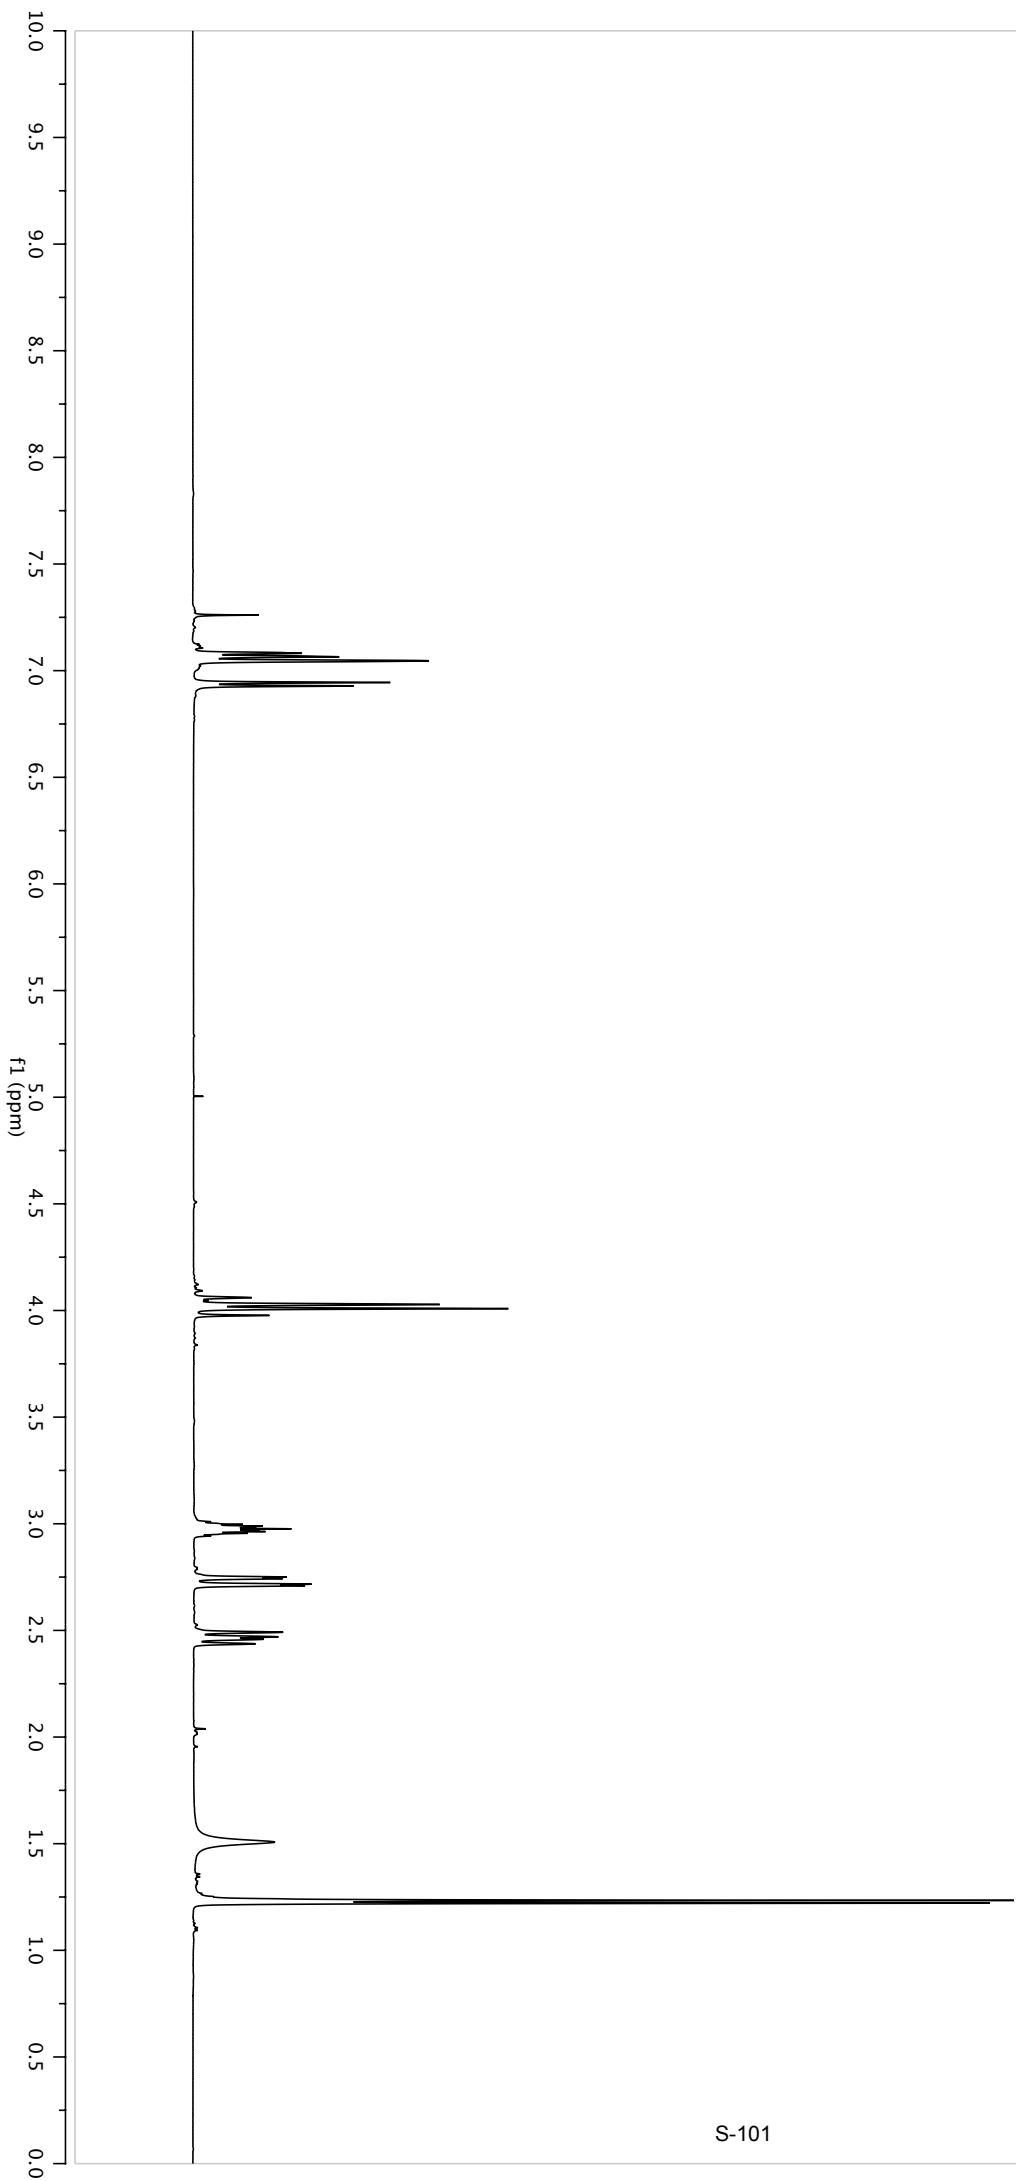

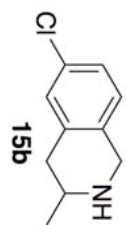

220  
210  
200  
190  
180  
170  
160  
150  
140  
130  
120  
110  
100  
90  
80  
70  
60  
50  
40  
30  
20  
10  
0  
-10

f1 (ppm)

S-102

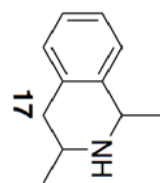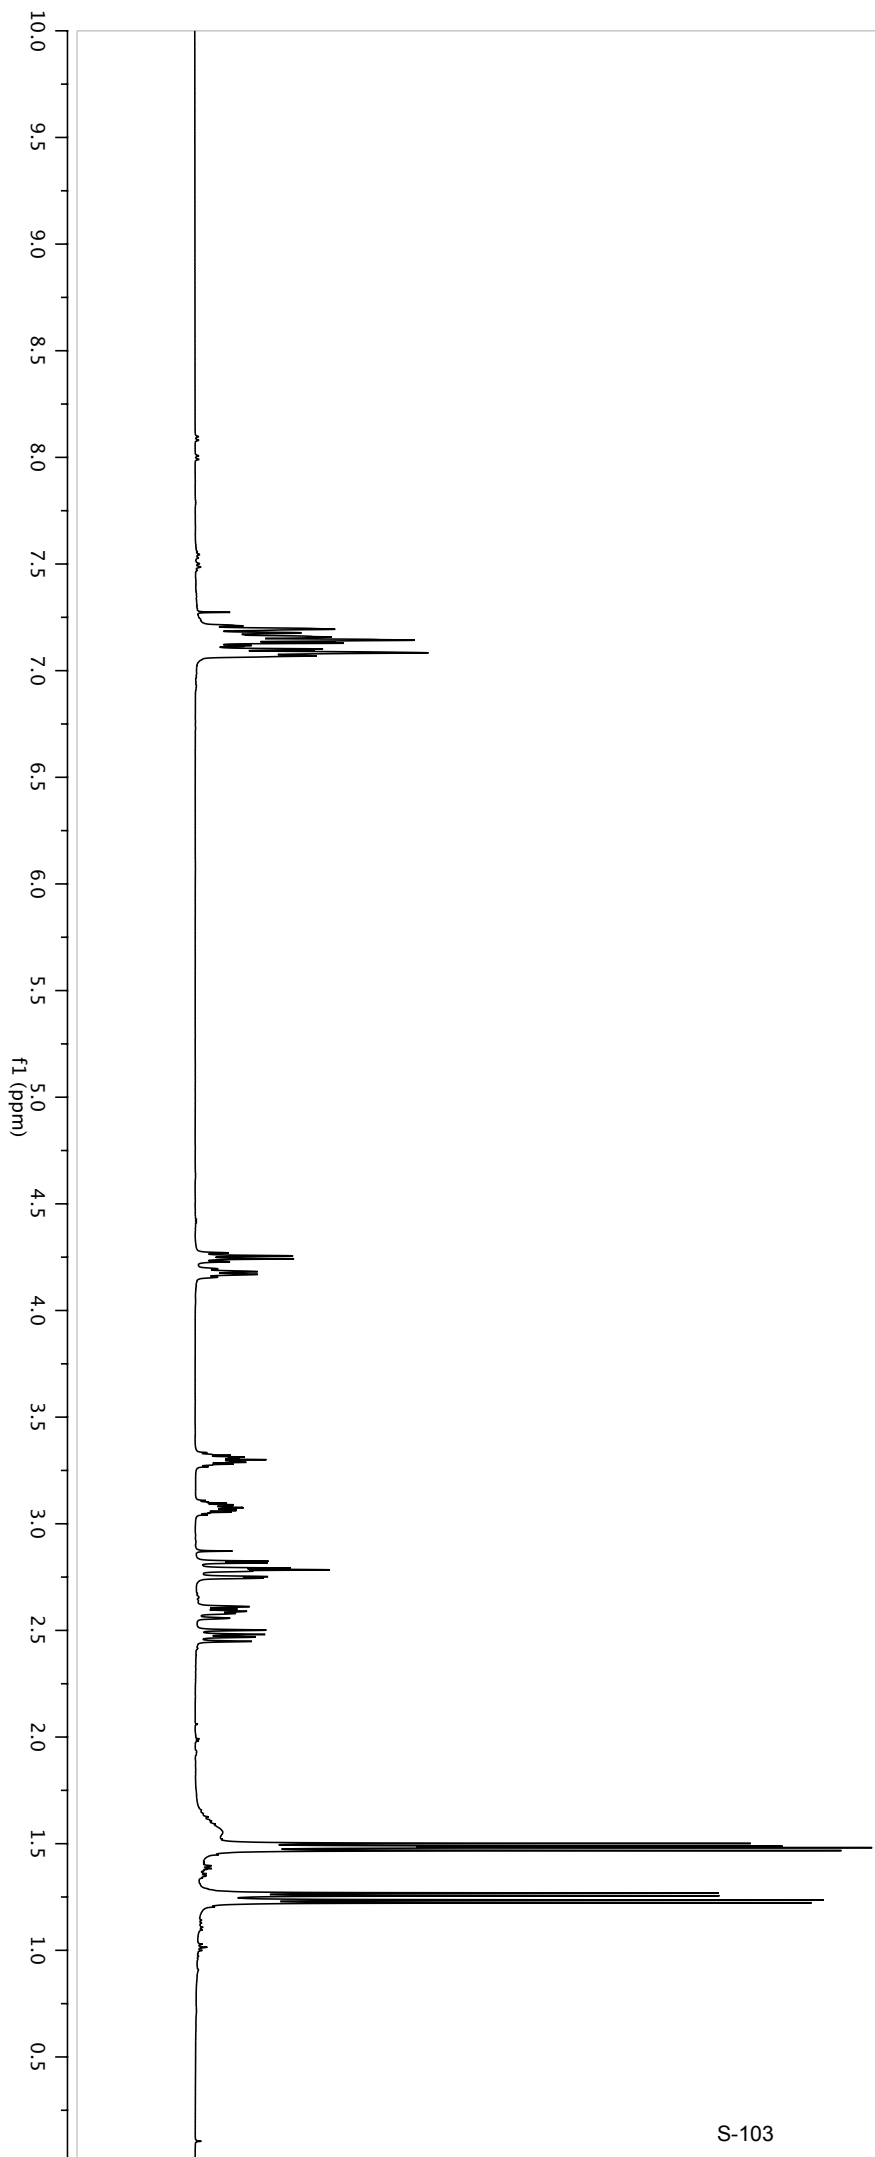

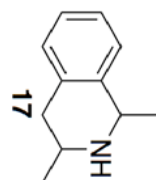

230  
220  
210  
200  
190  
180  
170  
160  
150  
140  
130  
120  
110  
100  
90  
80  
70  
60  
50  
40  
30  
20  
10  
0  
-10

f1 (ppm)

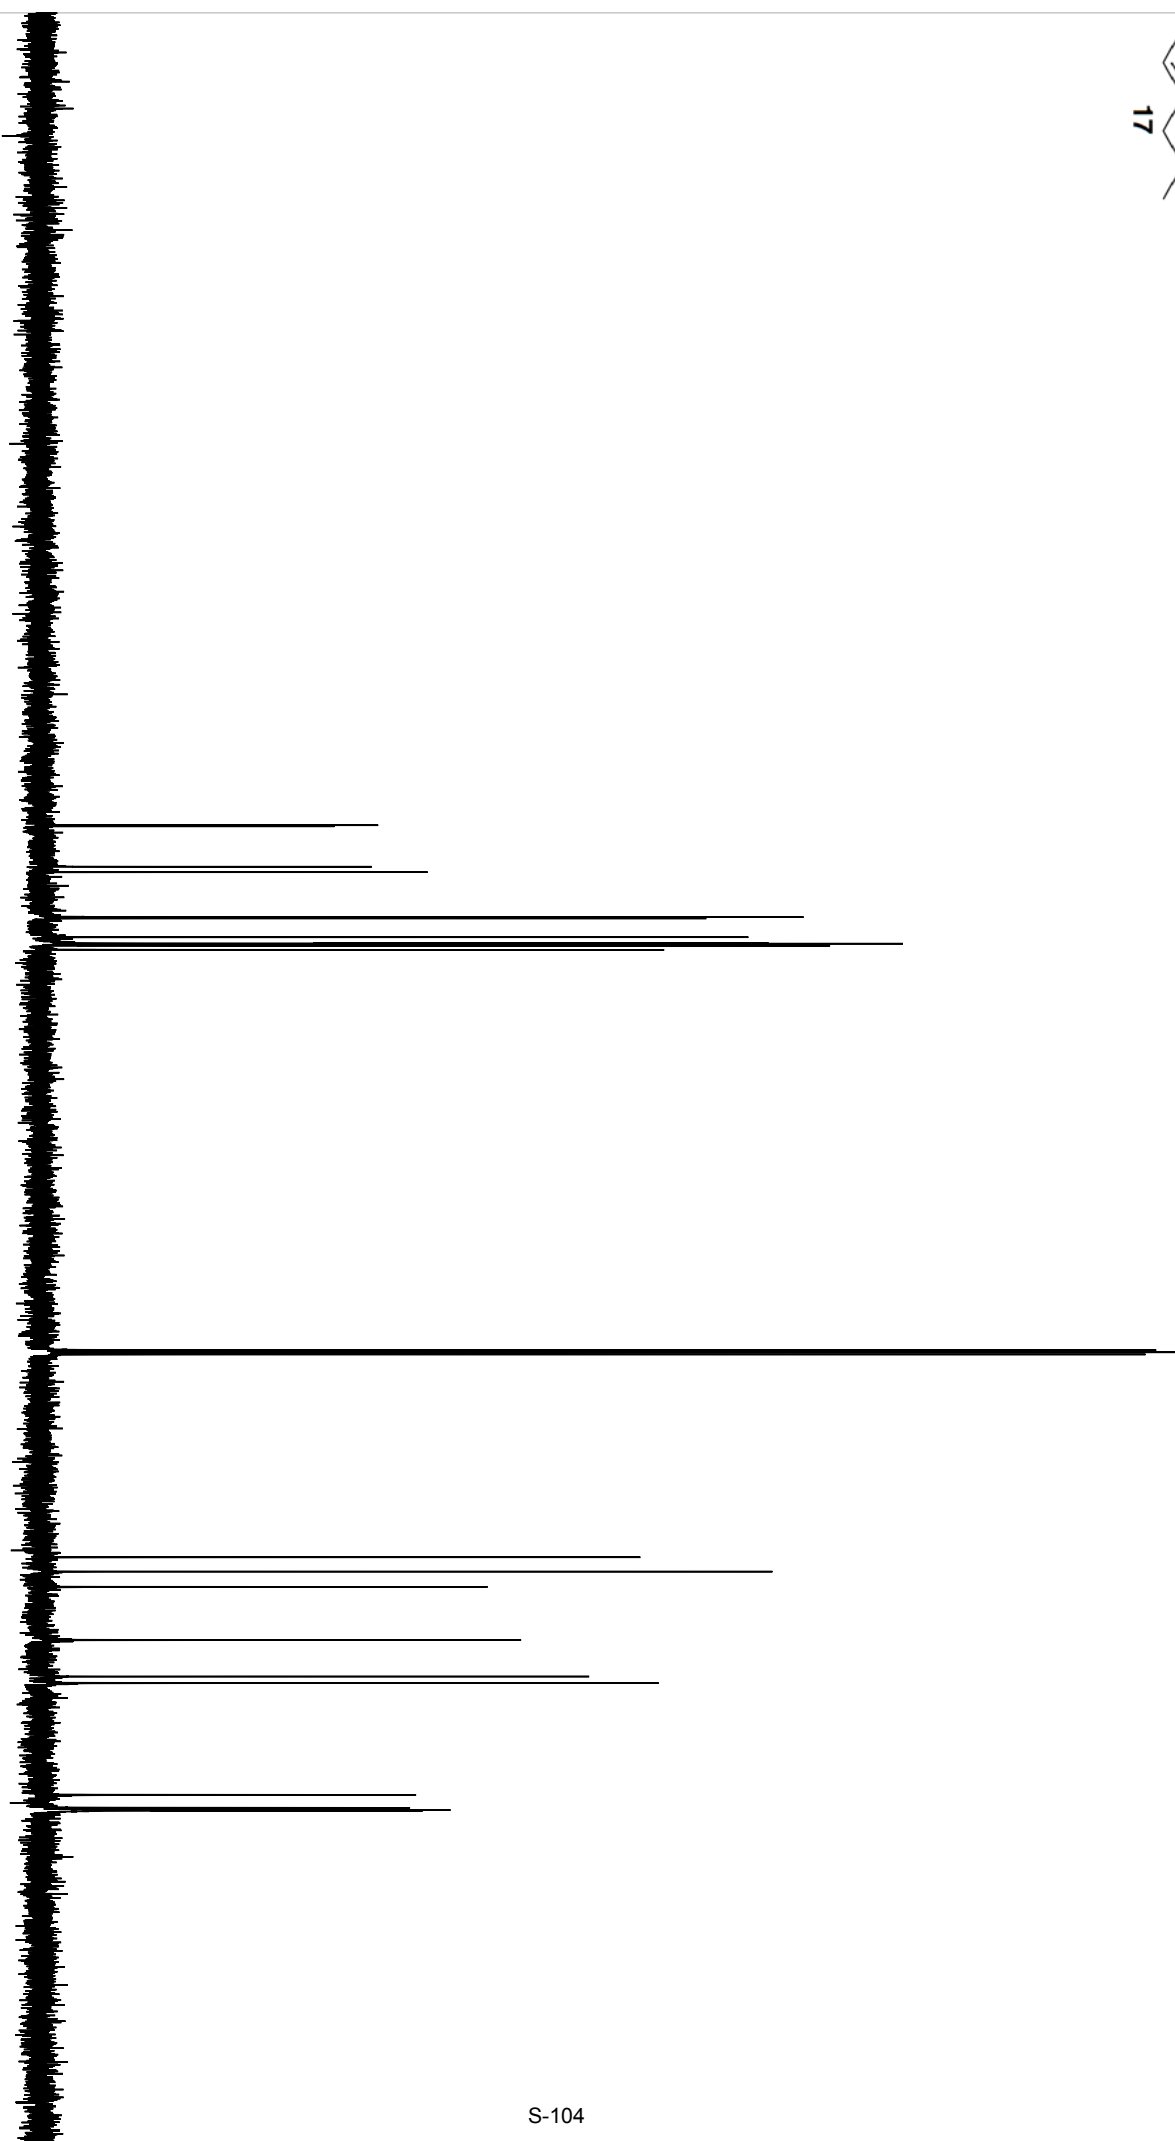



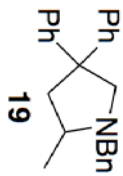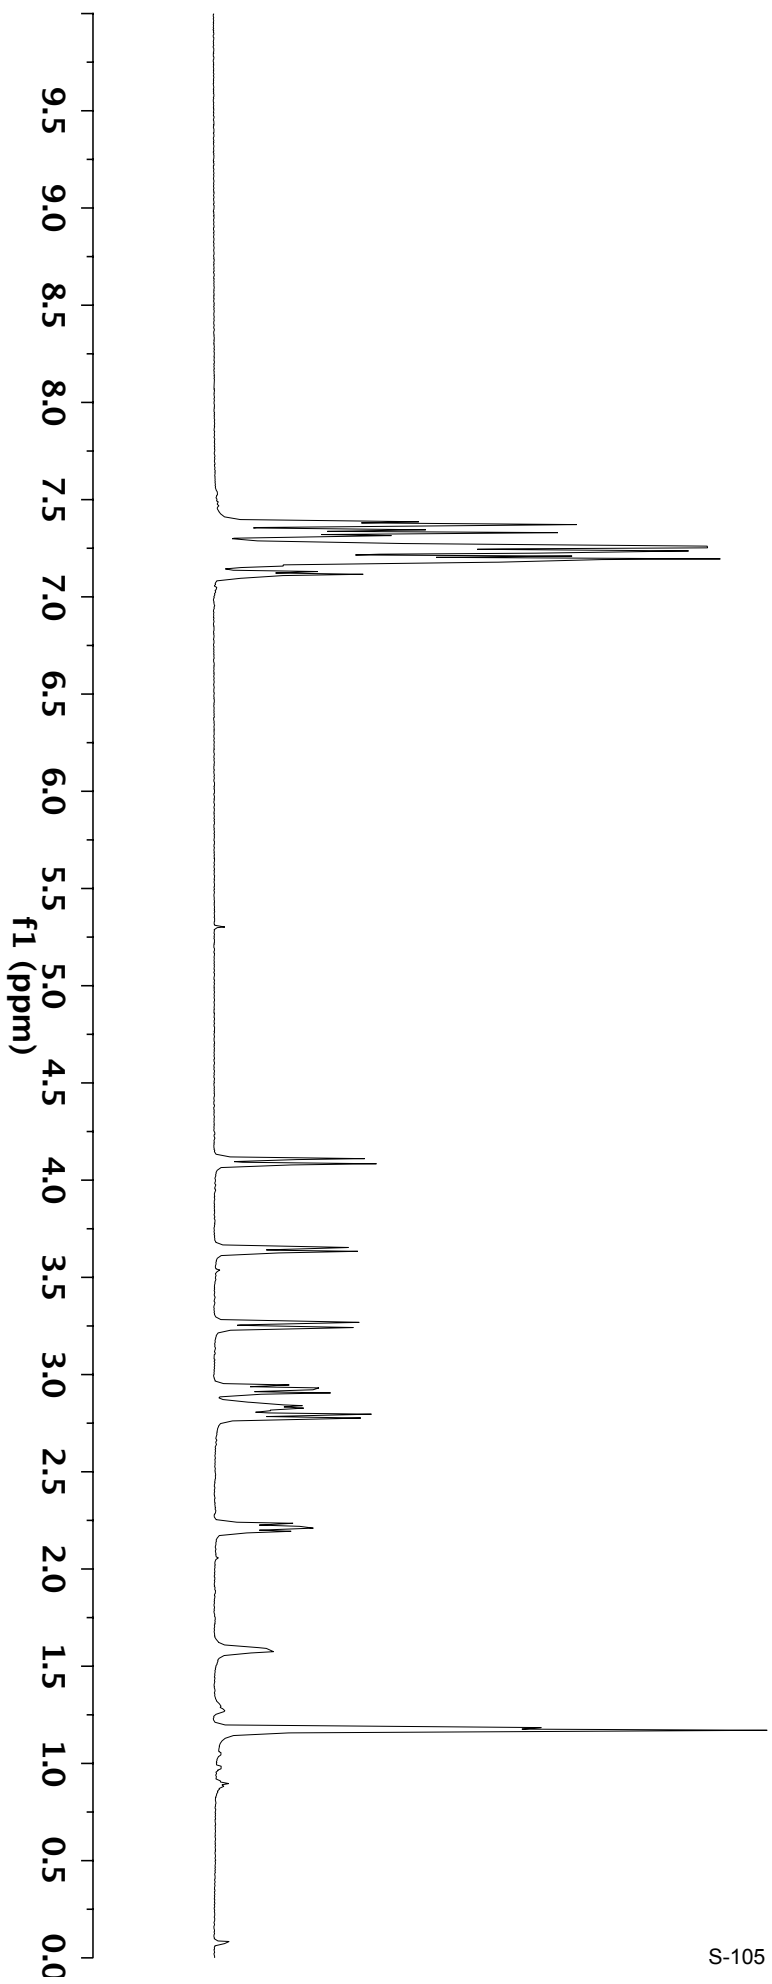

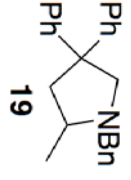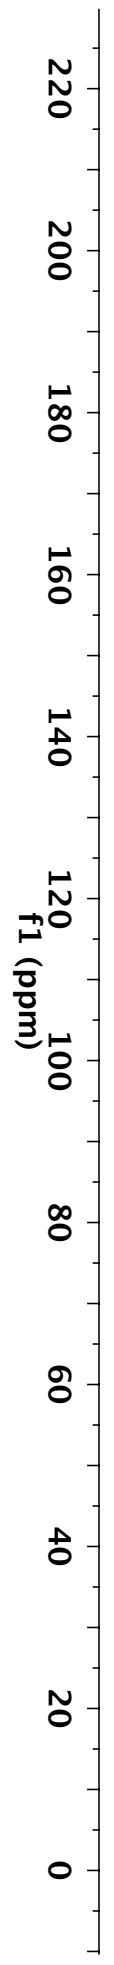

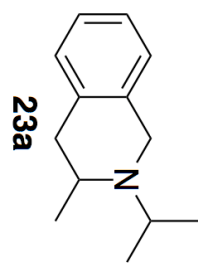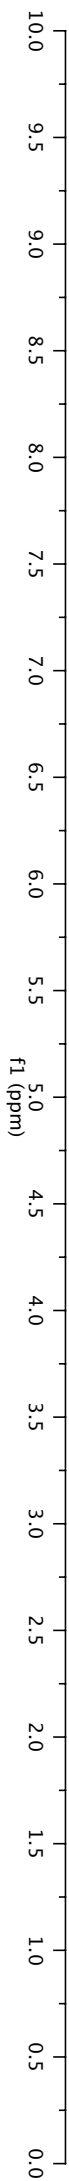

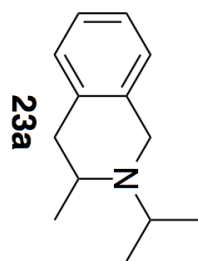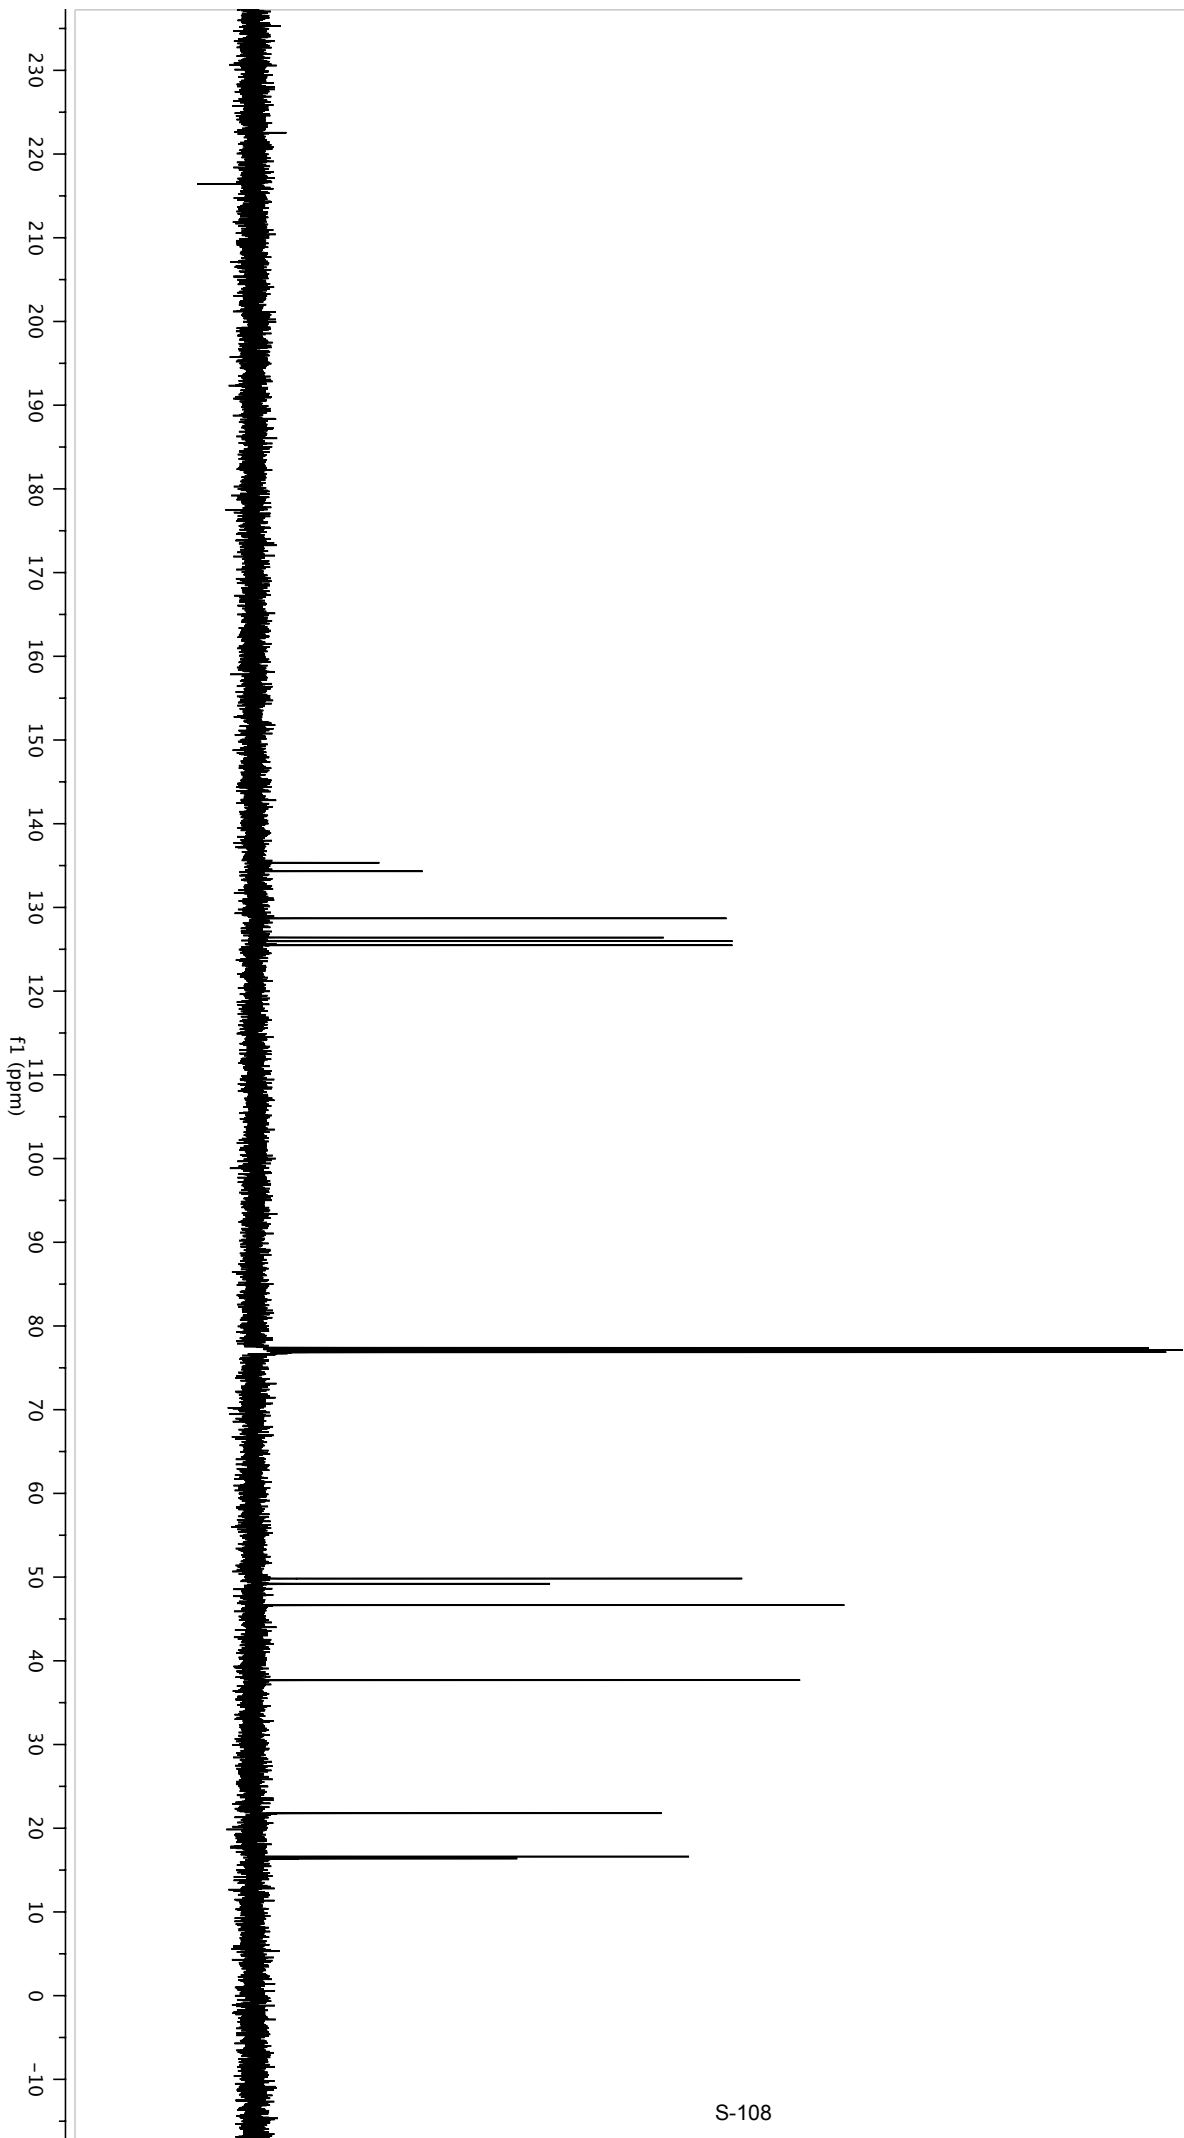

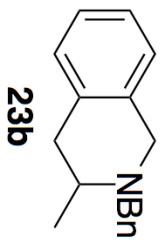

10.0  
9.5  
9.0  
8.5  
8.0  
7.5  
7.0  
6.5  
6.0  
5.5  
5.0  
4.5  
4.0  
3.5  
3.0  
2.5  
2.0  
1.5  
1.0  
0.5  
0.0

f1 (ppm)

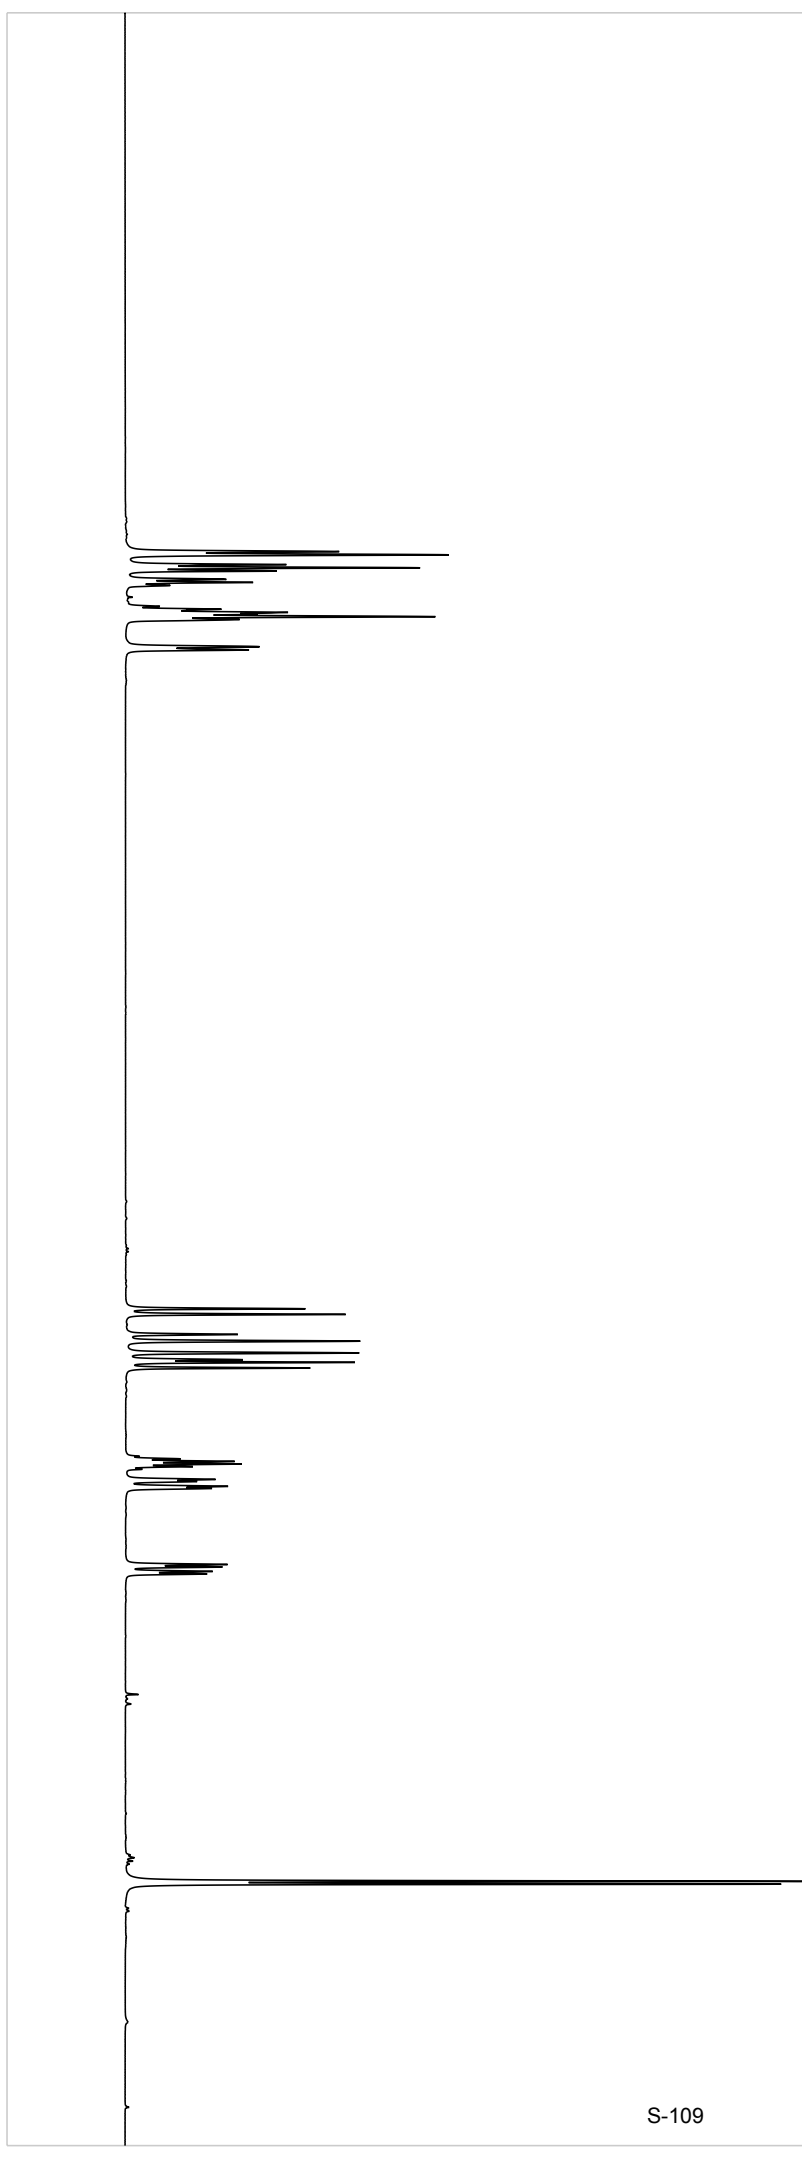

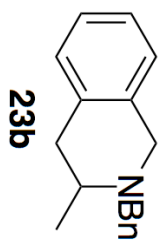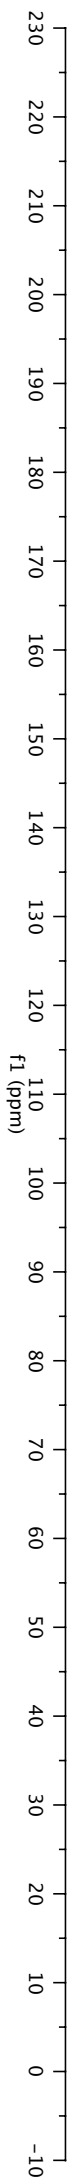

Supplement: NIHMS236694-supplement-1_si_001.pdf [file NIHMS236694-supplement-1_si_001.pdf]
